# Supplementary material
Source: MDPI journal article supplement (https://www.mdpi.com/2071-1050/15/15/12045)
Supplement: s1 [file s1]

Archive with 5 entries (5 files):
- Annex S1.xlsx
- Annex S2.pdf
- Annex S3.xlsx
- Annex S4.xlsx
- Annex S5.xlsx
