# Supplementary material
Source: MDPI journal article supplement (https://www.mdpi.com/2071-1050/15/15/12045)
Supplement: s1 [file s1 › Annex S1.xlsx]

## Sheet: primary UFU and detailed UFU
Annex S1. Number of field surveys of each type of primary UFU and detailed UFU in five cities.
Primary UFU	Zhanjiang	Haikou	Danzhou	Sanya	Yazhou	Detailed UFU	Zhanjiang	Haikou	Danzhou	Sanya	Yazhou
Industrial and commercial area	24	33	15	36	23	Industrial area	11	11	1	1	7
						Commercial area	13	22	14	35	16
Institutional business service area	46	63	49	22	49	Hospital	9	12	7	5	4
						Government organization	14	17	12	4	14
						Primary and secondary schools	17	18	28	7	22
						Research Institute	2	8	1	1	9
						University	4	8	1	5	0
Leisure and entertainment area	21	10	17	28	23	Square and sports center	7	3	11	5	12
						Park	14	7	6	23	11
Residential area	41	47	74	39	45	High-rise residential	18	42	69	22	26
						Low-rise residential	23	5	5	17	19
Traffic area	47	34	5	25	10	Transportation hub	3	5	3	3	1
						Road	44	29	2	22	9
Total	179	187	160	150	150		179	187	160	150	150
	0.26257	0.336898	0.4625	0.26	0.326667		0.24581	0.224599	0.43125	0.233333	0.173333
