# Supplementary material
Source: MDPI journal article supplement (https://www.mdpi.com/2071-1050/15/15/12045)
Supplement: s1 [file s1 › Annex S2.pdf]

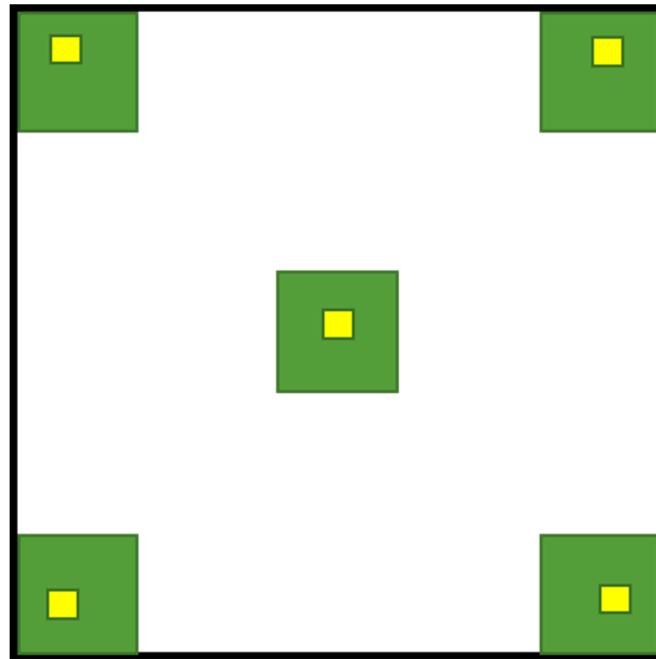

Annex S2. Diagram of quadrat survey

Note: The white square area (including the four corners and the middle part of the square) represents a  $20\text{m} \times 20\text{m}$  tree plot; the green square area represents a  $5\text{m} \times 5\text{m}$  shrub plots; and the yellow square area represents a  $1\text{m} \times 1\text{m}$  herb plots.
