# Supplementary material
Source: MDPI journal article supplement (https://www.mdpi.com/2071-1050/15/15/12045)
Supplement: s1 [file s1 › Annex S3.xlsx]

## Sheet: Zhanjiang
Plant species richness of various types in UFUs of Zhanjiang.
Code	PrimaryUFU	DetailedUFU	Total species richness	spontaneously growing species richness	Cultivated species richness	Native species richness	Non-native species richness
1	Institutional business service area	Primary and secondary schools	31	26	5	22	9
2	Traffic area	Road	15	10	5	9	6
3	Traffic area	Road	33	4	29	14	19
4	Institutional business service area	Research institute	59	37	22	30	29
5	Traffic area	Road	33	22	11	18	15
6	Institutional business service area	Hospital	43	21	22	23	20
7	Residential area	High-rise residential	59	19	40	26	33
8	Traffic area	Transportation hub	37	27	10	22	15
9	Traffic area	Road	17	4	13	6	11
10	Traffic area	Road	1	0	1	0	1
11	Industrial and commercial area	Industrial area	36	22	14	26	10
12	Institutional business service area	Primary and secondary schools	41	16	25	22	19
13	Traffic area	Road	1	0	1	0	1
14	Residential area	High-rise residential	49	11	38	19	30
15	Residential area	High-rise residential	46	2	44	18	28
16	Industrial and commercial area	Commercial area	31	17	14	16	15
17	Institutional business service area	Government organization	28	6	22	10	18
18	Traffic area	Road	4	1	3	1	3
19	Traffic area	Road	6	0	6	2	4
20	Institutional business service area	Primary and secondary schools	36	23	13	20	16
21	Residential area	High-rise residential	41	8	33	16	25
22	Leisure and entertainment area	Square and sports center	15	0	15	4	11
23	Industrial and commercial area	Commercial area	13	4	9	5	8
24	Institutional business service area	Primary and secondary schools	24	12	12	13	11
25	Traffic area	Road	14	10	4	8	6
26	Institutional business service area	University	44	25	19	26	18
27	Leisure and entertainment area	Park	63	24	39	30	33
28	Institutional business service area	Government organization	38	13	25	14	24
29	Leisure and entertainment area	Square and sports center	14	8	6	6	8
30	Leisure and entertainment area	Square and sports center	26	14	12	15	11
31	Traffic area	Road	7	0	7	2	5
32	Industrial and commercial area	Commercial area	20	19	1	18	2
33	Institutional business service area	Primary and secondary schools	20	14	6	15	5
34	Leisure and entertainment area	Square and sports center	20	7	13	8	12
35	Residential area	High-rise residential	46	23	23	22	24
36	Institutional business service area	Government organization	27	21	6	16	11
37	Traffic area	Road	23	4	19	6	17
38	Institutional business service area	Government organization	51	23	28	23	28
39	Institutional business service area	Government organization	40	8	32	21	19
40	Leisure and entertainment area	Square and sports center	53	23	30	22	31
41	Leisure and entertainment area	Park	47	30	17	25	22
42	Industrial and commercial area	Industrial area	48	24	24	25	23
43	Institutional business service area	Primary and secondary schools	45	17	28	22	23
44	Institutional business service area	Primary and secondary schools	37	8	29	15	22
45	Traffic area	Road	18	14	4	11	7
46	Residential area	High-rise residential	35	4	31	9	26
47	Institutional business service area	Government organization	44	24	20	22	22
48	Residential area	High-rise residential	54	14	40	22	32
49	Institutional business service area	Government organization	34	13	21	17	17
50	Institutional business service area	Hospital	36	14	22	20	16
51	Residential area	High-rise residential	42	3	39	15	27
52	Residential area	High-rise residential	50	2	48	19	31
53	Leisure and entertainment area	Park	5	0	5	2	3
54	Leisure and entertainment area	Park	14	8	6	7	7
55	Residential area	Low-rise residential	15	8	7	11	4
56	Residential area	High-rise residential	22	4	18	7	15
57	Leisure and entertainment area	Square and sports center	10	0	10	4	6
58	Residential area	Low-rise residential	34	14	20	21	13
59	Traffic area	Road	15	11	4	9	6
60	Industrial and commercial area	Industrial area	38	18	20	17	21
61	Residential area	Low-rise residential	36	27	9	26	10
62	Institutional business service area	Government organization	52	22	30	23	29
63	Leisure and entertainment area	Square and sports center	23	15	8	12	11
64	Traffic area	Road	7	3	4	3	4
65	Industrial and commercial area	Commercial area	18	3	15	6	12
66	Leisure and entertainment area	Park	41	9	32	18	23
67	Residential area	Low-rise residential	25	19	6	18	7
68	Traffic area	Road	21	10	11	9	12
69	Traffic area	Road	13	1	12	4	9
70	Industrial and commercial area	Industrial area	21	12	9	12	9
71	Traffic area	Road	27	12	15	11	16
72	Institutional business service area	Hospital	19	12	7	12	7
73	Traffic area	Road	9	1	8	3	6
74	Traffic area	Road	20	7	13	7	13
75	Industrial and commercial area	Industrial area	29	22	7	18	11
76	Residential area	Low-rise residential	12	9	3	8	4
77	Leisure and entertainment area	Park	30	11	19	14	16
78	Residential area	Low-rise residential	47	18	29	26	21
79	Residential area	Low-rise residential	26	16	10	18	8
80	Traffic area	Road	28	5	23	9	19
81	Industrial and commercial area	Commercial area	15	6	9	8	7
82	Industrial and commercial area	Commercial area	19	15	4	12	7
83	Industrial and commercial area	Commercial area	39	11	28	16	23
84	Industrial and commercial area	Commercial area	19	5	14	7	12
85	Industrial and commercial area	Industrial area	26	10	16	14	12
86	Traffic area	Road	32	15	17	15	17
87	Residential area	Low-rise residential	59	26	33	33	26
88	Traffic area	Road	7	3	4	4	3
89	Leisure and entertainment area	Park	27	13	14	13	14
90	Institutional business service area	Government organization	24	13	11	12	12
91	Institutional business service area	Government organization	11	0	11	3	8
92	Institutional business service area	Primary and secondary schools	34	11	23	16	18
93	Industrial and commercial area	Industrial area	32	17	15	20	12
94	Industrial and commercial area	Commercial area	35	19	16	19	16
95	Residential area	Low-rise residential	29	17	12	17	12
96	Residential area	Low-rise residential	50	33	17	32	18
97	Institutional business service area	Primary and secondary schools	32	20	12	23	9
98	Industrial and commercial area	Industrial area	27	19	8	16	11
99	Institutional business service area	Primary and secondary schools	39	9	30	22	17
100	Institutional business service area	Research institute	51	24	27	30	21
101	Leisure and entertainment area	Park	37	15	22	17	20
102	Residential area	High-rise residential	47	14	33	18	29
103	Institutional business service area	University	54	22	32	24	30
104	Institutional business service area	Hospital	39	21	18	19	20
105	Residential area	Low-rise residential	49	32	17	31	18
106	Residential area	Low-rise residential	23	16	7	14	9
107	Industrial and commercial area	Industrial area	19	2	17	12	7
108	Industrial and commercial area	Industrial area	29	15	14	16	13
109	Residential area	High-rise residential	76	25	51	31	45
110	Traffic area	Road	22	11	11	10	12
111	Residential area	High-rise residential	34	1	33	11	23
112	Leisure and entertainment area	Park	39	21	18	21	18
113	Residential area	High-rise residential	61	35	26	25	36
114	Industrial and commercial area	Commercial area	40	20	20	22	18
115	Leisure and entertainment area	Park	20	7	13	8	12
116	Industrial and commercial area	Commercial area	41	27	14	7	34
117	Traffic area	Transportation hub	20	9	11	8	12
118	Traffic area	Road	41	29	12	11	30
119	Traffic area	Road	27	16	11	15	12
120	Institutional business service area	Primary and secondary schools	64	29	35	30	34
121	Residential area	High-rise residential	71	39	32	27	44
122	Institutional business service area	Hospital	50	19	31	23	27
123	Institutional business service area	Primary and secondary schools	22	15	7	15	7
124	Leisure and entertainment area	Park	37	17	20	17	20
125	Traffic area	Road	1	0	1	0	1
126	Residential area	Low-rise residential	42	33	9	33	9
127	Traffic area	Road	23	23	0	12	11
128	Residential area	High-rise residential	49	41	8	20	29
129	Traffic area	Road	24	17	7	15	9
130	Institutional business service area	Primary and secondary schools	54	46	8	24	30
131	Institutional business service area	University	50	18	32	22	28
132	Institutional business service area	Government organization	8	6	2	5	3
133	Institutional business service area	Primary and secondary schools	30	26	4	14	16
134	Industrial and commercial area	Industrial area	37	33	4	17	20
135	Traffic area	Road	20	19	1	12	8
136	Traffic area	Road	7	4	3	1	6
137	Residential area	High-rise residential	58	52	6	23	35
138	Institutional business service area	Hospital	59	27	32	25	34
139	Institutional business service area	University	45	10	35	20	25
140	Institutional business service area	Hospital	41	13	28	14	27
141	Residential area	Low-rise residential	40	38	2	24	16
142	Institutional business service area	Primary and secondary schools	22	16	6	18	4
143	Residential area	Low-rise residential	51	46	5	26	25
144	Residential area	Low-rise residential	41	17	24	23	18
145	Traffic area	Road	21	18	3	12	9
146	Industrial and commercial area	Commercial area	6	0	6	3	3
147	Institutional business service area	Government organization	42	41	1	15	27
148	Institutional business service area	Hospital	8	0	8	3	5
149	Leisure and entertainment area	Park	21	13	8	13	8
150	Traffic area	Road	18	15	3	12	6
151	Residential area	Low-rise residential	36	32	4	29	7
152	Residential area	Low-rise residential	19	17	2	15	4
153	Residential area	Low-rise residential	35	32	3	19	16
154	Traffic area	Transportation hub	12	11	1	4	8
155	Institutional business service area	Primary and secondary schools	25	18	7	14	11
156	Institutional business service area	Primary and secondary schools	9	0	9	3	6
157	Traffic area	Road	6	0	6	1	5
158	Institutional business service area	Government organization	13	7	6	8	5
159	Residential area	Low-rise residential	31	30	1	18	13
160	Residential area	Low-rise residential	32	24	8	17	15
161	Traffic area	Road	17	6	11	7	10
162	Leisure and entertainment area	Park	14	3	11	6	8
163	Residential area	High-rise residential	40	14	26	11	29
164	Institutional business service area	Government organization	27	12	15	16	11
165	Traffic area	Road	25	21	4	8	17
166	Traffic area	Road	18	3	15	13	5
167	Traffic area	Road	33	28	5	20	13
168	Traffic area	Road	17	8	9	11	6
169	Traffic area	Road	17	13	4	8	9
170	Leisure and entertainment area	Park	32	21	11	19	13
171	Residential area	Low-rise residential	36	35	1	27	9
172	Traffic area	Road	14	13	1	7	7
173	Traffic area	Road	26	21	5	17	9
174	Institutional business service area	Hospital	45	36	9	24	21
175	Traffic area	Road	22	10	12	9	13
176	Residential area	Low-rise residential	25	22	3	20	5
177	Traffic area	Road	31	24	7	21	10
178	Industrial and commercial area	Commercial area	41	38	3	28	13
179	Traffic area	Road	30	26	4	19	11

## Sheet: Haikou
Plant species richness of various types in UFUs of Haikou.
Code	PrimaryUFU	DetailedUFU	Total species richness	spontaneously growing species richness	Cultivated species richness	Native species richness	Non-native species richness
1	Traffic area	Road	13	5	8	6	7
2	Institutional business service area	Research institutes	14	1	13	5	9
3	Industrial and commercial area	Industrial area	2	0	2	2	0
4	Traffic area	Road	8	5	3	3	5
5	Industrial and commercial area	Industrial area	15	7	8	4	11
6	Residential area	High-rise residential	14	1	13	4	10
7	Institutional business service area	Primary and secondary schools	10	1	9	4	6
8	Residential area	High-rise residential	21	1	20	5	16
9	Industrial and commercial area	Industrial area	3	1	2	3	0
10	Traffic area	Road	9	4	5	3	6
11	Industrial and commercial area	Industrial area	15	5	10	5	10
12	Leisure and entertainment area	Park	80	27	53	35	45
13	Residential area	High-rise residential	20	17	3	8	12
14	Institutional business service area	Government organization	3	0	3	2	1
15	Institutional business service area	Primary and secondary schools	13	7	6	4	9
16	Traffic area	Road	9	5	4	3	6
17	Industrial and commercial area	Industrial area	7	1	6	2	5
18	Residential area	High-rise residential	24	4	20	9	15
19	Residential area	High-rise residential	16	2	14	5	11
20	Residential area	High-rise residential	19	1	18	6	13
21	Industrial and commercial area	Industrial area	11	2	9	6	5
22	Industrial and commercial area	Commercial area	13	3	10	3	10
23	Industrial and commercial area	Industrial area	15	6	9	5	10
24	Residential area	Low-rise residential	5	2	3	2	3
25	Residential area	High-rise residential	14	2	12	4	10
26	Institutional business service area	Research institutes	9	2	7	4	5
27	Institutional business service area	Primary and secondary schools	11	3	8	4	7
28	Industrial and commercial area	Commercial area	12	1	11	3	9
29	Traffic area	Road	12	2	10	3	9
30	Traffic area	Road	11	2	9	4	7
31	Traffic area	Road	8	1	7	3	5
32	Traffic area	Transportation hub	12	1	11	3	9
33	Traffic area	Transportation hub	17	1	16	3	14
34	Institutional business service area	Hospital	11	2	9	5	6
35	Residential area	High-rise residential	6	1	5	2	4
36	Industrial and commercial area	Commercial area	14	2	12	4	10
37	Residential area	High-rise residential	9	2	7	2	7
38	Institutional business service area	Primary and secondary schools	16	2	14	5	11
39	Residential area	High-rise residential	14	2	12	2	12
40	Institutional business service area	Government organization	10	1	9	5	5
41	Leisure and entertainment area	Square and sports center	14	2	12	3	11
42	Institutional business service area	Research institutes	5	1	4	2	3
43	Residential area	High-rise residential	4	0	4	3	1
44	Traffic area	Road	13	1	12	4	9
45	Traffic area	Road	1	0	1	0	1
46	Institutional business service area	University	23	4	19	6	17
47	Residential area	High-rise residential	12	1	11	3	9
48	Institutional business service area	Government organization	11	1	10	4	7
49	Residential area	High-rise residential	19	3	16	7	12
50	Industrial and commercial area	Commercial area	9	1	8	3	6
51	Institutional business service area	Primary and secondary schools	5	1	4	4	1
52	Residential area	High-rise residential	12	2	10	3	9
53	Residential area	High-rise residential	18	1	17	7	11
54	Institutional business service area	Government organization	9	2	7	5	4
55	Institutional business service area	Hospital	13	2	11	6	7
56	Traffic area	Road	11	1	10	3	8
57	Industrial and commercial area	Commercial area	12	1	11	3	9
58	Institutional business service area	Research institutes	18	2	16	6	12
59	Institutional business service area	Government organization	5	1	4	2	3
60	Institutional business service area	Hospital	14	1	13	4	10
61	Institutional business service area	Primary and secondary schools	6	1	5	3	3
62	Institutional business service area	University	19	4	15	4	15
63	Residential area	High-rise residential	16	1	15	6	10
64	Industrial and commercial area	Industrial area	8	3	5	4	4
65	Leisure and entertainment area	Park	90	31	59	47	43
66	Industrial and commercial area	Commercial area	10	1	9	1	9
67	Institutional business service area	Government organization	8	3	5	6	2
68	Residential area	High-rise residential	13	4	9	5	8
69	Leisure and entertainment area	Park	126	35	91	61	65
70	Industrial and commercial area	Industrial area	12	1	11	5	7
71	Leisure and entertainment area	Square and sports center	15	7	8	8	7
72	Institutional business service area	Government organization	13	12	1	4	9
73	Traffic area	Road	1	0	1	0	1
74	Institutional business service area	Government organization	6	1	5	3	3
75	Residential area	High-rise residential	24	1	23	5	19
76	Residential area	High-rise residential	12	5	7	7	5
77	Leisure and entertainment area	Park	99	44	55	45	54
78	Institutional business service area	Government organization	6	1	5	3	3
79	Industrial and commercial area	Commercial area	6	1	5	2	4
80	Traffic area	Road	8	1	7	4	4
81	Industrial and commercial area	Commercial area	13	2	11	6	7
82	Industrial and commercial area	Commercial area	9	1	8	3	6
83	Institutional business service area	Government organization	10	0	10	3	7
84	Residential area	High-rise residential	10	2	8	4	6
85	Institutional business service area	Primary and secondary schools	3	0	3	1	2
86	Industrial and commercial area	Industrial area	23	4	19	8	15
87	Institutional business service area	University	24	10	14	8	16
88	Institutional business service area	Primary and secondary schools	8	0	8	1	7
89	Residential area	High-rise residential	24	2	22	8	16
90	Traffic area	Road	13	3	10	2	11
91	Institutional business service area	Government organization	14	4	10	7	7
92	Industrial and commercial area	Commercial area	19	11	8	10	9
93	Industrial and commercial area	Commercial area	14	1	13	4	10
94	Institutional business service area	Hospital	14	4	10	5	9
95	Industrial and commercial area	Industrial area	7	2	5	3	4
96	Residential area	High-rise residential	18	6	12	8	10
97	Industrial and commercial area	Commercial area	17	7	10	8	9
98	Industrial and commercial area	Commercial area	9	2	7	5	4
99	Institutional business service area	Primary and secondary schools	13	1	12	6	7
100	Traffic area	Road	4	0	4	1	3
101	Traffic area	Transportation hub	10	4	6	3	7
102	Institutional business service area	Primary and secondary schools	17	1	16	6	11
103	Institutional business service area	University	14	1	13	3	11
104	Leisure and entertainment area	Park	103	44	59	52	51
105	Residential area	High-rise residential	17	5	12	6	11
106	Institutional business service area	University	7	0	7	2	5
107	Residential area	High-rise residential	11	5	6	5	6
108	Industrial and commercial area	Commercial area	16	2	14	6	10
109	Institutional business service area	Hospital	16	7	9	5	11
110	Traffic area	Transportation hub	1	0	1	0	1
111	Industrial and commercial area	Commercial area	10	1	9	3	7
112	Traffic area	Road	14	4	10	5	9
113	Institutional business service area	Hospital	13	1	12	4	9
114	Traffic area	Road	10	1	9	2	8
115	Residential area	High-rise residential	13	2	11	4	9
116	Institutional business service area	University	16	4	12	7	9
117	Institutional business service area	Hospital	16	1	15	5	11
118	Traffic area	Road	15	1	14	4	11
119	Residential area	High-rise residential	17	5	12	4	13
120	Institutional business service area	Primary and secondary schools	9	1	8	4	5
121	Residential area	High-rise residential	7	2	5	1	6
122	Traffic area	Road	1	0	1	1	0
123	Leisure and entertainment area	Park	15	3	12	4	11
124	Institutional business service area	Research institutes	15	7	8	2	13
125	Leisure and entertainment area	Park	76	20	56	39	37
126	Institutional business service area	Government organization	6	1	5	1	5
127	Institutional business service area	Government organization	12	1	11	6	6
128	Institutional business service area	Research institutes	17	5	12	9	8
129	Institutional business service area	Primary and secondary schools	15	8	7	5	10
130	Industrial and commercial area	Commercial area	5	0	5	3	2
131	Institutional business service area	Primary and secondary schools	18	2	16	5	13
132	Traffic area	Road	6	0	6	4	2
133	Traffic area	Road	1	0	1	0	1
134	Residential area	High-rise residential	10	2	8	3	7
135	Residential area	High-rise residential	21	2	19	5	16
136	Residential area	High-rise residential	9	4	5	3	6
137	Institutional business service area	Government organization	15	3	12	6	9
138	Industrial and commercial area	Commercial area	13	6	7	5	8
139	Institutional business service area	Primary and secondary schools	4	0	4	1	3
140	Residential area	High-rise residential	12	2	10	4	8
141	Industrial and commercial area	Commercial area	15	2	13	5	10
142	Residential area	High-rise residential	16	4	12	6	10
143	Residential area	High-rise residential	2	0	2	1	1
144	Traffic area	Transportation hub	8	1	7	5	3
145	Institutional business service area	Research institutes	71	36	35	38	33
146	Institutional business service area	University	7	2	5	5	2
147	Institutional business service area	Primary and secondary schools	9	1	8	4	5
148	Industrial and commercial area	Commercial area	14	1	13	6	8
149	Residential area	High-rise residential	8	7	1	3	5
150	Industrial and commercial area	Commercial area	13	2	11	4	9
151	Traffic area	Road	17	5	12	4	13
152	Residential area	High-rise residential	12	4	8	3	9
153	Residential area	High-rise residential	17	2	15	5	12
154	Institutional business service area	Hospital	5	1	4	3	2
155	Institutional business service area	Primary and secondary schools	12	2	10	5	7
156	Leisure and entertainment area	Square and sports center	15	3	12	3	12
157	Institutional business service area	Research institutes	17	6	11	6	11
158	Institutional business service area	Primary and secondary schools	12	1	11	6	6
159	Traffic area	Road	8	2	6	4	4
160	Institutional business service area	University	10	1	9	5	5
161	Industrial and commercial area	Commercial area	7	2	5	2	5
162	Institutional business service area	Hospital	16	1	15	6	10
163	Residential area	High-rise residential	11	1	10	2	9
164	Traffic area	Road	5	1	4	3	2
165	Residential area	Low-rise residential	13	2	11	6	7
166	Residential area	High-rise residential	10	3	7	4	6
167	Residential area	High-rise residential	17	4	13	5	12
168	Institutional business service area	Government organization	9	1	8	4	5
169	Residential area	High-rise residential	13	4	9	6	7
170	Institutional business service area	Hospital	17	4	13	8	9
171	Industrial and commercial area	Commercial area	5	1	4	3	2
172	Traffic area	Road	15	10	5	9	6
173	Residential area	Low-rise residential	13	10	3	8	5
174	Traffic area	Road	5	0	5	3	2
175	Institutional business service area	Hospital	17	1	16	4	13
176	Traffic area	Road	7	1	6	4	3
177	Institutional business service area	Primary and secondary schools	6	1	5	3	3
178	Residential area	High-rise residential	7	2	5	2	5
179	Institutional business service area	Hospital	11	1	10	4	7
180	Residential area	High-rise residential	12	3	9	2	10
181	Residential area	Low-rise residential	8	6	2	6	2
182	Traffic area	Road	8	5	3	4	4
183	Residential area	Low-rise residential	15	0	15	7	8
184	Traffic area	Road	4	1	3	4	0
185	Traffic area	Road	7	2	5	4	3
186	Institutional business service area	Government organization	18	9	9	8	10
187	Institutional business service area	Government organization	19	6	13	8	11

## Sheet: Danzhou
Plant species richness of various types in UFUs of Danzhou.
Code	PrimaryUFU	DetailedUFU	Total species richness	spontaneously growing species richness	Cultivated species richness	Native species richness	Non-native species richness
1	Residential area	High-rise residential	18	7	11	10	8
2	Industrial and commercial area	Commercial area	17	6	11	5	12
3	Industrial and commercial area	Industrial area	26	8	18	9	17
4	Leisure and entertainment area	Park	17	5	12	7	10
5	Residential area	High-rise residential	27	7	20	8	19
6	Residential area	High-rise residential	21	10	11	11	10
7	Institutional business service area	Primary and secondary schools	19	10	9	7	12
8	Residential area	High-rise residential	21	9	12	7	14
9	Residential area	High-rise residential	17	8	9	5	12
10	Traffic area	Transportation hub	20	18	2	11	9
11	Industrial and commercial area	Commercial area	23	9	14	8	15
12	Residential area	High-rise residential	23	5	18	11	12
13	Institutional business service area	Government organization	28	19	9	16	12
14	Residential area	High-rise residential	29	8	21	16	13
15	Residential area	High-rise residential	30	16	14	12	18
16	Residential area	High-rise residential	27	9	18	14	13
17	Residential area	High-rise residential	18	10	8	5	13
18	Leisure and entertainment area	Park	36	15	21	14	22
19	Residential area	High-rise residential	23	3	20	7	16
20	Residential area	High-rise residential	35	6	29	3	32
21	Industrial and commercial area	Commercial area	45	9	36	9	36
22	Residential area	High-rise residential	27	14	13	16	11
23	Residential area	High-rise residential	20	9	11	6	14
24	Residential area	High-rise residential	28	15	13	16	12
25	Industrial and commercial area	Commercial area	23	13	10	11	12
26	Residential area	High-rise residential	18	2	16	2	16
27	Residential area	High-rise residential	28	28	0	21	7
28	Residential area	High-rise residential	21	5	16	7	14
29	Residential area	High-rise residential	33	5	28	2	31
30	Residential area	High-rise residential	21	4	17	7	14
31	Institutional business service area	Primary and secondary schools	48	48	0	40	8
32	Residential area	High-rise residential	37	0	37	11	26
33	Traffic area	Transportation hub	23	18	5	14	9
34	Residential area	High-rise residential	14	8	6	8	6
35	Residential area	Low-rise residential	16	11	5	13	3
36	Industrial and commercial area	Commercial area	10	8	2	3	7
37	Institutional business service area	Primary and secondary schools	39	15	24	15	24
38	Institutional business service area	Hospital	9	3	6	1	8
39	Institutional business service area	Government organization	12	10	2	7	5
40	Residential area	High-rise residential	35	22	13	25	10
41	Residential area	High-rise residential	26	23	3	2	24
42	Institutional business service area	Primary and secondary schools	28	12	16	14	14
43	Institutional business service area	Primary and secondary schools	20	5	15	5	15
44	Institutional business service area	Government organization	10	5	5	1	9
45	Industrial and commercial area	Commercial area	15	5	10	6	9
46	Institutional business service area	Primary and secondary schools	25	0	25	4	21
47	Leisure and entertainment area	Park	22	9	13	12	10
48	Traffic area	Transportation hub	13	4	9	2	11
49	Industrial and commercial area	Commercial area	16	12	4	0	16
50	Leisure and entertainment area	Square and sports center	14	4	10	6	8
51	Institutional business service area	Primary and secondary schools	24	6	18	5	19
52	Institutional business service area	Primary and secondary schools	12	3	9	3	9
53	Institutional business service area	Primary and secondary schools	12	4	8	6	6
54	Institutional business service area	Hospital	19	7	12	7	12
55	Residential area	Low-rise residential	15	12	3	10	5
56	Institutional business service area	Research institute	17	0	17	3	14
57	Residential area	Low-rise residential	66	10	56	14	52
58	Residential area	High-rise residential	8	2	6	4	4
59	Residential area	High-rise residential	10	10	0	3	7
60	Institutional business service area	Primary and secondary schools	8	3	5	3	5
61	Industrial and commercial area	Commercial area	16	5	11	4	12
62	Residential area	High-rise residential	25	15	10	6	19
63	Leisure and entertainment area	Square and sports center	13	3	10	4	9
64	Institutional business service area	Primary and secondary schools	26	11	15	15	11
65	Leisure and entertainment area	Square and sports center	36	21	15	20	16
66	Industrial and commercial area	Commercial area	8	7	1	5	3
67	Residential area	High-rise residential	25	8	17	9	16
68	Residential area	High-rise residential	20	6	14	7	13
69	Institutional business service area	Primary and secondary schools	11	7	4	8	3
70	Institutional business service area	Primary and secondary schools	27	19	8	14	13
71	Institutional business service area	Government organization	44	12	32	14	30
72	Institutional business service area	Hospital	8	6	2	4	4
73	Residential area	Low-rise residential	11	6	5	8	3
74	Residential area	Low-rise residential	16	4	12	11	5
75	Residential area	High-rise residential	27	13	14	5	22
76	Institutional business service area	Primary and secondary schools	21	6	15	2	19
77	Leisure and entertainment area	Park	21	4	17	6	15
78	Residential area	High-rise residential	13	2	11	1	12
79	Institutional business service area	Primary and secondary schools	21	6	15	8	13
80	Residential area	High-rise residential	20	4	16	2	18
81	Institutional business service area	Primary and secondary schools	28	20	8	5	23
82	Institutional business service area	Hospital	9	0	9	3	6
83	Residential area	High-rise residential	20	2	18	1	19
84	Institutional business service area	Primary and secondary schools	21	15	6	11	10
85	Leisure and entertainment area	Square and sports center	20	11	9	9	11
86	Leisure and entertainment area	Park	45	35	10	28	17
87	Institutional business service area	Primary and secondary schools	18	5	13	5	13
88	Residential area	High-rise residential	27	12	15	15	12
89	Industrial and commercial area	Commercial area	21	1	20	4	17
90	Residential area	High-rise residential	16	4	12	5	11
91	Residential area	High-rise residential	13	0	13	3	10
92	Residential area	High-rise residential	51	5	46	6	45
93	Residential area	High-rise residential	26	12	14	10	16
94	Institutional business service area	Government organization	26	5	21	4	22
95	Residential area	High-rise residential	21	6	15	6	15
96	Residential area	High-rise residential	28	13	15	10	18
97	Institutional business service area	Government organization	20	10	10	8	12
98	Institutional business service area	Government organization	45	10	35	11	34
99	Institutional business service area	Government organization	26	15	11	16	10
100	Institutional business service area	Government organization	54	10	44	10	44
101	Industrial and commercial area	Commercial area	19	6	13	4	15
102	Residential area	High-rise residential	16	11	5	5	11
103	Institutional business service area	Primary and secondary schools	23	9	14	6	17
104	Leisure and entertainment area	Square and sports center	40	22	18	9	31
105	Institutional business service area	Hospital	33	13	20	15	18
106	Institutional business service area	University	34	14	20	16	18
107	Institutional business service area	Primary and secondary schools	21	13	8	8	13
108	Residential area	High-rise residential	24	13	11	3	21
109	Industrial and commercial area	Commercial area	43	24	19	4	39
110	Institutional business service area	Primary and secondary schools	23	3	20	7	16
111	Leisure and entertainment area	Square and sports center	42	20	22	19	23
112	Residential area	High-rise residential	33	18	15	18	15
113	Residential area	High-rise residential	22	7	15	1	21
114	Leisure and entertainment area	Square and sports center	44	21	23	14	30
115	Residential area	High-rise residential	15	4	11	7	8
116	Leisure and entertainment area	Square and sports center	23	8	15	7	16
117	Leisure and entertainment area	Square and sports center	34	10	24	8	26
118	Institutional business service area	Government organization	39	12	27	9	30
119	Traffic area	Road	31	9	22	8	23
120	Industrial and commercial area	Commercial area	15	3	12	4	11
121	Residential area	High-rise residential	13	5	8	3	10
122	Traffic area	Road	19	7	12	8	11
123	Residential area	High-rise residential	25	13	12	10	15
124	Residential area	High-rise residential	23	16	7	12	11
125	Residential area	High-rise residential	26	18	8	10	16
126	Residential area	High-rise residential	19	10	9	13	6
127	Residential area	High-rise residential	20	12	8	7	13
128	Institutional business service area	Hospital	21	12	9	9	12
129	Residential area	High-rise residential	21	9	12	11	10
130	Leisure and entertainment area	Square and sports center	20	13	7	3	17
131	Residential area	High-rise residential	20	5	15	7	13
132	Leisure and entertainment area	Park	27	11	16	10	17
133	Residential area	High-rise residential	20	6	14	5	15
134	Residential area	High-rise residential	21	15	6	13	8
135	Residential area	High-rise residential	20	8	12	4	16
136	Residential area	High-rise residential	24	16	8	15	9
137	Residential area	High-rise residential	20	3	17	5	15
138	Residential area	High-rise residential	22	4	18	10	12
139	Residential area	High-rise residential	15	7	8	3	12
140	Institutional business service area	Primary and secondary schools	13	6	7	5	8
141	Residential area	High-rise residential	14	6	8	4	10
142	Institutional business service area	Hospital	12	3	9	2	10
143	Institutional business service area	Primary and secondary schools	11	5	6	3	8
144	Residential area	High-rise residential	21	10	11	12	9
145	Residential area	High-rise residential	22	11	11	15	7
146	Residential area	High-rise residential	23	11	12	10	13
147	Institutional business service area	Government organization	27	15	12	11	16
148	Residential area	High-rise residential	20	8	12	5	15
149	Residential area	High-rise residential	14	8	6	4	10
150	Institutional business service area	Primary and secondary schools	18	13	5	3	15
151	Industrial and commercial area	Commercial area	26	7	19	3	23
152	Institutional business service area	Primary and secondary schools	13	9	4	6	7
153	Residential area	High-rise residential	25	11	14	4	21
154	Residential area	High-rise residential	17	8	9	8	9
155	Residential area	High-rise residential	21	13	8	9	12
156	Institutional business service area	Primary and secondary schools	16	6	10	6	10
157	Institutional business service area	Primary and secondary schools	16	16	0	9	7
158	Leisure and entertainment area	Square and sports center	21	15	6	7	14
159	Institutional business service area	Government organization	24	11	13	10	14
160	Institutional business service area	Primary and secondary schools	8	6	2	3	5

## Sheet: Sanya
Plant species richness of various types in UFUs of Sanya.
Code	PrimaryUFU	DetailedUFU	Total species richness	spontaneously growing species richness	Cultivated species richness	Native species richness	Non-native species richness
1	Institutional business service area	Research Institute	31	13	18	14	17
2	Institutional business service area	Primary and middle schools	14	5	9	5	9
3	Institutional business service area	Government organization	50	31	19	23	27
4	Leisure and entertainment area	Park	57	22	35	26	31
5	Leisure and entertainment area	Square and sports center	29	8	21	10	19
6	Residential area	High-rise residential	41	6	35	15	26
7	Institutional business service area	Government organization	34	20	14	16	18
8	Traffic area	Transportation hub	35	5	30	12	23
9	Traffic area	Road	28	2	26	9	19
10	Residential area	Low-rise residential	32	9	23	18	14
11	Leisure and entertainment area	Park	52	15	37	22	30
12	Traffic area	Road	41	11	30	19	22
13	Institutional business service area	University	56	21	35	23	33
14	Residential area	High-rise residential	43	5	38	16	27
15	Institutional business service area	Hospital	36	6	30	14	22
16	Industrial and commercial area	Commercial area	60	18	42	23	37
17	Industrial and commercial area	Commercial area	46	5	41	20	26
18	Industrial and commercial area	Commercial area	29	7	22	11	18
19	Traffic area	Road	37	5	32	13	24
20	Traffic area	Road	27	13	14	13	14
21	Traffic area	Road	43	10	33	18	25
22	Leisure and entertainment area	Square and sports center	43	15	28	16	27
23	Residential area	Low-rise residential	37	20	17	22	15
24	Institutional business service area	Primary and middle schools	37	21	16	17	20
25	Residential area	Low-rise residential	36	7	29	16	20
26	Residential area	Low-rise residential	12	4	8	6	6
27	Traffic area	Road	5	3	2	1	4
28	Residential area	Low-rise residential	12	3	9	5	7
29	Traffic area	Road	20	12	8	11	9
30	Industrial and commercial area	Commercial area	28	5	23	9	19
31	Industrial and commercial area	Commercial area	35	5	30	12	23
32	Industrial and commercial area	Commercial area	20	2	18	5	15
33	Industrial and commercial area	Commercial area	25	0	25	8	17
34	Residential area	Low-rise residential	18	13	5	12	6
35	Industrial and commercial area	Commercial area	34	11	23	15	19
36	Traffic area	Road	19	7	12	8	11
37	Residential area	High-rise residential	53	15	38	23	30
38	Institutional business service area	Primary and middle schools	43	15	28	18	25
39	Residential area	Low-rise residential	43	18	25	24	19
40	Industrial and commercial area	Commercial area	48	14	34	19	29
41	Traffic area	Transportation hub	30	6	24	9	21
42	Traffic area	Road	31	19	12	15	16
43	Industrial and commercial area	Commercial area	24	8	16	9	15
44	Institutional business service area	Primary and middle schools	23	9	14	9	14
45	Institutional business service area	Government organization	39	8	31	12	27
46	Residential area	Low-rise residential	20	4	16	9	11
47	Residential area	Low-rise residential	29	11	18	16	13
48	Residential area	High-rise residential	45	9	36	18	27
49	Residential area	High-rise residential	44	14	30	19	25
50	Industrial and commercial area	Commercial area	32	14	18	13	19
51	Leisure and entertainment area	Square and sports center	45	8	37	15	30
52	Residential area	Low-rise residential	23	4	19	9	14
53	Institutional business service area	University	40	13	27	16	24
54	Leisure and entertainment area	Park	35	6	29	14	21
55	Residential area	Low-rise residential	23	4	19	10	13
56	Industrial and commercial area	Commercial area	42	4	38	13	29
57	Residential area	High-rise residential	42	11	31	15	27
58	Institutional business service area	University	25	4	21	8	17
59	Industrial and commercial area	Industrial area	23	6	17	8	15
60	Industrial and commercial area	Commercial area	8	2	6	3	5
61	Institutional business service area	University	49	10	39	20	29
62	Institutional business service area	Primary and middle schools	25	2	23	10	15
63	Industrial and commercial area	Commercial area	20	1	19	6	14
64	Institutional business service area	Hospital	26	2	24	9	17
65	Institutional business service area	Hospital	31	10	21	12	19
66	Residential area	High-rise residential	27	4	23	9	18
67	Residential area	High-rise residential	47	9	38	18	29
68	Residential area	High-rise residential	42	7	35	14	28
69	Residential area	High-rise residential	46	12	34	19	27
70	Residential area	High-rise residential	39	5	34	15	24
71	Residential area	High-rise residential	49	8	41	18	31
72	Leisure and entertainment area	Park	48	14	34	22	26
73	Industrial and commercial area	Commercial area	25	2	23	7	18
74	Traffic area	Transportation hub	27	7	20	10	17
75	Residential area	Low-rise residential	13	4	9	6	7
76	Industrial and commercial area	Commercial area	30	2	28	8	22
77	Leisure and entertainment area	Square and sports center	37	16	21	16	21
78	Industrial and commercial area	Commercial area	35	8	27	10	25
79	Industrial and commercial area	Commercial area	29	10	19	11	18
80	Residential area	High-rise residential	37	9	28	16	21
81	Industrial and commercial area	Commercial area	36	4	32	14	22
82	Industrial and commercial area	Commercial area	49	15	34	20	29
83	Institutional business service area	Primary and middle schools	25	2	23	7	18
84	Institutional business service area	Government organization	11	1	10	4	7
85	Residential area	Low-rise residential	21	6	15	11	10
86	Residential area	High-rise residential	23	8	15	8	15
87	Residential area	High-rise residential	27	4	23	9	18
88	Leisure and entertainment area	Park	33	9	24	15	18
89	Leisure and entertainment area	Park	23	8	15	11	12
90	Industrial and commercial area	Commercial area	19	5	14	6	13
91	Leisure and entertainment area	Park	17	3	14	6	11
92	Leisure and entertainment area	Park	19	6	13	7	12
93	Institutional business service area	Primary and middle schools	37	15	22	16	21
94	Institutional business service area	University	44	6	38	18	26
95	Industrial and commercial area	Commercial area	21	3	18	6	15
96	Industrial and commercial area	Commercial area	28	5	23	8	20
97	Industrial and commercial area	Commercial area	29	7	22	8	21
98	Traffic area	Road	22	6	16	9	13
99	Residential area	High-rise residential	46	15	31	18	28
100	Institutional business service area	Hospital	10	0	10	4	6
101	Institutional business service area	Hospital	18	8	10	7	11
102	Residential area	High-rise residential	47	9	38	15	32
103	Leisure and entertainment area	Park	39	8	31	16	23
104	Leisure and entertainment area	Park	47	9	38	20	27
105	Residential area	Low-rise residential	38	16	22	22	16
106	Residential area	Low-rise residential	4	1	3	2	2
107	Traffic area	Road	27	13	14	12	15
108	Industrial and commercial area	Commercial area	30	6	24	9	21
109	Leisure and entertainment area	Park	41	12	29	17	24
110	Leisure and entertainment area	Park	41	11	30	19	22
111	Residential area	High-rise residential	31	5	26	11	20
112	Residential area	High-rise residential	30	4	26	9	21
113	Industrial and commercial area	Commercial area	33	6	27	10	23
114	Industrial and commercial area	Commercial area	27	3	24	11	16
115	Industrial and commercial area	Commercial area	16	11	5	6	10
116	Residential area	Low-rise residential	8	2	6	5	3
117	Residential area	High-rise residential	31	10	21	13	18
118	Leisure and entertainment area	Park	49	21	28	26	23
119	Residential area	Low-rise residential	40	9	31	18	22
120	Leisure and entertainment area	Park	47	23	24	22	25
121	Leisure and entertainment area	Park	44	18	26	20	24
122	Leisure and entertainment area	Park	39	15	24	18	21
123	Leisure and entertainment area	Park	38	12	26	14	24
124	Leisure and entertainment area	Park	40	19	21	18	22
125	Leisure and entertainment area	Park	42	18	24	22	20
126	Leisure and entertainment area	Park	38	15	23	16	22
127	Leisure and entertainment area	Park	40	15	25	15	25
128	Leisure and entertainment area	Park	45	12	33	19	26
129	Traffic area	Road	16	7	9	7	9
130	Traffic area	Road	3	1	2	1	2
131	Traffic area	Road	18	6	12	5	13
132	Traffic area	Road	1	0	1	0	1
133	Traffic area	Road	11	0	11	4	7
134	Traffic area	Road	11	4	7	4	7
135	Traffic area	Road	32	7	25	11	21
136	Industrial and commercial area	Commercial area	34	8	26	11	23
137	Industrial and commercial area	Commercial area	25	11	14	10	15
138	Residential area	High-rise residential	44	9	35	14	30
139	Leisure and entertainment area	Park	36	8	28	14	22
140	Industrial and commercial area	Commercial area	30	10	20	9	21
141	Industrial and commercial area	Commercial area	16	3	13	5	11
142	Leisure and entertainment area	Square and sports center	33	4	29	9	24
143	Traffic area	Road	39	10	29	15	24
144	Industrial and commercial area	Commercial area	40	7	33	17	23
145	Traffic area	Road	17	3	14	5	12
146	Residential area	High-rise residential	27	5	22	10	17
147	Industrial and commercial area	Commercial area	30	12	18	11	19
148	Industrial and commercial area	Commercial area	4	1	3	2	2
149	Traffic area	Road	19	6	13	7	12
150	Traffic area	Road	28	10	18	14	14

## Sheet: Yazhou
Plant species richness of various types in UFUs of Yazhou.
Code	PrimaryUFU	DetailedUFU	Total species richness	spontaneously growing species richness	Cultivated species richness	Native species richness	Non-native species richness
1	Residential area	High-rise residential	25	6	19	14	11
2	Institutional business service area	Primary and secondary schools	9	3	6	2	7
3	Residential area	High-rise residential	25	13	12	20	5
4	Residential area	High-rise residential	24	12	12	19	5
5	Institutional business service area	Government organization	14	7	7	9	5
6	Institutional business service area	Research institute	19	6	13	10	9
7	Industrial and commercial area	Commercial area	20	5	15	2	18
8	Residential area	High-rise residential	23	11	12	7	16
9	Institutional business service area	Government organization	22	7	15	6	16
10	Industrial and commercial area	Commercial area	29	11	18	18	11
11	Institutional business service area	Research institute	13	2	11	6	7
12	Institutional business service area	Hospital	22	12	10	7	15
13	Industrial and commercial area	Commercial area	18	6	12	2	16
14	Residential area	High-rise residential	15	4	11	5	10
15	Industrial and commercial area	Commercial area	27	10	17	12	15
16	Residential area	Low-rise residential	13	3	10	5	8
17	Industrial and commercial area	Commercial area	28	10	18	12	16
18	Residential area	High-rise residential	14	2	12	2	12
19	Residential area	High-rise residential	15	4	11	6	9
20	Residential area	High-rise residential	20	7	13	6	14
21	Residential area	High-rise residential	19	6	13	7	12
22	Institutional business service area	Primary and secondary schools	7	3	4	2	5
23	Residential area	High-rise residential	18	6	12	6	12
24	Residential area	High-rise residential	16	4	12	3	13
25	Residential area	High-rise residential	30	14	16	14	16
26	Residential area	High-rise residential	24	8	16	9	15
27	Industrial and commercial area	Commercial area	8	3	5	4	4
28	Residential area	High-rise residential	10	3	7	6	4
29	Residential area	High-rise residential	16	3	13	3	13
30	Institutional business service area	Government organization	26	9	17	5	21
31	Institutional business service area	Primary and secondary schools	12	5	7	3	9
32	Institutional business service area	Primary and secondary schools	11	5	6	4	7
33	Residential area	High-rise residential	16	3	13	5	11
34	Residential area	Low-rise residential	17	5	12	9	8
35	Residential area	High-rise residential	14	5	9	5	9
36	Residential area	Low-rise residential	18	7	11	10	8
37	Residential area	Low-rise residential	17	4	13	7	10
38	Institutional business service area	Primary and secondary schools	8	4	4	3	5
39	Residential area	High-rise residential	12	6	6	5	7
40	Institutional business service area	Hospital	9	5	4	2	7
41	Residential area	Low-rise residential	15	6	9	9	6
42	Institutional business service area	Primary and secondary schools	6	2	4	2	4
43	Industrial and commercial area	Commercial area	7	3	4	2	5
44	Leisure and entertainment area	Square and sports center	9	4	5	3	6
45	Traffic area	Transportation hub	27	18	9	14	13
46	Institutional business service area	Primary and secondary schools	9	3	6	3	6
47	Institutional business service area	Primary and secondary schools	11	4	7	4	7
48	Institutional business service area	Primary and secondary schools	15	6	9	6	9
49	Residential area	Low-rise residential	13	11	2	9	4
50	Institutional business service area	Primary and secondary schools	14	7	7	7	7
51	Institutional business service area	Hospital	15	10	5	7	8
52	Residential area	Low-rise residential	17	8	9	9	8
53	Residential area	Low-rise residential	19	5	14	10	9
54	Institutional business service area	Primary and secondary schools	12	4	8	5	7
55	Institutional business service area	Primary and secondary schools	9	4	5	3	6
56	Institutional business service area	Primary and secondary schools	12	3	9	5	7
57	Institutional business service area	Primary and secondary schools	16	3	13	6	10
58	Industrial and commercial area	Industrial area	18	7	11	7	11
59	Residential area	High-rise residential	19	8	11	9	10
60	Leisure and entertainment area	Square and sports center	29	13	16	12	17
61	Industrial and commercial area	Commercial area	11	7	4	7	4
62	Traffic area	Road	13	6	7	4	9
63	Institutional business service area	Government organization	14	4	10	5	9
64	Institutional business service area	Primary and secondary schools	10	4	6	5	5
65	Institutional business service area	Primary and secondary schools	8	2	6	2	6
66	Industrial and commercial area	Industrial area	13	6	7	10	3
67	Industrial and commercial area	Commercial area	17	6	11	7	10
68	Industrial and commercial area	Industrial area	21	8	13	8	13
69	Residential area	Low-rise residential	12	7	5	5	7
70	Residential area	High-rise residential	10	7	3	4	6
71	Institutional business service area	Primary and secondary schools	7	4	3	3	4
72	Industrial and commercial area	Commercial area	11	6	5	4	7
73	Institutional business service area	Primary and secondary schools	9	4	5	3	6
74	Institutional business service area	Primary and secondary schools	12	5	7	9	3
75	Residential area	High-rise residential	34	8	26	11	23
76	Leisure and entertainment area	Square and sports center	11	5	6	5	6
77	Leisure and entertainment area	Square and sports center	21	9	12	9	12
78	Traffic area	Road	13	5	8	2	11
79	Residential area	High-rise residential	23	6	17	7	16
80	Institutional business service area	Research institute	29	4	25	16	13
81	Institutional business service area	Government organization	22	7	15	7	15
82	Leisure and entertainment area	Park	23	8	15	7	16
83	Institutional business service area	Government organization	10	4	6	4	6
84	Institutional business service area	Government organization	6	2	4	2	4
85	Leisure and entertainment area	Park	18	8	10	10	8
86	Residential area	High-rise residential	15	6	9	3	12
87	Residential area	Low-rise residential	8	2	6	5	3
88	Residential area	Low-rise residential	34	12	22	15	19
89	Leisure and entertainment area	Square and sports center	11	7	4	6	5
90	Institutional business service area	Primary and secondary schools	8	5	3	4	4
91	Leisure and entertainment area	Square and sports center	10	4	6	3	7
92	Institutional business service area	Government organization	14	2	12	4	10
93	Institutional business service area	Primary and secondary schools	6	3	3	3	3
94	Residential area	Low-rise residential	16	7	9	9	7
95	Institutional business service area	Government organization	7	3	4	4	3
96	Residential area	Low-rise residential	15	5	10	6	9
97	Leisure and entertainment area	Park	21	8	13	4	17
98	Leisure and entertainment area	Park	9	4	5	5	4
99	Leisure and entertainment area	Square and sports center	18	5	13	9	9
100	Industrial and commercial area	Commercial area	14	7	7	4	10
101	Industrial and commercial area	Industrial area	5	2	3	1	4
102	Leisure and entertainment area	Park	21	5	16	6	15
103	Leisure and entertainment area	Square and sports center	12	6	6	4	8
104	Institutional business service area	Research institute	12	9	3	7	5
105	Institutional business service area	Research institute	13	3	10	4	9
106	Traffic area	Road	15	10	5	7	8
107	Residential area	Low-rise residential	15	9	6	8	7
108	Residential area	Low-rise residential	13	8	5	5	8
109	Industrial and commercial area	Commercial area	10	7	3	5	5
110	Leisure and entertainment area	Park	13	9	4	5	8
111	Institutional business service area	Government organization	10	3	7	3	7
112	Residential area	Low-rise residential	19	6	13	8	11
113	Institutional business service area	Research institute	10	5	5	4	6
114	Leisure and entertainment area	Park	12	6	6	4	8
115	Leisure and entertainment area	Park	13	6	7	3	10
116	Traffic area	Road	13	5	8	5	8
117	Industrial and commercial area	Commercial area	10	4	6	4	6
118	Leisure and entertainment area	Park	12	6	6	6	6
119	Traffic area	Road	23	5	18	9	14
120	Institutional business service area	Government organization	19	8	11	8	11
121	Industrial and commercial area	Commercial area	17	7	10	7	10
122	Residential area	Low-rise residential	17	11	6	10	7
123	Industrial and commercial area	Commercial area	25	12	13	9	16
124	Traffic area	Road	12	7	5	5	7
125	Leisure and entertainment area	Park	15	5	10	6	9
126	Institutional business service area	Research institute	8	3	5	2	6
127	Industrial and commercial area	Industrial area	12	7	5	6	6
128	Traffic area	Road	16	4	12	5	11
129	Traffic area	Road	11	8	3	5	6
130	Residential area	High-rise residential	9	4	5	3	6
131	Institutional business service area	Research institute	12	3	9	5	7
132	Institutional business service area	Research institute	9	6	3	4	5
133	Leisure and entertainment area	Square and sports center	9	2	7	3	6
134	Residential area	Low-rise residential	7	3	4	3	4
135	Traffic area	Road	11	5	6	4	7
136	Residential area	Low-rise residential	13	8	5	6	7
137	Industrial and commercial area	Industrial area	10	6	4	4	6
138	Institutional business service area	Hospital	18	12	6	8	10
139	Institutional business service area	Government organization	8	4	4	3	5
140	Residential area	High-rise residential	15	6	9	5	10
141	Residential area	High-rise residential	13	7	6	5	8
142	Leisure and entertainment area	Park	8	5	3	3	5
143	Institutional business service area	Primary and secondary schools	10	4	6	2	8
144	Industrial and commercial area	Commercial area	14	10	4	6	8
145	Leisure and entertainment area	Square and sports center	7	2	5	2	5
146	Industrial and commercial area	Industrial area	15	11	4	8	7
147	Institutional business service area	Government organization	30	18	12	16	14
148	Leisure and entertainment area	Square and sports center	12	9	3	5	7
149	Leisure and entertainment area	Square and sports center	15	2	13	5	10
150	Institutional business service area	Government organization	10	6	4	4	6
