# Supplementary material
Source: MDPI journal article supplement (https://www.mdpi.com/2071-1050/15/15/12045)
Supplement: s1 [file s1 › Annex S4.xlsx]

## Sheet: species richness
Annex S4. Specific values of species richness for each plant type in five cities.
City	Zhanjiang					Haikou					Danzhou					Sanya					Yazhou
Primary UFU Type	Total species richness	Cultivated species richness	Spontaneously growing species richness	Native species richness	Non-native species richness	Total species richness	Cultivated species richness	Spontaneously growing species richness	Native species richness	Non-native species richness	Total species richness	Cultivated species richness	Spontaneously growing species richness	Native species richness	Non-native species richness	Total species richness	Cultivated species richness	Spontaneously growing species richness	Native species richness	Non-native species richness	Total species richness	Cultivated species richness	Spontaneously growing species richness	Native species richness	Non-native species richness
Industrial and commercial area	27.74±10.41	12.96±6.44	14.78±8.41	14.43±6.13	13.3±7.17	11.3±4.57	8.79±3.6	2.52±2.4	4.21±1.93	7.09±3.33	22±10.35	13.57±8.6	8.43±5.27	5.21±2.86	16.79±9.62	29.46±11.98	22.65±9.24	6.81±4.68	10.27±5	19.19±7.31	15.1±6.53	8.15±4.85	6.95±2.73	6±3.83	9.1±4.38
Institutional business service area	34.45±13.95	18.88±10.26	15.57±7.48	17.5±6.69	16.95±8.56	12±4.94	9.61±3.89	2.39±2.45	4.5±1.83	7.5±3.84	20.93±9.81	11.98±8.06	8.95±5.33	7.66±4.55	13.27±7.26	30.86±13.91	20.95±9.68	9.9±8.14	12.38±6.28	18.48±7.96	11.45±4.92	6.58±3.01	4.87±3.01	4.63±2.83	6.82±2.65
Leisure and entertainment area	28±14.64	15.67±8.78	12.33±8.17	13.38±7.37	14.62±7.74	14.75±0.43	11±1.73	3.75±1.92	4.5±2.06	10.25±1.92	26.88±9.91	14.88±5.52	12±6.29	9.69±4.78	17.19±7.07	39.24±9.21	26.36±6.53	12.88±5.57	17±5.09	22.24±4.82	14.41±5.61	8.55±4.13	5.86±2.56	5.45±2.54	8.95±3.94
Residential area	36±11.61	19.33±13.68	16.67±9.36	18.57±6.4	17.43±9.15	13.7±5.07	10.61±5.44	3.09±2.87	4.65±2.03	9.04±3.92	21.55±5.92	12.56±6.11	8.98±5.19	8.52±4.91	13.03±5.52	32.16±12.67	23.95±10.42	8.22±4.6	13.54±5.48	18.62±8.41	17.16±5.41	10.41±4.37	6.75±2.76	7.34±3.13	9.81±3.43
Traffic area	18.72±9.9	7.89±6.1	10.83±8.58	9.06±5.83	9.66±5.59	8.59±4.6	6.53±3.87	2.06±2.21	3.18±1.79	5.41±3.71	18.75±3.63	7±3.81	11.75±6.34	8.75±4.44	10±1	22.67±10.91	15.88±9.1	6.79±4.5	8.92±4.81	13.75±6.65	15.4±5.1	8.1±4.06	7.3±3.95	6±3.19	9.4±2.58
Detailed UFU Type
Commercial area	24.67±11.41	12.5±7.03	12.17±8.14	11.58±6.1	13.08±8.66	11.59±3.73	9.27±2.88	2.32±2.48	4.18±2.04	7.41±2.53	21.69±10.68	13.23±8.83	8.46±5.47	4.92±2.76	16.77±9.99	29.72±12.15	22.88±9.36	6.84±4.77	10.36±5.08	19.36±7.4	15.79±6.9	8.79±5.09	7±2.75	6.14±4.27	9.64±4.71
Industrial area	31.09±7.94	13.45±5.69	17.64±7.74	17.55±4.4	13.55±5.05	10.73±5.86	7.82±4.57	2.91±2.19	4.27±1.71	6.45±4.46	26±0	18±0	8±0	9±0	17±0	23±0	17±0	6±0	8±0	15±0	13.5±5.25	6.67±3.86	6.83±2.67	5.67±2.49	7.83±3.13
Hospital	36.88±15.31	21±8.99	15.88±7.62	17.38±6.87	19.5±9.37	13.82±3.33	11.64±3.26	2.18±1.9	4.91±1.31	8.91±2.75	16±9.76	9.2±5.98	6.8±5.04	6.4±5.04	9.6±4.96	21.25±7.98	16.25±6.34	5±4.12	8±2.92	13.25±5.12	14±3.74	5±0.82	9±2.94	5.67±2.62	8.33±1.25
Government organization	30.54±13.84	17.62±9.47	12.92±7.31	14.62±6.48	15.92±8.07	9.8±4.49	7.73±3.02	2.07±2.35	4.4±2.06	5.4±2.85	27.36±11	16.09±10.51	11.27±3.96	9.73±4.47	17.64±9.36	33.5±14.22	18.5±7.89	15±11.47	13.75±6.87	19.75±8.23	13.56±7.75	7.44±3.95	6.11±4.61	5.67±4.08	7.89±4.12
Primary and secondary schools	31.94±12.14	15.69±10.35	16.25±7.3	17.75±5.86	14.19±7.76	10.39±4.39	8.56±3.86	1.83±2.14	3.94±1.58	6.44±3.29	18.81±7.71	10.27±6.42	8.54±5.4	6.88±3.94	11.92±5.82	26.29±13.12	17.57±8.5	8.71±7.5	10.57±6.11	15.71±7.28	10.05±2.7	6.09±2.29	3.95±1.19	3.91±1.81	6.14±1.87
Research Institute	51±0	27±0	24±0	30±0	21±0	14.4±2.94	10.2±2.32	4.2±2.32	5.2±2.32	9.2±2.71	17±0	17±0	0±0	3±0	14±0	31±0	18±0	13±0	14±0	17±0	12.5±4.15	8.5±3.57	4±1.58	5.5±2.96	7±1.22
University	48.25±4.02	29.5±6.18	18.75±5.63	23±2.24	25.25±4.55	18±5.33	14±3.22	4±3.29	5.2±1.72	12.8±4.4	34±0	20±0	14±0	16±0	18±0	42.8±10.38	32±6.93	10.8±5.98	17±5.06	25.8±5.34	-	-	-	-	-
Square and sports center	23±13.27	13.43±7.33	9.57±7.76	10.14±6.15	12.86±7.66	14.67±0.47	10.67±1.89	4±2.16	4.67±2.36	10±2.16	27.91±10.95	14.45±6.26	13.45±6.6	9.64±5.4	18.27±7.72	35.5±2.5	24±5	11.5±7.5	13±4	22.5±1.5	13.82±6.24	8.45±3.99	5.36±3.2	5.55±3.03	8.27±3.47
Park	30.5±14.65	16.79±9.22	13.71±8.02	15±7.4	15.5±7.62	15±0	12±0	3±0	4±0	11±0	24.6±6.53	15.8±3.19	8.8±4.02	9.8±2.99	14.8±4.53	39.57±9.5	26.57±6.61	13±5.36	17.35±5.03	22.22±5	15±4.82	8.64±4.27	6.36±1.55	5.36±1.92	9.64±4.25
High-rise residential	42.92±9.34	33.17±7.4	9.75±6.88	16.17±5.55	26.75±4.58	13.83±5.23	10.88±5.36	2.95±2.73	4.45±2	9.38±3.88	22±5.79	12.97±6.02	9.03±5.29	8.39±5.02	13.61±5.17	39.05±8.74	30.6±6.89	8.45±3.49	14.5±4.07	24.55±5.15	17.88±5.34	11.38±3.69	6.5±2.78	6.63±3.35	11.25±2.97
Low-rise residential	31.39±10.65	10.11±7.91	21.28±7.84	20.17±6.43	11.22±5.4	12.25±2.59	7.75±5.45	4.5±3.84	6.75±0.83	5.5±2.29	14.5±2.06	6.25±3.42	8.25±3.34	10.5±1.8	4±1	24.06±11.74	16.12±8.17	7.94±5.63	12.41±6.59	11.65±5.71	16.44±5.4	9.44±4.76	7±2.72	8.06±2.7	8.38±3.26
Transportation hub	23±10.42	7.33±4.5	15.67±8.06	11.33±7.72	11.67±2.87	9.6±5.24	8.2±5.04	1.4±1.36	2.8±1.6	6.8±4.58	18.67±4.19	5.33±2.87	13.33±6.6	9±5.1	9.67±0.94	30.67±3.3	24.67±4.11	6±0.82	10.33±1.25	20.33±2.49	27±0	9±0	18±0	14±0	13±0
Road	18.43±9.79	7.93±6.19	10.5±8.51	8.91±5.64	9.52±5.7	8.41±4.46	6.24±3.55	2.17±2.31	3.24±1.81	5.17±3.48	19±0	12±0	7±0	8±0	11±0	21.52±11.14	14.62±8.92	6.9±4.79	8.71±5.09	12.81±6.52	14.11±3.51	8±4.27	6.11±1.79	5.11±1.85	9±2.4
