# Supplementary material
Source: MDPI journal article supplement (https://www.mdpi.com/2071-1050/15/15/12045)
Supplement: s1 [file s1 › Annex S5.xlsx]

## Sheet: Zhanjiang
Plant list in the build-up area of Zhanjiang recorded in investigation
Latin name	Family name	Cultivated or Spontaneously growing	Life form
Dicranopteris pedata	Gleicheniaceae	Spontaneously growing	Herb
Lygodium microphyllum	Lygodiaceae	Spontaneously growing	Herb
Lygodium japonicum	Lygodiaceae	Spontaneously growing	Herb
Lindsaea ensifolia	Lindsaeaceae	Spontaneously growing	Herb
Pteris cretica	Pteridaceae	Spontaneously growing	Herb
Pteris ensiformis	Pteridaceae	Spontaneously growing	Herb
Pteris multifida	Pteridaceae	Spontaneously growing	Herb
Pteris semipinnata	Pteridaceae	Spontaneously growing	Herb
Pteris vittata	Pteridaceae	Spontaneously growing	Herb
Diplaziopsis cavaleriana	Diplaziopsidaceae	Spontaneously growing	Herb
Cyclosorus parasiticus	Thelypteridaceae	Spontaneously growing	Herb
Blechnum orientale	Blechnaceae	Spontaneously growing	Herb
Tectaria subtriphylla	Tectariaceae	Spontaneously growing	Herb
Nephrolepis biserrata	Nephrolepidaceae	Cultivated	Herb
Nephrolepis cordifolia	Nephrolepidaceae	Cultivated	Herb
Pyrrosia adnascens	Polypodiaceae	Spontaneously growing	Herb
Ophioglossum vulgatum	Ophioglossaceae	Spontaneously growing	Herb
Zamia furfuracea	Cycadaceae	Cultivated	Shrub
Cycas revoluta	Cycadaceae	Cultivated	Shrub
Araucaria cunninghamii	Araucariaceae	Cultivated	Tree
Pinus elliottii	Pinaceae	Cultivated	Tree
Keteleeria fortunei	Pinaceae	Cultivated	Tree
Pinus massoniana	Pinaceae	Cultivated	Tree
Juniperus chinensis	Cupressaceae	Cultivated	Tree, Shrub
Platycladus orientalis	Cupressaceae	Cultivated	Tree
Taxodium distichum	Cupressaceae	Cultivated	Tree, Shrub
Podocarpus pilgeri	Podocarpaceae	Cultivated	Tree
Podocarpus macrophyllus	Podocarpaceae	Cultivated	Shrub
Nageia nagi	Podocarpaceae	Cultivated	Tree
Houttuynia cordata	Saururaceae	Spontaneously growing	Herb
Peperomia pellucida	Piperaceae	Spontaneously growing	Herb
Piper sarmentosum	Piperaceae	Cultivated	Herb
Yulania × soulangeana	Magnoliaceae	Cultivated	Tree
Michelia alba	Magnoliaceae	Cultivated	Tree
Magnolia laevifolia	Magnoliaceae	Cultivated	Shrub
Magnolia figo	Magnoliaceae	Cultivated	Shrub
Annona squamosa	Annonaceae	Cultivated	Shrub
Desmos chinensis	Annonaceae	Spontaneously growing	Shrub
Uvaria littoralis	Annonaceae	Spontaneously growing	Shrub
Litsea glutinosa	Lauraceae	Spontaneously growing	Tree, Shrub
Cinnamomum kotoense	Lauraceae	Cultivated	Shrub
Cinnamomum camphora	Lauraceae	Cultivated	Tree
Cassytha filiformis	Lauraceae	Spontaneously growing	Tree
Machilus chinensis	Lauraceae	Spontaneously growing	Tree
Cinnamomum burmanni	Lauraceae	Cultivated	Tree
Actinodaphne pilosa	Lauraceae	Spontaneously growing	Shrub
Litsea cubeba	Lauraceae	Spontaneously growing	Shrub
Litsea rotundifolia	Lauraceae	Spontaneously growing	Shrub
Thaumatophyllum spruceanum	Araceae	Cultivated or Spontaneously growing	Herb
Syngonium podophyllum	Araceae	Cultivated	Herb
Alocasia cucullata	Araceae	Spontaneously growing	Herb
Epipremnum pinnatum	Araceae	Cultivated	Herb
Alocasia odora	Araceae	Cultivated	Herb
Colocasia esculenta	Araceae	Cultivated	Herb
Epipremnum aureum	Araceae	Cultivated	Herb
Xanthosoma sagittifolium	Araceae	Spontaneously growing	Herb
Pothos chinensis	Araceae	Spontaneously growing	Herb
Typhonium blumei	Araceae	Spontaneously growing	Herb
Amorphophallus konjac	Araceae	Spontaneously growing	Herb
Sagittaria trifolia	Alismataceae	Spontaneously growing	Herb
Dioscorea alata	Dioscoreaceae	Cultivated	Herb
Pandanus urophyllus	Pandanaceae	Cultivated	Shrub
Pandanus utilis	Pandanaceae	Cultivated	Tree, Shrub
Smilax china	Smilacaceae	Spontaneously growing	Shrub
Smilax glabra	Smilacaceae	Spontaneously growing	Shrub
Molineria capitulata	Hypoxidaceae	Cultivated	Tree
Iris tectorum	Iridaceae	Cultivated	Herb
Neomarica gracilis	Iridaceae	Cultivated	Herb
Hemerocallis fulva	Xanthorrhoeaceae	Cultivated	Herb
Aloe vera	Xanthorrhoeaceae	Cultivated	Herb
Hemerocallis citrina	Xanthorrhoeaceae	Cultivated	Herb
Dianella ensifolia	Xanthorrhoeaceae	Cultivated or Spontaneously growing	Herb
Zephyranthes candida	Amaryllidaceae	Cultivated	Herb
Hippeastrum striatum	Amaryllidaceae	Cultivated	Herb
Hymenocallis littoralis	Amaryllidaceae	Cultivated	Tree, Shrub, Herb
Zephyranthes minuta	Amaryllidaceae	Cultivated	Herb
Crinum asiaticum	Amaryllidaceae	Cultivated	Herb
Allium tuberosum	Amaryllidaceae	Cultivated	Herb
Allium fistulosum	Amaryllidaceae	Cultivated	Herb
Zephyranthes rosea	Amaryllidaceae	Cultivated	Herb
Cordyline fruticosa	Asparagaceae	Cultivated	Shrub, Herb
Asparagus cochinchinensis	Asparagaceae	Cultivated	Herb
Dracaena braunii	Asparagaceae	Cultivated	Tree
Dracaena fragrans	Asparagaceae	Cultivated	Shrub
Dracaena reflexa	Asparagaceae	Cultivated	Shrub
Dracaena cambodiana	Asparagaceae	Cultivated	Tree, Shrub
Dracaena draco	Asparagaceae	Cultivated	Shrub
Dracaena marginata	Asparagaceae	Cultivated	Shrub
Furcraea foetida	Asparagaceae	Cultivated	Herb
Ophiopogon bodinieri	Asparagaceae	Cultivated	Herb
Sansevieria trifasciata	Asparagaceae	Cultivated	Shrub, Herb
Ophiopogon japonicus	Asparagaceae	Cultivated	Herb
Rohdea japonica	Asparagaceae	Cultivated	Herb
Chlorophytum comosum	Asparagaceae	Cultivated	Herb
Agave americana	Asparagaceae	Cultivated	Herb
Butia capitata	Arecaceae	Cultivated	Shrub
Chamaedorea elegans	Arecaceae	Cultivated	Shrub
Cocos nucifera	Arecaceae	Cultivated	Tree, Shrub
Dypsis decaryi	Arecaceae	Cultivated	Tree
Elaeis guineensis	Arecaceae	Cultivated	Tree
Phoenix sylvestris	Arecaceae	Cultivated	Tree, Shrub
Ravenea rivularis	Arecaceae	Cultivated	Tree
Roystonea regia	Arecaceae	Cultivated	Tree
Washingtonia filifera	Arecaceae	Cultivated	Tree
Borassus flabellifer	Arecaceae	Cultivated	Tree
Hyophorbe lagenicaulis	Arecaceae	Cultivated	Tree
Phoenix canariensis	Arecaceae	Cultivated	Tree, Shrub
Phoenix roebelenii	Arecaceae	Cultivated	Shrub, Herb
Syagrus romanzoffiana	Arecaceae	Cultivated	Tree
Wodyetia bifurcata	Arecaceae	Cultivated	Tree, Shrub
Dypsis lutescens	Arecaceae	Cultivated	Tree, Shrub
Rhapis excelsa	Arecaceae	Cultivated	Shrub
Archontophoenix alexandrae	Arecaceae	Cultivated	Tree
Areca triandra	Arecaceae	Cultivated	Shrub
Bismarckia nobilis	Arecaceae	Cultivated	Tree
Livistona chinensis	Arecaceae	Cultivated	Tree, Shrub
Arenga pinnata	Arecaceae	Cultivated	Tree
Caryota mitis	Arecaceae	Cultivated	Tree, Shrub
Caryota maxima	Arecaceae	Cultivated	Tree
Phoenix loureiroi	Arecaceae	Cultivated	Tree
Tradescantia spathacea	Commelinaceae	Cultivated	Herb
Commelina benghalensis	Commelinaceae	Spontaneously growing	Herb
Commelina communis	Commelinaceae	Spontaneously growing	Herb
Murdannia bracteata	Commelinaceae	Spontaneously growing	Herb
Murdannia loriformis	Commelinaceae	Spontaneously growing	Herb
Musa acuminata	Musaceae	Cultivated	Herb
Musa basjoo	Musaceae	Cultivated	Herb
Canna indica	Cannaceae	Cultivated	Herb
Phrynium pubinerve	Marantaceae	Cultivated	Herb
Stromanthe thalia	Marantaceae	Cultivated	Herb
Zingiber officinale	Zingiberaceae	Cultivated	Herb
Alpinia japonica	Zingiberaceae	Cultivated	Herb
Alpinia zerumbet	Zingiberaceae	Cultivated	Herb
Kaempferia galanga	Zingiberaceae	Cultivated	Herb
Kyllinga nemoralis	Cyperaceae	Spontaneously growing	Herb
Cyperus papyrus	Cyperaceae	Spontaneously growing	Herb
Cyperus rotundus	Cyperaceae	Spontaneously growing	Herb
Cyperus glomeratus	Cyperaceae	Spontaneously growing	Herb
Cyperus involucratus	Cyperaceae	Cultivated	Herb
Cyperus surinamensis	Cyperaceae	Spontaneously growing	Herb
Cyperus tenuispica	Cyperaceae	Spontaneously growing	Herb
Kyllinga bulbosa	Cyperaceae	Spontaneously growing	Herb
Pycreus flavidus	Cyperaceae	Spontaneously growing	Herb
Bulbostylis barbata	Cyperaceae	Spontaneously growing	Herb
Cyperus compressus	Cyperaceae	Spontaneously growing	Herb
Cyperus difformis	Cyperaceae	Spontaneously growing	Herb
Cyperus malaccensis	Cyperaceae	Spontaneously growing	Herb
Fimbristylis dichotoma	Cyperaceae	Spontaneously growing	Herb
Fimbristylis littoralis	Cyperaceae	Spontaneously growing	Herb
Kyllinga brevifolia	Cyperaceae	Spontaneously growing	Herb
Scleria ciliaris	Cyperaceae	Spontaneously growing	Herb
Cyperus iria	Cyperaceae	Spontaneously growing	Herb
Axonopus compressus	Poaceae	Cultivated or Spontaneously growing	Herb
Leersia hexandra	Poaceae	Spontaneously growing	Herb
Zoysia japonica	Poaceae	Cultivated or Spontaneously growing	Herb
Bambusa multiplex	Poaceae	Cultivated	Herb
Bambusa tuldoides	Poaceae	Cultivated	Shrub
Phyllostachys nigra	Poaceae	Cultivated	Herb
Aristida adscensionis	Poaceae	Spontaneously growing	Herb
Aristida chinensis	Poaceae	Spontaneously growing	Herb
Bambusa vulgaris	Poaceae	Cultivated	Herb
Brachiaria subquadripara	Poaceae	Spontaneously growing	Herb
Cenchrus echinatus	Poaceae	Spontaneously growing	Herb
Chloris formosana	Poaceae	Spontaneously growing	Herb
Chloris virgata	Poaceae	Cultivated	Herb
Chrysopogon aciculatus	Poaceae	Spontaneously growing	Herb
Cyrtococcum patens	Poaceae	Spontaneously growing	Herb
Digitaria ciliaris	Poaceae	Spontaneously growing	Herb
Digitaria radicosa	Poaceae	Spontaneously growing	Herb
Digitaria sanguinalis	Poaceae	Spontaneously growing	Herb
Echinochloa colona	Poaceae	Spontaneously growing	Herb
Echinochloa crus-galli	Poaceae	Spontaneously growing	Herb
Eragrostis amabilis	Poaceae	Spontaneously growing	Herb
Eragrostis zeylanica	Poaceae	Spontaneously growing	Herb
Eremochloa ciliaris	Poaceae	Spontaneously growing	Herb
Eriochloa procera	Poaceae	Spontaneously growing	Herb
Ischaemum barbatum	Poaceae	Spontaneously growing	Herb
Leptochloa panicea	Poaceae	Spontaneously growing	Herb
Neyraudia reynaudiana	Poaceae	Spontaneously growing	Herb
Oplismenus undulatifolius	Poaceae	Spontaneously growing	Herb
Ottochloa nodosa	Poaceae	Spontaneously growing	Herb
Panicum brevifolium	Poaceae	Spontaneously growing	Herb
Paspalum conjugatum	Poaceae	Spontaneously growing	Herb
Paspalum distichum	Poaceae	Spontaneously growing	Herb
Paspalum scrobiculatum	Poaceae	Spontaneously growing	Herb
Paspalum thunbergii	Poaceae	Spontaneously growing	Herb
Pennisetum purpureum	Poaceae	Spontaneously growing	Herb
Sacciolepis indica	Poaceae	Spontaneously growing	Herb
Schizachyrium sanguineum	Poaceae	Spontaneously growing	Herb
Sporobolus hancei	Poaceae	Spontaneously growing	Herb
Stipa capillata	Poaceae	Spontaneously growing	Herb
Cynodon dactylon	Poaceae	Cultivated or Spontaneously growing	Herb
Dactyloctenium aegyptium	Poaceae	Spontaneously growing	Herb
Eleusine indica	Poaceae	Spontaneously growing	Herb
Eragrostis ferruginea	Poaceae	Spontaneously growing	Herb
Imperata cylindrica	Poaceae	Spontaneously growing	Herb
Isachne globosa	Poaceae	Spontaneously growing	Herb
Leptochloa chinensis	Poaceae	Spontaneously growing	Herb
Melinis repens	Poaceae	Spontaneously growing	Herb
Oplismenus compositus	Poaceae	Spontaneously growing	Herb
Panicum repens	Poaceae	Spontaneously growing	Herb
Rottboellia cochinchinensis	Poaceae	Spontaneously growing	Herb
Setaria pumila	Poaceae	Spontaneously growing	Herb
Setaria viridis	Poaceae	Spontaneously growing	Herb
Eragrostis pilosa	Poaceae	Spontaneously growing	Herb
Oryza sativa	Poaceae	Cultivated	Herb
Saccharum officinarum	Poaceae	Cultivated	Shrub
Zea mays	Poaceae	Cultivated	Herb
Miscanthus sinensis	Poaceae	Spontaneously growing	Herb
Stephania longa	Menispermaceae	Spontaneously growing	Herb
Nelumbo nucifera	Nelumbonaceae	Cultivated	Herb
Helicia reticulata	Proteaceae	Spontaneously growing	Shrub
Grevillea robusta	Proteaceae	Cultivated	Tree
Dillenia indica	Dilleniaceae	Cultivated	Tree
Loropetalum chinense	Hamamelidaceae	Cultivated	Shrub
Cissus repens	Vitaceae	Spontaneously growing	Herb
Vitis vinifera	Vitaceae	Cultivated	Herb
Adenanthera microsperma	Fabaceae	Cultivated	Tree
Mimosa invisa	Fabaceae	Spontaneously growing	Shrub, Herb
Leucaena leucocephala	Fabaceae	Cultivated	Tree
Acacia auriculiformis	Fabaceae	Cultivated	Tree
Acacia holosericea	Fabaceae	Cultivated	Tree, Shrub
Acacia mangium	Fabaceae	Cultivated	Tree
Archidendron turgidum	Fabaceae	Cultivated	Tree
Sindora tonkinensis	Fabaceae	Cultivated	Tree
Dalbergia odorifera	Fabaceae	Cultivated	Tree, Shrub
Pterocarpus indicus	Fabaceae	Cultivated	Tree
Pithecellobium dulce	Fabaceae	Cultivated	Tree
Dunbaria punctata	Fabaceae	Spontaneously growing	Herb
Indigofera hirsuta	Fabaceae	Spontaneously growing	Shrub
Macroptilium atropurpureum	Fabaceae	Spontaneously growing	Herb
Mimosa bimucronata	Fabaceae	Spontaneously growing	Tree, Shrub
Sesbania cannabina	Fabaceae	Spontaneously growing	Herb
Stylosanthes guianensis	Fabaceae	Spontaneously growing	Herb
Lablab purpureus	Fabaceae	Cultivated	Herb
Vigna unguiculata	Fabaceae	Cultivated or Spontaneously growing	Herb
Aeschynomene indica	Fabaceae	Spontaneously growing	Shrub
Cajanus scarabaeoides	Fabaceae	Spontaneously growing	Herb
Chamaecrista mimosoides	Fabaceae	Spontaneously growing	Herb
Desmodium triflorum	Fabaceae	Spontaneously growing	Herb
Falcataria moluccana	Fabaceae	Cultivated	Herb
Phyllodium elegans	Fabaceae	Spontaneously growing	Shrub
Pueraria phaseoloides	Fabaceae	Spontaneously growing	Herb
Senna tora	Fabaceae	Spontaneously growing	Herb
Tadehagi triquetrum	Fabaceae	Spontaneously growing	Shrub
Zornia gibbosa	Fabaceae	Spontaneously growing	Herb
Alysicarpus vaginalis	Fabaceae	Spontaneously growing	Herb
Arachis hypogaea	Fabaceae	Cultivated	Herb
Glycine max	Fabaceae	Cultivated	Herb
Vigna radiata	Fabaceae	Cultivated	Herb
Cassia fistula	Fabaceae	Cultivated	Tree
Erythrina crista-galli	Fabaceae	Cultivated	Tree, Shrub
Senna surattensis	Fabaceae	Cultivated	Tree, Shrub
Ormosia pinnata	Fabaceae	Cultivated	Tree
Bauhinia purpurea	Fabaceae	Cultivated	Tree
Bauhinia variegata	Fabaceae	Cultivated	Tree
Mimosa pudica	Fabaceae	Spontaneously growing	Herb
Senna siamea	Fabaceae	Cultivated	Tree
Acacia confusa	Fabaceae	Cultivated	Tree
Indigofera endecaphylla	Fabaceae	Cultivated	Herb
Arachis duranensis	Fabaceae	Cultivated	Herb
Albizia lebbeck	Fabaceae	Cultivated	Tree
Caesalpinia pulcherrima	Fabaceae	Cultivated	Shrub
Caesalpinia sappan	Fabaceae	Cultivated	Tree
Calliandra haematocephala	Fabaceae	Cultivated	Shrub
Delonix regia	Fabaceae	Cultivated	Tree, Shrub
Erythrina variegata	Fabaceae	Cultivated	Tree
Lysidice rhodostegia	Fabaceae	Cultivated	Shrub
Eriobotrya japonica	Rosaceae	Cultivated	Tree
Amygdalus persica	Rosaceae	Cultivated	Tree
Rhaphiolepis indica	Rosaceae	Spontaneously growing	Shrub
Cerasus serrulata	Rosaceae	Cultivated	Tree
Sageretia thea	Rhamnaceae	Spontaneously growing	Shrub
Ziziphus jujuba	Rhamnaceae	Cultivated	Tree
Ulmus parvifolia	Ulmaceae	Cultivated	Tree
Celtis sinensis	Cannabaceae	Cultivated or Spontaneously growing	Tree
Celtis timorensis	Cannabaceae	Spontaneously growing	Tree
Trema tomentosa	Cannabaceae	Spontaneously growing	Tree
Artocarpus altilis	Moraceae	Cultivated	Tree
Artocarpus heterophyllus	Moraceae	Cultivated	Tree
Streblus asper	Moraceae	Cultivated or Spontaneously growing	Tree, Shrub
Ficus binnendijkii	Moraceae	Cultivated	Tree, Shrub
Antiaris toxicaria	Moraceae	Cultivated	Tree
Ficus benjamina	Moraceae	Cultivated	Tree, Shrub
Ficus hispida	Moraceae	Spontaneously growing	Tree, Shrub
Ficus maclellandii	Moraceae	Cultivated	Tree, Shrub
Ficus microcarpa	Moraceae	Cultivated or Spontaneously growing	Tree, Shrub
Ficus religiosa	Moraceae	Cultivated	Tree
Ficus altissima	Moraceae	Cultivated	Tree
Ficus elastica	Moraceae	Cultivated	Tree
Ficus pandurata	Moraceae	Cultivated	Tree, Shrub
Ficus subpisocarpa	Moraceae	Cultivated	Tree
Ficus virens	Moraceae	Cultivated	Tree, Shrub
Morus alba	Moraceae	Cultivated	Tree, Shrub
Ficus hirta	Moraceae	Spontaneously growing	Tree
Malaisia scandens	Moraceae	Spontaneously growing	Herb
Ficus pumila	Moraceae	Spontaneously growing	Shrub
Broussonetia papyrifera	Moraceae	Spontaneously growing	Tree, Shrub
Pilea cadierei	Urticaceae	Cultivated	Herb
Pouzolzia zeylanica	Urticaceae	Spontaneously growing	Herb
Pilea microphylla	Urticaceae	Spontaneously growing	Herb
Casuarina equisetifolia	Casuarinaceae	Cultivated	Tree
Lagenaria siceraria	Cucurbitaceae	Cultivated	Herb
Cucumis melo	Cucurbitaceae	Cultivated	Herb
Zehneria japonica	Cucurbitaceae	Spontaneously growing	Herb
Benincasa hispida	Cucurbitaceae	Cultivated	Herb
Citrullus lanatus	Cucurbitaceae	Spontaneously growing	Herb
Cucurbita moschata	Cucurbitaceae	Cultivated or Spontaneously growing	Herb
Luffa cylindrica	Cucurbitaceae	Cultivated	Herb
Momordica charantia	Cucurbitaceae	Spontaneously growing	Herb
Averrhoa carambola	Oxalidaceae	Cultivated	Tree
Oxalis corniculata	Oxalidaceae	Spontaneously growing	Herb
Oxalis debilis	Oxalidaceae	Spontaneously growing	Herb
Elaeocarpus chinensis	Elaeocarpaceae	Cultivated	Tree
Elaeocarpus sylvestris	Elaeocarpaceae	Cultivated	Tree
Elaeocarpus hainanensis	Elaeocarpaceae	Cultivated	Tree
Elaeocarpus balansae	Elaeocarpaceae	Cultivated	Tree
Elaeocarpus rugosus	Elaeocarpaceae	Cultivated	Tree
Carallia brachiata	Rhizophoraceae	Spontaneously growing	Tree
Aleurites moluccanus	Euphorbiaceae	Cultivated	Tree
Acalypha wilkesiana	Euphorbiaceae	Cultivated	Shrub
Codiaeum variegatum	Euphorbiaceae	Cultivated	Tree, Shrub, Herb
Euphorbia cyathophora	Euphorbiaceae	Spontaneously growing	Herb
Euphorbia antiquorum	Euphorbiaceae	Cultivated	Tree, Shrub
Excoecaria cochinchinensis	Euphorbiaceae	Cultivated	Shrub
Triadica sebifera	Euphorbiaceae	Cultivated	Tree
Alchornea rugosa	Euphorbiaceae	Spontaneously growing	Herb
Euphorbia heterophylla	Euphorbiaceae	Spontaneously growing	Herb
Euphorbia prostrata	Euphorbiaceae	Spontaneously growing	Herb
Euphorbia thymifolia	Euphorbiaceae	Spontaneously growing	Herb
Microstachys chamaelea	Euphorbiaceae	Spontaneously growing	Herb
Croton crassifolius	Euphorbiaceae	Spontaneously growing	Shrub
Euphorbia hirta	Euphorbiaceae	Spontaneously growing	Herb
Euphorbia humifusa	Euphorbiaceae	Spontaneously growing	Herb
Euphorbia hypericifolia	Euphorbiaceae	Spontaneously growing	Herb
Euphorbia maculata	Euphorbiaceae	Spontaneously growing	Herb
Mallotus apelta	Euphorbiaceae	Spontaneously growing	Shrub
Mallotus barbatus	Euphorbiaceae	Spontaneously growing	Tree
Ricinus communis	Euphorbiaceae	Spontaneously growing	Shrub
Acalypha australis	Euphorbiaceae	Spontaneously growing	Herb
Manihot esculenta	Euphorbiaceae	Cultivated or Spontaneously growing	Shrub
Jatropha integerrima	Euphorbiaceae	Cultivated	Tree, Shrub
Jatropha curcas	Euphorbiaceae	Cultivated	Tree
Euphorbia milii	Euphorbiaceae	Cultivated	Shrub
Euphorbia pulcherrima	Euphorbiaceae	Cultivated	Herb
Euphorbia tirucalli	Euphorbiaceae	Cultivated	Herb
Flueggea virosa	Phyllanthaceae	Spontaneously growing	Shrub
Bridelia tomentosa	Phyllanthaceae	Spontaneously growing	Tree
Antidesma bunius	Phyllanthaceae	Cultivated	Tree
Breynia disticha	Phyllanthaceae	Cultivated	Shrub
Glochidion lanceolarium	Phyllanthaceae	Spontaneously growing	Shrub
Bischofia javanica	Phyllanthaceae	Cultivated	Tree
Phyllanthus urinaria	Phyllanthaceae	Spontaneously growing	Herb
Breynia fruticosa	Phyllanthaceae	Spontaneously growing	Shrub
Phyllanthus niruri	Phyllanthaceae	Spontaneously growing	Herb
Antidesma ghaesembilla	Phyllanthaceae	Spontaneously growing	Shrub
Aporosa octandra	Phyllanthaceae	Spontaneously growing	Tree, Shrub
Passiflora foetida	Passifloraceae	Spontaneously growing	Herb
Homalium cochinchinense	Salicaceae	Cultivated	Tree
Salix babylonica	Salicaceae	Cultivated	Tree
Scolopia chinensis	Salicaceae	Cultivated	Tree
Garcinia spicata	Clusiaceae	Cultivated	Shrub
Garcinia mangostana	Clusiaceae	Cultivated	Tree
Hypericum japonicum	Hypericaceae	Spontaneously growing	Herb
Combretum indicum	Combretaceae	Cultivated	Tree, Shrub, Herb
Terminalia catappa	Combretaceae	Cultivated	Tree, Shrub
Terminalia neotaliala	Combretaceae	Cultivated	Tree
Terminalia muelleri	Combretaceae	Cultivated	Tree
Cuphea hyssopifolia	Lythraceae	Cultivated	Shrub, Herb
Lagerstroemia indica	Lythraceae	Cultivated	Tree, Shrub
Lagerstroemia speciosa	Lythraceae	Cultivated	Tree
Punica granatum	Lythraceae	Cultivated	Tree
Cuphea carthagenensis	Lythraceae	Spontaneously growing	Herb
Ludwigia adscendens	Onagraceae	Spontaneously growing	Herb
Ludwigia hyssopifolia	Onagraceae	Spontaneously growing	Herb
Ludwigia octovalvis	Onagraceae	Cultivated or Spontaneously growing	Herb
Ludwigia prostrata	Onagraceae	Spontaneously growing	Herb
Eugenia uniflora	Myrtaceae	Cultivated	Shrub
Psidium guajava	Myrtaceae	Cultivated	Shrub
Syzygium jambos	Myrtaceae	Cultivated or Spontaneously growing	Shrub
Syzygium samarangense	Myrtaceae	Cultivated	Tree, Shrub
Xanthostemon chrysanthus	Myrtaceae	Cultivated	Tree, Shrub
Callistemon viminalis	Myrtaceae	Cultivated	Tree
Eucalyptus robusta	Myrtaceae	Cultivated	Tree
Rhodomyrtus tomentosa	Myrtaceae	Cultivated or Spontaneously growing	Shrub
Syzygium myrtifolium	Myrtaceae	Cultivated	Tree, Shrub
Eucalyptus camaldulensis	Myrtaceae	Cultivated	Tree
Eucalyptus exserta	Myrtaceae	Cultivated	Tree
Eucalyptus tereticornis	Myrtaceae	Cultivated	Tree
Melaleuca bracteata	Myrtaceae	Cultivated	Shrub
Syzygium nervosum	Myrtaceae	Cultivated	Tree
Eucalyptus rostrata	Myrtaceae	Cultivated	Tree
Baeckea frutescens	Myrtaceae	Spontaneously growing	Shrub
Syzygium bullockii	Myrtaceae	Spontaneously growing	Shrub
Plinia cauliflora	Myrtaceae	Cultivated	Shrub
Callistemon rigidus	Myrtaceae	Cultivated	Tree
Melaleuca cajuputi	Myrtaceae	Cultivated	Tree
Melastoma malabathricum	Melastomataceae	Cultivated or Spontaneously growing	Shrub
Tibouchina semidecandra	Melastomataceae	Cultivated	Shrub
Memecylon scutellatum	Melastomataceae	Spontaneously growing	Shrub
Melastoma dodecandrum	Melastomataceae	Spontaneously growing	Shrub
Canarium pimela	Burseraceae	Cultivated	Tree
Canarium album	Burseraceae	Cultivated	Tree
Mangifera persiciforma	Anacardiaceae	Cultivated	Tree, Shrub
Dracontomelon duperreanum	Anacardiaceae	Cultivated	Tree
Rhus chinensis	Anacardiaceae	Spontaneously growing	Shrub
Toxicodendron succedaneum	Anacardiaceae	Spontaneously growing	Shrub
Mangifera indica	Anacardiaceae	Cultivated	Tree
Dimocarpus longan	Sapindaceae	Cultivated	Tree
Koelreuteria bipinnata	Sapindaceae	Cultivated	Tree
Litchi chinensis	Sapindaceae	Cultivated	Tree
Murraya paniculata	Rutaceae	Cultivated	Shrub
Citrus maxima	Rutaceae	Cultivated or Spontaneously growing	Tree
Clausena lansium	Rutaceae	Spontaneously growing	Tree, Shrub
Tetradium glabrifolium	Rutaceae	Spontaneously growing	Tree
Zanthoxylum beecheyanum	Rutaceae	Cultivated	Shrub
Atalantia buxifolia	Rutaceae	Spontaneously growing	Shrub
Melicope pteleifolia	Rutaceae	Spontaneously growing	Tree
Zanthoxylum avicennae	Rutaceae	Cultivated	Tree
Glycosmis pentaphylla	Rutaceae	Spontaneously growing	Shrub
Citrus limon	Rutaceae	Cultivated	Tree
Citrus reticulata	Rutaceae	Cultivated or Spontaneously growing	Shrub
Brucea javanica	Simaroubaceae	Spontaneously growing	Shrub
Swietenia mahagoni	Meliaceae	Cultivated	Tree
Chukrasia tabularis	Meliaceae	Cultivated	Tree
Khaya senegalensis	Meliaceae	Cultivated	Tree
Toona ciliata	Meliaceae	Cultivated	Tree
Toona sinensis	Meliaceae	Cultivated	Tree
Aglaia odorata	Meliaceae	Cultivated	Shrub
Melia azedarach	Meliaceae	Spontaneously growing	Tree, Shrub
Muntingia calabura	Muntingiaceae	Cultivated	Tree, Shrub
Bombax ceiba	Malvaceae	Cultivated	Tree
Ceiba speciosa	Malvaceae	Cultivated	Tree
Hibiscus rosa-sinensis	Malvaceae	Cultivated	Shrub
Abutilon indicum	Malvaceae	Spontaneously growing	Shrub, Herb
Corchorus aestuans	Malvaceae	Spontaneously growing	Herb
Helicteres angustifolia	Malvaceae	Spontaneously growing	Shrub
Malvastrum coromandelianum	Malvaceae	Spontaneously growing	Herb
Melochia corchorifolia	Malvaceae	Spontaneously growing	Herb
Microcos paniculata	Malvaceae	Cultivated or Spontaneously growing	Shrub
Sida acuta	Malvaceae	Spontaneously growing	Shrub, Herb
Sida rhombifolia	Malvaceae	Spontaneously growing	Shrub, Herb
Triumfetta rhomboidea	Malvaceae	Spontaneously growing	Herb
Urena lobata	Malvaceae	Spontaneously growing	Shrub
Waltheria indica	Malvaceae	Spontaneously growing	Herb
Sterculia foetida	Malvaceae	Cultivated	Tree
Pachira aquatica	Malvaceae	Cultivated	Tree
Sterculia monosperma	Malvaceae	Cultivated	Tree
Malvaviscus arboreus	Malvaceae	Cultivated	Shrub
Sterculia lanceolata	Malvaceae	Cultivated	Tree
Hibiscus tiliaceus	Malvaceae	Cultivated	Tree
Aquilaria sinensis	Thymelaeaceae	Cultivated	Tree
Moringa drouhardii	Moringaceae	Cultivated	Tree
Moringa oleifera	Moringaceae	Cultivated	Tree
Carica papaya	Caricaceae	Cultivated or Spontaneously growing	Tree
Cleome rutidosperma	Cleomaceae	Spontaneously growing	Herb
Cleome viscosa	Cleomaceae	Spontaneously growing	Herb
Brassica napus	Brassicaceae	Cultivated	Herb
Rorippa indica	Brassicaceae	Spontaneously growing	Herb
Brassica juncea	Brassicaceae	Cultivated	Herb
Brassica rapa	Brassicaceae	Cultivated	Herb
Cardamine hirsuta	Brassicaceae	Spontaneously growing	Herb
Santalum album	Santalaceae	Cultivated	Tree
Plumbago zeylanica	Plumbaginaceae	Spontaneously growing	Shrub, Herb
Polygonum lapathifolium	Polygonaceae	Spontaneously growing	Herb
Persicaria chinensis	Polygonaceae	Spontaneously growing	Herb
Polygonum plebeium	Polygonaceae	Spontaneously growing	Herb
Persicaria hydropiper	Polygonaceae	Spontaneously growing	Herb
Rumex japonicus	Polygonaceae	Spontaneously growing	Herb
Drymaria cordata	Caryophyllaceae	Spontaneously growing	Herb
Dianthus caryophyllus	Caryophyllaceae	Cultivated	Herb
Achyranthes aspera	Amaranthaceae	Spontaneously growing	Herb
Alternanthera philoxeroides	Amaranthaceae	Spontaneously growing	Herb
Gomphrena globosa	Amaranthaceae	Cultivated	Herb
Alternanthera bettzickiana	Amaranthaceae	Cultivated	Herb
Gomphrena celosioides	Amaranthaceae	Spontaneously growing	Herb
Alternanthera paronychioides	Amaranthaceae	Spontaneously growing	Herb
Amaranthus spinosus	Amaranthaceae	Spontaneously growing	Herb
Cyathula prostrata	Amaranthaceae	Spontaneously growing	Herb
Alternanthera brasiliana	Amaranthaceae	Cultivated	Herb
Alternanthera sessilis	Amaranthaceae	Cultivated	Herb
Amaranthus viridis	Amaranthaceae	Spontaneously growing	Herb
Celosia argentea	Amaranthaceae	Spontaneously growing	Herb
Chenopodium album	Amaranthaceae	Spontaneously growing	Herb
Phytolacca acinosa	Phytolaccaceae	Spontaneously growing	Herb
Bougainvillea spectabilis	Nyctaginaceae	Cultivated	Shrub, Herb
Boerhavia diffusa	Nyctaginaceae	Spontaneously growing	Herb
Mirabilis jalapa	Nyctaginaceae	Cultivated	Herb
Mollugo stricta	Molluginaceae	Spontaneously growing	Herb
Anredera cordifolia	Basellaceae	Spontaneously growing	Herb
Talinum paniculatum	Talinaceae	Spontaneously growing	Herb
Portulaca grandiflora	Portulacaceae	Cultivated	Tree, Herb
Portulaca oleracea	Portulacaceae	Cultivated or Spontaneously growing	Herb
Hylocereus undatus	Cactaceae	Cultivated	Herb
Impatiens balsamina	Balsaminaceae	Spontaneously growing	Herb
Barringtonia racemosa	Lecythidaceae	Cultivated	Tree
Barringtonia macrostachya	Lecythidaceae	Cultivated	Tree
Eurya loquaiana	Pentaphylacaceae	Spontaneously growing	Shrub
Manilkara zapota	Sapotaceae	Cultivated	Tree
Pouteria campechiana	Sapotaceae	Cultivated	Tree
Diospyros kaki	Ebenaceae	Cultivated	Tree
Myrsine linearis	Primulaceae	Spontaneously growing	Shrub
Embelia laeta	Primulaceae	Spontaneously growing	Shrub, Herb
Ardisia elliptica	Primulaceae	Cultivated	Shrub
Camellia azalea	Theaceae	Cultivated	Tree
Camellia polyodonta	Theaceae	Cultivated	Shrub
Camellia japonica	Theaceae	Cultivated	Shrub
Camellia oleifera	Theaceae	Cultivated	Tree
Symplocos poilanei	Symplocaceae	Spontaneously growing	Tree
Symplocos racemosa	Symplocaceae	Spontaneously growing	Shrub
Rhododendron pulchrum	Ericaceae	Cultivated	Shrub
Mitracarpus hirtus	Rubiaceae	Spontaneously growing	Herb
Ixora chinensis	Rubiaceae	Cultivated	Tree, Shrub
Gardenia jasminoides	Rubiaceae	Cultivated	Tree
Psychotria serpens	Rubiaceae	Spontaneously growing	Herb
Oldenlandia auricularia	Rubiaceae	Spontaneously growing	Herb
Psychotria asiatica	Rubiaceae	Spontaneously growing	Shrub
Richardia scabra	Rubiaceae	Spontaneously growing	Herb
Benkara depauperata	Rubiaceae	Spontaneously growing	Herb
Dentella repens	Rubiaceae	Spontaneously growing	Herb
Spermacoce alata	Rubiaceae	Spontaneously growing	Herb
Diplospora dubia	Rubiaceae	Spontaneously growing	Shrub
Morinda parvifolia	Rubiaceae	Spontaneously growing	Herb
Oldenlandia corymbosa	Rubiaceae	Spontaneously growing	Herb
Oldenlandia diffusa	Rubiaceae	Spontaneously growing	Herb
Oldenlandia pinifolia	Rubiaceae	Spontaneously growing	Herb
Paederia foetida	Rubiaceae	Spontaneously growing	Herb
Spermacoce verticillata	Rubiaceae	Spontaneously growing	Herb
Hamelia patens	Rubiaceae	Spontaneously growing	Shrub
Ixora coccinea	Rubiaceae	Cultivated	Shrub
Mussaenda pubescens	Rubiaceae	Spontaneously growing	Shrub
Fagraea ceilanica	Gentianaceae	Cultivated	Shrub
Asclepias curassavica	Apocynaceae	Spontaneously growing	Herb
Gymnema sylvestre	Apocynaceae	Spontaneously growing	Shrub
Rauvolfia verticillata	Apocynaceae	Spontaneously growing	Shrub
Alstonia scholaris	Apocynaceae	Cultivated	Tree
Wrightia pubescens	Apocynaceae	Spontaneously growing	Tree
Allamanda cathartica	Apocynaceae	Cultivated	Shrub
Allamanda schottii	Apocynaceae	Cultivated	Shrub
Catharanthus roseus	Apocynaceae	Cultivated or Spontaneously growing	Shrub, Herb
Nerium oleander	Apocynaceae	Cultivated	Tree
Plumeria rubra	Apocynaceae	Cultivated	Tree, Shrub
Tabernaemontana divaricata	Apocynaceae	Cultivated	Shrub
Bothriospermum chinense	Boraginaceae	Spontaneously growing	Herb
Ehretia microphylla	Boraginaceae	Cultivated	Shrub
Ipomoea nil	Convolvulaceae	Spontaneously growing	Herb
Ipomoea obscura	Convolvulaceae	Spontaneously growing	Herb
Ipomoea triloba	Convolvulaceae	Spontaneously growing	Herb
Merremia umbellata	Convolvulaceae	Spontaneously growing	Herb
Argyreia acuta	Convolvulaceae	Spontaneously growing	Herb
Cuscuta australis	Convolvulaceae	Spontaneously growing	Herb
Merremia hederacea	Convolvulaceae	Spontaneously growing	Herb
Ipomoea aquatica	Convolvulaceae	Cultivated or Spontaneously growing	Herb
Ipomoea batatas	Convolvulaceae	Cultivated or Spontaneously growing	Herb
Ipomoea pes-caprae	Convolvulaceae	Spontaneously growing	Herb
Ipomoea cairica	Convolvulaceae	Spontaneously growing	Herb
Ipomoea purpurea	Convolvulaceae	Spontaneously growing	Herb
Ipomoea quamoclit	Convolvulaceae	Spontaneously growing	Herb
Physalis angulata	Solanaceae	Spontaneously growing	Herb
Petunia hybrida	Solanaceae	Cultivated	Herb
Brunfelsia brasiliensis	Solanaceae	Cultivated	Shrub
Solanum americanum	Solanaceae	Spontaneously growing	Herb
Lycianthes biflora	Solanaceae	Spontaneously growing	Herb
Capsicum annuum	Solanaceae	Cultivated or Spontaneously growing	Herb
Solanum melongena	Solanaceae	Cultivated	Herb
Solanum torvum	Solanaceae	Spontaneously growing	Herb
Lycium chinense	Solanaceae	Cultivated	Shrub
Cestrum nocturnum	Solanaceae	Cultivated	Shrub
Jasminum elongatum	Oleaceae	Spontaneously growing	Shrub
Jasminum sambac	Oleaceae	Cultivated	Shrub
Olea europaea	Oleaceae	Cultivated	Tree
Jasminum nervosum	Oleaceae	Spontaneously growing	Herb
Olea dioica	Oleaceae	Spontaneously growing	Tree
Osmanthus fragrans	Oleaceae	Cultivated	Tree
Ligustrum sinense	Oleaceae	Cultivated or Spontaneously growing	Shrub
Scoparia dulcis	Plantaginaceae	Spontaneously growing	Herb
Plantago asiatica	Plantaginaceae	Spontaneously growing	Herb
Lindernia mollis	Linderniaceae	Spontaneously growing	Herb
Torenia fordii	Linderniaceae	Spontaneously growing	Herb
Lindernia anagallis	Linderniaceae	Spontaneously growing	Herb
Lindernia antipoda	Linderniaceae	Spontaneously growing	Herb
Lindernia crustacea	Linderniaceae	Spontaneously growing	Herb
Lindernia procumbens	Linderniaceae	Spontaneously growing	Herb
Lindernia rotundifolia	Linderniaceae	Spontaneously growing	Herb
Lindernia ruellioides	Linderniaceae	Spontaneously growing	Herb
Torenia fournieri	Linderniaceae	Cultivated	Herb
Orthosiphon aristatus	Lamiaceae	Cultivated	Herb
Tectona grandis	Lamiaceae	Cultivated	Tree
Vitex negundo	Lamiaceae	Spontaneously growing	Shrub
Vitex quinata	Lamiaceae	Spontaneously growing	Tree
Anisomeles indica	Lamiaceae	Spontaneously growing	Herb
Clerodendrum cyrtophyllum	Lamiaceae	Spontaneously growing	Herb
Clerodendrum fortunatum	Lamiaceae	Spontaneously growing	Herb
Mentha canadensis	Lamiaceae	Cultivated	Herb
Perilla frutescens	Lamiaceae	Cultivated	Herb
Clerodendrum thomsoniae	Lamiaceae	Cultivated	Shrub
Mazus pumilus	Phrymaceae	Spontaneously growing	Herb
Asystasia gangetica	Acanthaceae	Spontaneously growing	Herb
Dicliptera chinensis	Acanthaceae	Spontaneously growing	Herb
Justicia gendarussa	Acanthaceae	Cultivated	Herb
Ruellia elegans	Acanthaceae	Cultivated	Herb
Ruellia simplex	Acanthaceae	Cultivated	Herb
Sanchezia oblonga	Acanthaceae	Cultivated	Shrub
Tabebuia aurea	Bignoniaceae	Cultivated	Tree
Handroanthus impetiginosus	Bignoniaceae	Cultivated	Tree
Pyrostegia venusta	Bignoniaceae	Cultivated	Shrub
Spathodea campanulata	Bignoniaceae	Cultivated	Tree
Kigelia africana	Bignoniaceae	Cultivated	Tree
Radermachera sinica	Bignoniaceae	Cultivated	Tree
Handroanthus chrysanthus	Bignoniaceae	Cultivated	Tree
Jacaranda mimosifolia	Bignoniaceae	Cultivated	Tree
Markhamia stipulata	Bignoniaceae	Cultivated	Tree
Mayodendron igneum	Bignoniaceae	Cultivated	Tree
Verbena officinalis	Verbenaceae	Spontaneously growing	Herb
Phyla nodiflora	Verbenaceae	Spontaneously growing	Herb
Stachytarpheta jamaicensis	Verbenaceae	Spontaneously growing	Herb
Duranta erecta	Verbenaceae	Cultivated	Shrub
Lantana camara	Verbenaceae	Cultivated or Spontaneously growing	Shrub, Herb
Helwingia japonica	Helwingiaceae	Cultivated	Shrub
Ilex asprella	Aquifoliaceae	Spontaneously growing	Shrub
Ilex cornuta	Aquifoliaceae	Cultivated	Shrub
Ilex rotunda	Aquifoliaceae	Cultivated	Tree, Shrub
Erigeron acer	Asteraceae	Spontaneously growing	Herb
Parthenium hysterophorus	Asteraceae	Spontaneously growing	Herb
Praxelis clematidea	Asteraceae	Spontaneously growing	Herb
Soliva anthemifolia	Asteraceae	Spontaneously growing	Herb
Tridax procumbens	Asteraceae	Spontaneously growing	Herb
Lactuca sativa	Asteraceae	Cultivated or Spontaneously growing	Herb
Ageratum conyzoides	Asteraceae	Spontaneously growing	Herb
Artemisia lactiflora	Asteraceae	Spontaneously growing	Herb
Aster subulatus	Asteraceae	Spontaneously growing	Herb
Bidens pilosa	Asteraceae	Spontaneously growing	Herb
Blumea axillaris	Asteraceae	Spontaneously growing	Herb
Centipeda minima	Asteraceae	Spontaneously growing	Herb
Chromolaena odorata	Asteraceae	Spontaneously growing	Shrub, Herb
Cyanthillium cinereum	Asteraceae	Spontaneously growing	Herb
Elephantopus tomentosus	Asteraceae	Spontaneously growing	Herb
Erigeron bonariensis	Asteraceae	Spontaneously growing	Shrub
Erigeron canadensis	Asteraceae	Spontaneously growing	Herb
Erigeron sumatrensis	Asteraceae	Spontaneously growing	Herb
Gnaphalium polycaulon	Asteraceae	Spontaneously growing	Herb
Mikania micrantha	Asteraceae	Spontaneously growing	Herb
Sigesbeckia pubescens	Asteraceae	Spontaneously growing	Herb
Synedrella nodiflora	Asteraceae	Spontaneously growing	Herb
Xanthium strumarium	Asteraceae	Spontaneously growing	Herb
Artemisia indica	Asteraceae	Spontaneously growing	Herb
Crassocephalum crepidioides	Asteraceae	Spontaneously growing	Herb
Eclipta prostrata	Asteraceae	Spontaneously growing	Herb
Elephantopus scaber	Asteraceae	Spontaneously growing	Herb
Emilia sonchifolia	Asteraceae	Spontaneously growing	Herb
Galinsoga parviflora	Asteraceae	Spontaneously growing	Herb
Youngia japonica	Asteraceae	Spontaneously growing	Herb
Sphagneticola trilobata	Asteraceae	Cultivated or Spontaneously growing	Herb
Sphagneticola calendulacea	Asteraceae	Spontaneously growing	Herb
Vernonia amygdalina	Asteraceae	Cultivated	Herb
Pittosporum tobira	Pittosporaceae	Cultivated	Tree, Shrub
Polyscias scutellaria	Araliaceae	Cultivated	Shrub
Fatsia japonica	Araliaceae	Cultivated	Herb
Polyscias fruticosa	Araliaceae	Cultivated	Shrub
Schefflera actinophylla	Araliaceae	Cultivated	Tree, Shrub
Schefflera heptaphylla	Araliaceae	Cultivated or Spontaneously growing	Tree, Shrub
Heteropanax fragrans	Araliaceae	Cultivated	Tree
Hydrocotyle sibthorpioides	Araliaceae	Spontaneously growing	Herb
Schefflera arboricola	Araliaceae	Cultivated	Tree, Shrub, Herb
Centella asiatica	Apiaceae	Spontaneously growing	Herb
Eryngium foetidum	Apiaceae	Spontaneously growing	Herb

## Sheet: Haikou
Plant list in the build-up area of Haikou recorded in investigation
Latin name	Family name	Cultivated or Spontaneously growing	Life form
Lygodium japonicum	Lygodiaceae	Cultivated	Shrub, Herb
Lygodium microphyllum	Lygodiaceae	Cultivated or Spontaneously growing	Herb
Pteris semipinnata	Pteridaceae	Spontaneously growing	Herb
Pteris cretica	Pteridaceae	Cultivated	Herb
Nephrolepis cordifolia	Nephrolepidaceae	Cultivated	Herb
Pyrrosia piloselloides	Polypodiaceae	Spontaneously growing	Herb
Platycerium wallichii	Polypodiaceae	Cultivated	Herb
Pyrrosia lingua	Polypodiaceae	Spontaneously growing	Herb
Zamia furfuracea	Cycadaceae	Cultivated	Shrub
Cycas taiwaniana	Cycadaceae	Cultivated	Shrub
Cycas revoluta	Cycadaceae	Cultivated	Shrub
Zamia pumila	Cycadaceae	Cultivated	Shrub
Araucaria cunninghamii	Araucariaceae	Cultivated	Tree
Cupressus funebris	Cupressaceae	Cultivated	Tree
Platycladus orientalis	Cupressaceae	Cultivated	Tree
Juniperus chinensis	Cupressaceae	Cultivated	Tree, Shrub
Podocarpus macrophyllus	Podocarpaceae	Cultivated	Tree
Nageia nagi	Podocarpaceae	Cultivated	Tree
Piper sarmentosum	Piperaceae	Cultivated	Herb
Michelia alba	Magnoliaceae	Cultivated	Tree
Yulania × soulangeana	Magnoliaceae	Cultivated	Tree
Michelia figo	Magnoliaceae	Cultivated	Tree
Michelia sphaerantha	Magnoliaceae	Cultivated	Tree
Annona muricata	Annonaceae	Cultivated	Tree
Annona squamosa	Annonaceae	Cultivated	Tree
Cananga odorata	Annonaceae	Cultivated	Tree
Litsea glutinosa	Lauraceae	Spontaneously growing	Tree, Shrub
Cinnamomum kotoense	Lauraceae	Cultivated	Shrub
Machilus salicina	Lauraceae	Cultivated	Tree
Cinnamomum cassia	Lauraceae	Cultivated	Tree
Cinnamomum camphora	Lauraceae	Cultivated	Tree
Thaumatophyllum spruceanum	Araceae	Cultivated or Spontaneously growing	Herb
Pistia stratiotes	Araceae	Spontaneously growing	Herb
Monstera deliciosa	Araceae	Cultivated	Herb
Alocasia odora	Araceae	Cultivated	Herb
Syngonium podophyllum	Araceae	Cultivated	Herb
Epipremnum aureum	Araceae	Cultivated	Herb
Epipremnum pinnatum	Araceae	Cultivated	Herb
Philodendron imbe	Araceae	Cultivated	Herb
Colocasia esculenta	Araceae	Cultivated	Herb
Pandanus pygmaeus	Pandanaceae	Cultivated	Shrub, Herb
Pandanus tectorius	Pandanaceae	Cultivated	Tree, Shrub
Pandanus utilis	Pandanaceae	Cultivated	Tree, Shrub
Phormium tenax	Liliaceae	Cultivated	Shrub
Dianella caerulea	Liliaceae	Cultivated	Herb
Cephalantheropsis obcordata	Orchidaceae	Cultivated	Tree
Hemerocallis citrina	Xanthorrhoeaceae	Cultivated	Herb
Allium fistulosum	Amaryllidaceae	Cultivated	Herb
Hymenocallis littoralis	Amaryllidaceae	Cultivated	Herb
Crinum asiaticum	Amaryllidaceae	Cultivated	Shrub, Herb
Hippeastrum striatum	Amaryllidaceae	Cultivated	Herb
Dracaena reflexa	Asparagaceae	Cultivated	Tree, Shrub
Yucca gloriosa	Asparagaceae	Cultivated	Shrub
Sansevieria trifasciata	Asparagaceae	Cultivated	Herb
Reineckea carnea	Asparagaceae	Cultivated	Herb
Ophiopogon intermedius	Asparagaceae	Cultivated or Spontaneously growing	Herb
Agave americana	Asparagaceae	Cultivated	Herb
Dracaena draco	Asparagaceae	Cultivated	Tree, Shrub
Ophiopogon japonicus	Asparagaceae	Cultivated	Herb
Dracaena marginata	Asparagaceae	Cultivated	Shrub
Yucca flaccida	Asparagaceae	Cultivated	Shrub, Herb
Liriope spicata	Asparagaceae	Cultivated	Herb
Asparagus cochinchinensis	Asparagaceae	Cultivated	Herb
Rohdea japonica	Asparagaceae	Cultivated	Herb
Dracaena fragrans	Asparagaceae	Cultivated	Shrub, Herb
Yucca gigantea	Asparagaceae	Cultivated	Shrub
Cordyline fruticosa	Asparagaceae	Cultivated	Shrub, Herb
Agave sisalana	Asparagaceae	Cultivated	Shrub, Herb
Rhapis humilis	Arecaceae	Cultivated	Shrub
Bismarckia nobilis	Arecaceae	Cultivated	Tree
Areca catechu	Arecaceae	Cultivated	Tree
Butia capitata	Arecaceae	Cultivated	Tree
Phoenix loureiroi	Arecaceae	Cultivated	Tree
Roystonea regia	Arecaceae	Cultivated	Tree
Caryota mitis	Arecaceae	Cultivated	Tree, Shrub
Wodyetia bifurcata	Arecaceae	Cultivated	Tree, Shrub
Phoenix canariensis	Arecaceae	Cultivated	Tree, Shrub
Pritchardia pacifica	Arecaceae	Cultivated	Tree
Hyophorbe lagenicaulis	Arecaceae	Cultivated	Tree
Coccothrinax crinita	Arecaceae	Cultivated	Tree
Phoenix sylvestris	Arecaceae	Cultivated	Tree
Livistona chinensis	Arecaceae	Cultivated	Tree, Shrub
Dypsis decaryi	Arecaceae	Cultivated	Tree
Dypsis lutescens	Arecaceae	Cultivated	Tree, Shrub
Washingtonia filifera	Arecaceae	Cultivated	Tree
Cocos nucifera	Arecaceae	Cultivated	Tree
Elaeis guineensis	Arecaceae	Cultivated	Tree
Caryota maxima	Arecaceae	Cultivated	Tree, Shrub
Licuala grandis	Arecaceae	Cultivated	Shrub
Trachycarpus fortunei	Arecaceae	Cultivated	Tree
Rhapis excelsa	Arecaceae	Cultivated	Shrub
Commelina benghalensis	Commelinaceae	Spontaneously growing	Herb
Commelina communis	Commelinaceae	Spontaneously growing	Herb
Tradescantia spathacea	Commelinaceae	Cultivated	Herb
Tradescantia pallida	Commelinaceae	Cultivated	Herb
Strelitzia reginae	Strelitziaceae	Cultivated	Herb
Ravenala madagascariensis	Strelitziaceae	Cultivated	Tree, Shrub
Heliconia subulata	Heliconiaceae	Cultivated	Herb
Heliconia metallica	Heliconiaceae	Cultivated	Herb
Musa basjoo	Musaceae	Cultivated	Herb
Musa balbisiana	Musaceae	Cultivated or Spontaneously growing	Herb
Canna indica	Cannaceae	Cultivated	Herb
Maranta arundinacea	Marantaceae	Cultivated	Herb
Stromanthe thalia	Marantaceae	Cultivated	Herb
Alpinia zerumbet	Zingiberaceae	Cultivated	Herb
Cyperus involucratus	Cyperaceae	Cultivated	Herb
Kyllinga polyphylla	Cyperaceae	Spontaneously growing	Herb
Cyperus rotundus	Cyperaceae	Spontaneously growing	Herb
Imperata cylindrica	Poaceae	Spontaneously growing	Herb
Echinochloa crus-galli	Poaceae	Spontaneously growing	Herb
Saccharum arundinaceum	Poaceae	Cultivated or Spontaneously growing	Herb
Axonopus compressus	Poaceae	Cultivated or Spontaneously growing	Herb
Bambusa ventricosa	Poaceae	Cultivated	Herb
Zoysia matrella	Poaceae	Cultivated or Spontaneously growing	Herb
Cynodon dactylon	Poaceae	Cultivated or Spontaneously growing	Herb
Phyllostachys reticulata	Poaceae	Cultivated	Herb
Melinis repens	Poaceae	Spontaneously growing	Herb
Digitaria radicosa	Poaceae	Spontaneously growing	Herb
Zoysia japonica	Poaceae	Cultivated or Spontaneously growing	Herb
Paspalum conjugatum	Poaceae	Spontaneously growing	Herb
Dactyloctenium aegyptium	Poaceae	Spontaneously growing	Herb
Digitaria sanguinalis	Poaceae	Spontaneously growing	Herb
Chloris barbata	Poaceae	Spontaneously growing	Herb
Eleusine indica	Poaceae	Spontaneously growing	Herb
Panicum repens	Poaceae	Spontaneously growing	Herb
Bambusa textilis	Poaceae	Cultivated or Spontaneously growing	Herb
Eremochloa ciliaris	Poaceae	Spontaneously growing	Herb
Zoysia pacifica	Poaceae	Cultivated or Spontaneously growing	Herb
Bambusa multiplex	Poaceae	Cultivated or Spontaneously growing	Herb
Chrysopogon aciculatus	Poaceae	Cultivated	Herb
Oplismenus compositus	Poaceae	Cultivated	Herb
Stephania longa	Menispermaceae	Spontaneously growing	Herb
Mahonia fortunei	Berberidaceae	Cultivated	Shrub
Buxus bodinieri	Buxaceae	Cultivated	Shrub
Buxus sinica	Buxaceae	Cultivated	Shrub
Liquidambar formosana	Altingiaceae	Cultivated	Tree
Loropetalum chinense	Hamamelidaceae	Cultivated	Shrub
Tetrastigma obtectum	Vitaceae	Spontaneously growing	Shrub
Acacia confusa	Fabaceae	Cultivated	Tree
Mimosa invisa	Fabaceae	Spontaneously growing	Shrub, Herb
Robinia pseudoacacia	Fabaceae	Cultivated	Tree, Shrub
Erythrina variegata	Fabaceae	Cultivated	Tree
Zornia gibbosa	Fabaceae	Spontaneously growing	Herb
Peltophorum pterocarpum	Fabaceae	Cultivated	Tree
Delonix regia	Fabaceae	Cultivated	Tree
Canavalia rosea	Fabaceae	Spontaneously growing	Herb
Mimosa pudica	Fabaceae	Spontaneously growing	Herb
Bauhinia blakeana	Fabaceae	Cultivated	Tree
Ormosia henryi	Fabaceae	Cultivated	Tree
Senna surattensis	Fabaceae	Cultivated	Tree, Shrub
Erythrina crista-galli	Fabaceae	Cultivated	Tree
Grona heterocarpos	Fabaceae	Spontaneously growing	Herb
Dalbergia odorifera	Fabaceae	Cultivated	Tree
Alysicarpus vaginalis	Fabaceae	Spontaneously growing	Herb
Styphnolobium japonicum	Fabaceae	Cultivated	Tree
Acacia mangium	Fabaceae	Cultivated	Tree
Arachis duranensis	Fabaceae	Cultivated or Spontaneously growing	Herb
Medicago sativa	Fabaceae	Spontaneously growing	Herb
Desmodium triflorum	Fabaceae	Spontaneously growing	Herb
Tamarindus indica	Fabaceae	Cultivated	Tree
Sesbania cannabina	Fabaceae	Spontaneously growing	Herb
Senna siamea	Fabaceae	Cultivated	Tree
Bauhinia purpurea	Fabaceae	Cultivated	Tree, Shrub
Caesalpinia pulcherrima	Fabaceae	Cultivated	Shrub
Leucaena leucocephala	Fabaceae	Cultivated	Tree, Shrub
Samanea saman	Fabaceae	Cultivated	Tree
Calliandra haematocephala	Fabaceae	Cultivated	Shrub
Macroptilium atropurpureum	Fabaceae	Spontaneously growing	Herb
Laurocerasus zippeliana	Rosaceae	Cultivated	Tree
Eriobotrya japonica	Rosaceae	Cultivated	Tree
Photinia serratifolia	Rosaceae	Cultivated	Shrub
Amygdalus persica	Rosaceae	Cultivated	Tree
Paliurus hemsleyanus	Rhamnaceae	Cultivated	Tree
Ficus subpisocarpa	Moraceae	Cultivated	Tree
Artocarpus heterophyllus	Moraceae	Cultivated	Tree
Ficus benjamina	Moraceae	Cultivated	Tree, Shrub
Ficus hispida	Moraceae	Spontaneously growing	Tree, Shrub
Ficus altissima	Moraceae	Cultivated	Tree
Ficus virens	Moraceae	Cultivated	Tree
Artocarpus altilis	Moraceae	Cultivated	Tree
Ficus religiosa	Moraceae	Cultivated	Tree
Streblus asper	Moraceae	Cultivated or Spontaneously growing	Tree, Shrub
Ficus microcarpa	Moraceae	Cultivated or Spontaneously growing	Tree, Shrub
Ficus deltoidea	Moraceae	Cultivated	Shrub
Ficus maclellandii	Moraceae	Cultivated	Tree, Shrub
Ficus concinna	Moraceae	Cultivated	Tree
Ficus elastica	Moraceae	Cultivated	Tree
Urtica triangularis	Urticaceae	Spontaneously growing	Herb
Pouzolzia zeylanica	Urticaceae	Spontaneously growing	Herb
Pilea microphylla	Urticaceae	Spontaneously growing	Herb
Urtica fissa	Urticaceae	Spontaneously growing	Herb
Castanea mollissima	Fagaceae	Cultivated	Tree
Pterocarpus indicus	Fagaceae	Cultivated	Tree
Casuarina equisetifolia	Casuarinaceae	Cultivated	Tree, Shrub
Diplocyclos palmatus	Cucurbitaceae	Spontaneously growing	Herb
Zehneria japonica	Cucurbitaceae	Spontaneously growing	Herb
Begonia cucullata	Begoniaceae	Cultivated	Herb
Oxalis articulata	Oxalidaceae	Cultivated	Herb
Oxalis debilis	Oxalidaceae	Cultivated	Herb
Oxalis pes-caprae	Oxalidaceae	Cultivated	Herb
Oxalis corniculata	Oxalidaceae	Cultivated or Spontaneously growing	Herb
Elaeocarpus hainanensis	Elaeocarpaceae	Cultivated	Tree
Carallia brachiata	Rhizophoraceae	Spontaneously growing	Tree
Ricinus communis	Euphorbiaceae	Spontaneously growing	Herb
Codiaeum variegatum	Euphorbiaceae	Cultivated	Tree, Shrub
Euphorbia humifusa	Euphorbiaceae	Spontaneously growing	Herb
Euphorbia hirta	Euphorbiaceae	Spontaneously growing	Herb
Excoecaria cochinchinensis	Euphorbiaceae	Cultivated	Shrub
Euphorbia tithymaloides	Euphorbiaceae	Cultivated	Shrub
Acalypha wilkesiana	Euphorbiaceae	Cultivated	Shrub
Trevia nudiflora	Euphorbiaceae	Cultivated	Tree
Endospermum chinense	Euphorbiaceae	Cultivated	Tree
Euphorbia thymifolia	Euphorbiaceae	Spontaneously growing	Herb
Jatropha integerrima	Euphorbiaceae	Cultivated	Tree, Shrub
Aleurites moluccanus	Euphorbiaceae	Cultivated	Tree
Acalypha australis	Euphorbiaceae	Spontaneously growing	Herb
Triadica sebifera	Euphorbiaceae	Cultivated	Shrub
Phyllanthus myrtifolius	Phyllanthaceae	Cultivated	Shrub
Phyllanthus reticulatus	Phyllanthaceae	Cultivated	Shrub
Bischofia javanica	Phyllanthaceae	Cultivated	Tree, Shrub, Herb
Antidesma bunius	Phyllanthaceae	Cultivated	Tree, Shrub
Phyllanthus urinaria	Phyllanthaceae	Spontaneously growing	Herb
Bischofia polycarpa	Phyllanthaceae	Cultivated	Tree
Phyllanthus niruri	Phyllanthaceae	Spontaneously growing	Herb
Passiflora foetida	Passifloraceae	Spontaneously growing	Herb
Salix babylonica	Salicaceae	Cultivated	Tree
Garcinia spicata	Clusiaceae	Cultivated	Tree
Terminalia catappa	Combretaceae	Cultivated	Tree, Shrub
Terminalia neotaliala	Combretaceae	Cultivated	Tree
Lagerstroemia speciosa	Lythraceae	Cultivated	Tree
Sonneratia caseolaris	Lythraceae	Cultivated	Tree
Cuphea hyssopifolia	Lythraceae	Cultivated	Shrub
Lagerstroemia parviflora	Lythraceae	Cultivated	Tree
Lagerstroemia indica	Lythraceae	Cultivated	Shrub
Circaea cordata	Onagraceae	Spontaneously growing	Herb
Psidium guajava	Myrtaceae	Cultivated	Shrub
Callistemon rigidus	Myrtaceae	Cultivated	Tree
Syzygium rehderianum	Myrtaceae	Cultivated	Shrub
Melaleuca bracteata	Myrtaceae	Cultivated	Tree
Xanthostemon chrysanthus	Myrtaceae	Cultivated	Tree, Shrub
Syzygium jambos	Myrtaceae	Cultivated or Spontaneously growing	Tree
Syzygium cumini	Myrtaceae	Cultivated	Tree
Syzygium samarangense	Myrtaceae	Cultivated	Tree
Tibouchina semidecandra	Melastomataceae	Cultivated	Shrub
Mangifera indica	Anacardiaceae	Cultivated	Tree
Dracontomelon duperreanum	Anacardiaceae	Cultivated	Tree
Litchi chinensis	Sapindaceae	Cultivated	Tree
Dimocarpus longan	Sapindaceae	Cultivated	Tree, Shrub
Clausena lansium	Rutaceae	Spontaneously growing	Tree
Citrus japonica	Rutaceae	Cultivated	Shrub
Murraya paniculata	Rutaceae	Cultivated	Shrub
Zanthoxylum nitidum	Rutaceae	Spontaneously growing	Shrub
Zanthoxylum beecheyanum	Rutaceae	Cultivated	Shrub
Citrus maxima	Rutaceae	Cultivated or Spontaneously growing	Tree
Khaya senegalensis	Meliaceae	Cultivated	Tree
Melia azedarach	Meliaceae	Cultivated	Tree, Shrub
Aglaia odorata	Meliaceae	Cultivated	Shrub
Pterygota alata	Malvaceae	Cultivated	Tree
Pachira glabra	Malvaceae	Cultivated	Tree
Sida acuta	Malvaceae	Spontaneously growing	Herb
Hibiscus tiliaceus	Malvaceae	Cultivated	Tree
Ceiba pentandra	Malvaceae	Cultivated	Tree
Sterculia lanceolata	Malvaceae	Cultivated	Tree
Theobroma cacao	Malvaceae	Cultivated	Tree
Ceiba speciosa	Malvaceae	Cultivated	Tree
Bombax ceiba	Malvaceae	Cultivated	Tree
Sterculia monosperma	Malvaceae	Cultivated	Tree
Malvastrum coromandelianum	Malvaceae	Spontaneously growing	Herb
Hibiscus rosa-sinensis	Malvaceae	Cultivated	Shrub
Carica papaya	Caricaceae	Cultivated or Spontaneously growing	Tree
Cleome rutidosperma	Cleomaceae	Spontaneously growing	Herb
Brassica rapa	Brassicaceae	Cultivated	Herb
Persicaria chinensis	Polygonaceae	Spontaneously growing	Herb
Stellaria media	Caryophyllaceae	Spontaneously growing	Herb
Drymaria cordata	Caryophyllaceae	Spontaneously growing	Herb
Alternanthera brasiliana	Amaranthaceae	Spontaneously growing	Herb
Cyathula prostrata	Amaranthaceae	Spontaneously growing	Herb
Celosia cristata	Amaranthaceae	Cultivated	Shrub
Alternanthera philoxeroides	Amaranthaceae	Spontaneously growing	Herb
Achyranthes bidentata	Amaranthaceae	Spontaneously growing	Herb
Achyranthes aspera	Amaranthaceae	Spontaneously growing	Herb
Amaranthus tricolor	Amaranthaceae	Spontaneously growing	Herb
Gomphrena celosioides	Amaranthaceae	Spontaneously growing	Herb
Boerhavia diffusa	Nyctaginaceae	Spontaneously growing	Herb
Bougainvillea spectabilis	Nyctaginaceae	Cultivated	Tree, Shrub
Mirabilis jalapa	Nyctaginaceae	Cultivated	Herb
Mollugo stricta	Molluginaceae	Spontaneously growing	Herb
Basella alba	Basellaceae	Spontaneously growing	Tree
Portulaca oleracea	Portulacaceae	Cultivated or Spontaneously growing	Herb
Hylocereus undatus	Cactaceae	Cultivated	Herb
Barringtonia asiatica	Lecythidaceae	Cultivated	Tree
Manilkara zapota	Sapotaceae	Cultivated	Tree, Shrub
Synsepalum dulcificum	Sapotaceae	Cultivated	Shrub
Mimusops elengi	Sapotaceae	Cultivated	Tree
Diospyros strigosa	Ebenaceae	Cultivated	Tree
Primula malacoides	Primulaceae	Cultivated	Herb
Camellia japonica	Theaceae	Cultivated	Shrub
Aucuba japonica	Garryaceae	Cultivated	Shrub
Oldenlandia diffusa	Rubiaceae	Spontaneously growing	Herb
Mussaenda philippica	Rubiaceae	Cultivated	Shrub
Spermacoce verticillata	Rubiaceae	Spontaneously growing	Herb
Spermacoce remota	Rubiaceae	Spontaneously growing	Herb
Ixora hainanensis	Rubiaceae	Cultivated	Shrub
Ixora coccinea	Rubiaceae	Cultivated	Shrub
Paederia foetida	Rubiaceae	Spontaneously growing	Herb
Morinda parvifolia	Rubiaceae	Spontaneously growing	Herb
Galium spurium	Rubiaceae	Spontaneously growing	Herb
Ixora chinensis	Rubiaceae	Cultivated	Shrub
Richardia scabra	Rubiaceae	Spontaneously growing	Herb
Hamelia patens	Rubiaceae	Cultivated	Shrub
Gardenia jasminoides	Rubiaceae	Cultivated	Shrub
Fagraea ceilanica	Gentianaceae	Cultivated	Shrub
Allamanda schottii	Apocynaceae	Cultivated	Shrub
Thevetia peruviana	Apocynaceae	Cultivated	Tree, Shrub
Plumeria rubra	Apocynaceae	Cultivated	Tree, Shrub
Nerium oleander	Apocynaceae	Cultivated	Tree
Allamanda cathartica	Apocynaceae	Cultivated	Shrub
Hoya angustifolia	Apocynaceae	Cultivated	Herb
Alstonia scholaris	Apocynaceae	Cultivated	Tree, Shrub
Hevea brasiliensis	Apocynaceae	Cultivated	Tree
Catharanthus roseus	Apocynaceae	Cultivated or Spontaneously growing	Shrub, Herb
Carmona microphylla	Boraginaceae	Cultivated	Shrub
Ipomoea batatas	Convolvulaceae	Cultivated or Spontaneously growing	Herb
Ipomoea pes-caprae	Convolvulaceae	Cultivated or Spontaneously growing	Herb
Ipomoea nil	Convolvulaceae	Spontaneously growing	Herb
Cuscuta chinensis	Convolvulaceae	Spontaneously growing	Herb
Ipomoea cairica	Convolvulaceae	Spontaneously growing	Herb
Petunia × atkinsiana	Solanaceae	Cultivated	Herb
Solanum nigrum	Solanaceae	Spontaneously growing	Herb
Solanum americanum	Solanaceae	Spontaneously growing	Herb
Ligustrum × vicaryi	Oleaceae	Cultivated	Shrub
Chionanthus retusus	Oleaceae	Cultivated	Tree
Jasminum sambac	Oleaceae	Cultivated	Shrub
Osmanthus fragrans	Oleaceae	Cultivated	Shrub
Ligustrum lucidum	Oleaceae	Cultivated	Tree
Ligustrum sinense	Oleaceae	Cultivated	Shrub
Ligustrum quihoui	Oleaceae	Cultivated	Shrub
Jasminum mesnyi	Oleaceae	Cultivated or Spontaneously growing	Shrub
Buddleja asiatica	Scrophulariaceae	Cultivated or Spontaneously growing	Shrub
Torenia fournieri	Linderniaceae	Cultivated	Herb
Clerodendrum cyrtophyllum	Lamiaceae	Spontaneously growing	Herb
Mentha spicata	Lamiaceae	Cultivated or Spontaneously growing	Herb
Coleus scutellarioides	Lamiaceae	Cultivated	Herb
Mazus pumilus	Phrymaceae	Spontaneously growing	Herb
Ruellia simplex	Acanthaceae	Cultivated	Shrub
Sanchezia oblonga	Acanthaceae	Cultivated	Shrub
Pachystachys lutea	Acanthaceae	Cultivated	Herb
Pseuderanthemum carruthersii	Acanthaceae	Cultivated	Shrub
Cyrtanthera carnea	Acanthaceae	Cultivated	Herb
Kigelia africana	Bignoniaceae	Cultivated	Tree
Radermachera hainanensis	Bignoniaceae	Cultivated	Tree
Crescentia cujete	Bignoniaceae	Cultivated	Tree
Handroanthus chrysanthus	Bignoniaceae	Cultivated	Tree
Spathodea campanulata	Bignoniaceae	Cultivated	Tree
Jacaranda mimosifolia	Bignoniaceae	Cultivated	Tree
Duranta erecta	Verbenaceae	Cultivated	Shrub
Verbena officinalis	Verbenaceae	Spontaneously growing	Herb
Lantana camara	Verbenaceae	Cultivated or Spontaneously growing	Shrub, Herb
Ilex crenata	Aquifoliaceae	Cultivated	Shrub
Lobelia nummularia	Campanulaceae	Spontaneously growing	Herb
Scaevola taccada	Goodeniaceae	Cultivated	Shrub
Elephantopus scaber	Asteraceae	Spontaneously growing	Herb
Chromolaena odorata	Asteraceae	Spontaneously growing	Herb
Erigeron acer	Asteraceae	Spontaneously growing	Herb
Bidens pilosa	Asteraceae	Spontaneously growing	Herb
Chrysanthemum morifolium	Asteraceae	Cultivated or Spontaneously growing	Herb
Youngia japonica	Asteraceae	Spontaneously growing	Herb
Ageratum conyzoides	Asteraceae	Spontaneously growing	Herb
Cirsium japonicum	Asteraceae	Spontaneously growing	Herb
Praxelis clematidea	Asteraceae	Spontaneously growing	Herb
Sonchus oleraceus	Asteraceae	Spontaneously growing	Herb
Eclipta prostrata	Asteraceae	Spontaneously growing	Herb
Sphagneticola trilobata	Asteraceae	Cultivated or Spontaneously growing	Herb
Hemisteptia lyrata	Asteraceae	Spontaneously growing	Herb
Sphagneticola calendulacea	Asteraceae	Spontaneously growing	Herb
Taraxacum mongolicum	Asteraceae	Spontaneously growing	Herb
Blumea axillaris	Asteraceae	Spontaneously growing	Herb
Mikania micrantha	Asteraceae	Spontaneously growing	Herb
Cirsium belingschanicum	Asteraceae	Spontaneously growing	Herb
Erigeron canadensis	Asteraceae	Spontaneously growing	Herb
Chrysanthemum indicum	Asteraceae	Spontaneously growing	Herb
Cyanthillium cinereum	Asteraceae	Spontaneously growing	Herb
Emilia sonchifolia	Asteraceae	Spontaneously growing	Herb
Parthenium hysterophorus	Asteraceae	Spontaneously growing	Herb
Sonchus brachyotus	Asteraceae	Spontaneously growing	Herb
Aster subulatus	Asteraceae	Spontaneously growing	Herb
Sambucus javanica	Adoxaceae	Spontaneously growing	Shrub, Herb
Pittosporum tobira	Pittosporaceae	Cultivated	Tree, Shrub
Heptapleurum heptaphyllum	Araliaceae	Cultivated	Shrub
Schefflera arboricola	Araliaceae	Cultivated	Shrub
Heptapleurum actinophyllum	Araliaceae	Cultivated	Tree
Heteropanax fragrans	Araliaceae	Cultivated	Tree, Shrub
Polyscias fruticosa	Araliaceae	Cultivated	Shrub
Hydrocotyle sibthorpioides	Araliaceae	Spontaneously growing	Herb
Polyscias scutellaria	Araliaceae	Cultivated	Shrub
Centella asiatica	Apiaceae	Spontaneously growing	Herb
Daucus carota	Apiaceae	Spontaneously growing	Herb

## Sheet: Danzhou
Plant list in the build-up area of Danzhou recorded in investigation
Latin name	Family name	Cultivated or Spontaneously growing	Life form
Lygodium japonicum	Lygodiaceae	Spontaneously growing	Herb
Lygodium microphyllum	Lygodiaceae	Spontaneously growing	Herb
Eremochloa ciliaris	Pteridaceae	Spontaneously growing	Herb
Paragymnopteris delavayi	Pteridaceae	Spontaneously growing	Herb
Adiantum pedatum	Pteridaceae	Spontaneously growing	Herb
Pteris arisanensis	Pteridaceae	Cultivated	Herb
Pteris ensiformis	Pteridaceae	Spontaneously growing	Herb
Pteris semipinnata	Pteridaceae	Spontaneously growing	Herb
Nephrolepis auriculata	Nephrolepidaceae	Cultivated	Herb
Nephrolepis exaltata	Nephrolepidaceae	Cultivated	Herb
Pyrrosia adnascens	Polypodiaceae	Spontaneously growing	Herb
Lemmaphyllum microphyllum	Polypodiaceae	Spontaneously growing	Herb
Cycas revoluta	Cycadaceae	Cultivated	Shrub
Cycas panzhihuaensis	Cycadaceae	Cultivated	Shrub
Cycas taiwaniana	Cycadaceae	Cultivated	Shrub
Araucaria cunninghamii	Araucariaceae	Cultivated	Tree
Araucaria heterophylla	Araucariaceae	Cultivated	Tree
Podocarpus chinensis	Podocarpaceae	Cultivated	Shrub
Podocarpus macrophyllus	Podocarpaceae	Cultivated	Shrub
Piper kadsura	Piperaceae	Cultivated	Herb
Piper sarmentosum	Piperaceae	Cultivated	Herb
Michelia alba	Magnoliaceae	Cultivated	Tree
Magnolia henryi	Magnoliaceae	Cultivated	Tree
Michelia maudiae	Magnoliaceae	Cultivated	Tree
Magnolia championii	Magnoliaceae	Cultivated	Tree
Parakmeria lotungensis	Magnoliaceae	Cultivated	Tree
Yulania liliiflora	Magnoliaceae	Cultivated	Tree
Michelia figo	Magnoliaceae	Cultivated	Tree
Annona muricata	Annonaceae	Cultivated	Tree
Annona squamosa	Annonaceae	Cultivated	Shrub
Desmos chinensis	Annonaceae	Spontaneously growing	Shrub
Persea americana	Lauraceae	Spontaneously growing	Tree
Cinnamomum camphora	Lauraceae	Cultivated	Tree
Phoebe zhennan	Lauraceae	Spontaneously growing	Tree
Cinnamomum japonicum	Lauraceae	Spontaneously growing	Tree
Litsea glutinosa	Lauraceae	Spontaneously growing	Tree, Shrub
Cinnamomum burmanni	Lauraceae	Cultivated	Tree
Cinnamomum kotoense	Lauraceae	Cultivated	Shrub
Machilus nanmu	Lauraceae	Spontaneously growing	Tree
Cinnamomum bodinieri	Lauraceae	Spontaneously growing	Tree
Colocasia gigantea	Araceae	Cultivated	Herb
Colocasia antiquorum	Araceae	Cultivated	Herb
Dieffenbachia seguine	Araceae	Cultivated	Herb
Epipremnum aureum	Araceae	Cultivated	Herb
Syngonium podophyllum	Araceae	Cultivated	Herb
Epipremnum pinnatum	Araceae	Cultivated	Herb
Alocasia odora	Araceae	Cultivated	Herb
Colocasia esculenta	Araceae	Cultivated	Herb
Thaumatophyllum bipinnatifidum	Araceae	Cultivated	Herb
Monstera deliciosa	Araceae	Cultivated	Herb
Philodendron erubescens	Araceae	Cultivated	Herb
Zamioculcas zamiifolia	Araceae	Cultivated	Herb
Pandanus tectorius	Pandanaceae	Cultivated	Shrub
Pandanus utilis	Pandanaceae	Cultivated	Tree, Shrub
Notholirion bulbuliferum	Liliaceae	Cultivated	Shrub
Gasteraloe beguinii	Liliaceae	Cultivated	Shrub
Aloe vera	Liliaceae	Cultivated	Shrub
Hemerocallis citrina	Liliaceae	Cultivated	Herb
Aloe vera	Liliaceae	Cultivated	Herb
Dracaena reflexa	Liliaceae	Cultivated	Shrub
Dianellaensifolia	Liliaceae	Cultivated	Shrub
Dracaena cochinchinensis	Liliaceae	Cultivated	Shrub
Aloe arborescens	Liliaceae	Cultivated	Shrub
Albuca bracteata	Liliaceae	Cultivated	Shrub
Sansevieria trifasciata	Liliaceae	Cultivated	Shrub, Herb
Asparagus densiflorus	Liliaceae	Cultivated	Shrub
Dracaena cambodiana	Liliaceae	Cultivated	Tree, Shrub
Asparagus oligoclonos	Liliaceae	Cultivated	Shrub
Dracaenafragrans	Liliaceae	Cultivated	Shrub
Hemerocallis fulva	Liliaceae	Cultivated	Shrub
Liparis viridiflora	Orchidaceae	Cultivated	Tree
Platanthera minor	Orchidaceae	Cultivated	Tree
Crinum asiaticum	Amaryllidaceae	Cultivated	Herb
Curculigo orchioides	Amaryllidaceae	Cultivated	Herb
Curculigo capitulata	Amaryllidaceae	Cultivated	Herb
Allium chinense	Amaryllidaceae	Cultivated	Herb
Hymenocallis littoralis	Amaryllidaceae	Cultivated	Tree, Shrub, Herb
Hippeastrum reticulatum	Amaryllidaceae	Cultivated	Herb
Hippeastrum striatum	Amaryllidaceae	Cultivated	Herb
Crinum moorei	Amaryllidaceae	Cultivated	Herb
Dracaena sanderianaSander	Asparagaceae	Cultivated	Shrub, Herb
Rohdea japonica	Asparagaceae	Cultivated	Herb
Rohdea chinensis	Asparagaceae	Cultivated	Shrub, Herb
Cordyline fruticosa	Asparagaceae	Cultivated	Shrub, Herb
Ophiopogon bodinieri	Asparagaceae	Cultivated	Herb
Asparagus cochinchinensis	Asparagaceae	Cultivated	Herb
Ophiopogon intermedius	Asparagaceae	Cultivated	Shrub, Herb
Reineckea carnea	Asparagaceae	Cultivated	Shrub, Herb
Agave americana	Asparagaceae	Cultivated	Herb
Chlorophytum comosum	Asparagaceae	Cultivated	Herb
Wodyetia bifurcata	Arecaceae	Cultivated	Tree, Shrub
Chrysalidocarpus lutescens	Arecaceae	Cultivated	Shrub
Phoenix roebelenii	Arecaceae	Cultivated	Shrub, Herb
Phoenix sylvestris	Arecaceae	Cultivated	Tree, Shrub
Caryota mitis	Arecaceae	Cultivated	Tree, Shrub
Washingtonia robusta	Arecaceae	Cultivated	Shrub
Phoenix hanceana	Arecaceae	Cultivated	Shrub
Corypha umbraculifera	Arecaceae	Cultivated	Shrub
PhoenixcanariensisChabaud	Arecaceae	Cultivated	Shrub
Archontophoenixalexandrae	Arecaceae	Cultivated	Shrub
Hyophorbe lagenicaulis	Arecaceae	Cultivated	Tree
Dypsis decaryi	Arecaceae	Cultivated	Tree
Areca triandra	Arecaceae	Cultivated	Shrub
Washingtonia filifera	Arecaceae	Cultivated	Tree, Shrub
Elaeis guineensis	Arecaceae	Cultivated	Tree, Shrub
Caryota maxima	Arecaceae	Cultivated	Tree
Trachycarpus fortunei	Arecaceae	Cultivated	Tree
Syagrus romanzoffiana	Arecaceae	Cultivated	Shrub
Cocos nucifera	Arecaceae	Cultivated	Tree, Shrub
Arenga engleri	Arecaceae	Cultivated	Shrub
Areca catechu	Arecaceae	Cultivated	Tree, Shrub
Roystonea regia	Arecaceae	Cultivated	Tree
Trachycarpus nana	Arecaceae	Cultivated	Shrub
Livistona chinensis	Arecaceae	Cultivated	Tree, Shrub
Tradescantia spathacea	Commelinaceae	Cultivated	Herb
Murdannia loriformis	Commelinaceae	Spontaneously growing	Herb
Commelina diffusa	Commelinaceae	Cultivated	Herb
Commelina communis	Commelinaceae	Spontaneously growing	Herb
Commelina paludosa	Commelinaceae	Cultivated	Herb
Murdannia triquetra	Commelinaceae	Cultivated	Herb
Strelitzia nicolaiBegel	Strelitziaceae	Cultivated	Shrub, Herb
Ravenala madagascariensis	Strelitziaceae	Cultivated	Shrub, Herb
Heliconia metallica	Heliconiaceae	Cultivated	Herb
Heliconia psittacorum	Heliconiaceae	Cultivated	Herb
Musa basjoo	Musaceae	Cultivated	Herb
Musa nana	Musaceae	Cultivated	Herb
Canna glauca	Cannaceae	Cultivated	Herb
Canna indica	Cannaceae	Cultivated	Herb
Canna orchioides	Cannaceae	Cultivated	Herb
Canna warszewiczii	Cannaceae	Cultivated	Herb
Phrynium rheedei	Marantaceae	Cultivated	Herb
Maranta arundinacea	Marantaceae	Cultivated	Herb
Curcuma phaeocaulis	Zingiberaceae	Cultivated	Herb
Alpinia zerumbet	Zingiberaceae	Cultivated	Herb
Alpinia hainanensis	Zingiberaceae	Cultivated	Herb
Cyperus rotundus	Cyperaceae	Spontaneously growing	Herb
Cyperus microiria	Cyperaceae	Spontaneously growing	Herb
Eleocharis yokoscensis	Cyperaceae	Spontaneously growing	Herb
Cyperus iria	Cyperaceae	Spontaneously growing	Herb
Cyperus difformis	Cyperaceae	Spontaneously growing	Herb
Carex siderosticta	Cyperaceae	Spontaneously growing	Herb
Kyllinga brevifolia	Cyperaceae	Spontaneously growing	Herb
Cynodon dactylon	Poaceae	Cultivated or Spontaneously growing	Herb
Eleusine indica	Poaceae	Spontaneously growing	Herb
Axonopus compressus	Poaceae	Cultivated or Spontaneously growing	Herb
Zoysia japonica	Poaceae	Cultivated or Spontaneously growing	Herb
Paspalum distichum	Poaceae	Spontaneously growing	Herb
Paspalum conjugatum	Poaceae	Spontaneously growing	Herb
Bambusa multiplex	Poaceae	Cultivated	Herb
Rottboellia cochinchinensis	Poaceae	Spontaneously growing	Herb
Oplismenus compositus	Poaceae	Spontaneously growing	Herb
Paspalum thunbergii	Poaceae	Spontaneously growing	Herb
Imperata cylindrica	Poaceae	Spontaneously growing	Herb
Panicum repens	Poaceae	Spontaneously growing	Herb
Zea mays	Poaceae	Cultivated	Herb
Digitaria sanguinalis	Poaceae	Spontaneously growing	Herb
Cenchrus echinatus	Poaceae	Spontaneously growing	Herb
Setaria viridis	Poaceae	Spontaneously growing	Herb
Melinis repens	Poaceae	Spontaneously growing	Herb
Saccharum officinarum	Poaceae	Cultivated	Shrub
Dactyloctenium aegyptium	Poaceae	Spontaneously growing	Herb
Miscanthus sinensis	Poaceae	Spontaneously growing	Herb
Fortunearia sinensis	Hamamelidaceae	Cultivated	Shrub
Sinowilsonia henryi	Hamamelidaceae	Cultivated	Shrub
Loropetalum chinense	Hamamelidaceae	Cultivated	Shrub
Parthenocissus tricuspidata	Vitaceae	Cultivated	Shrub
Parthenocissus semicordata	Vitaceae	Cultivated	Shrub
Causonis japonica	Vitaceae	Cultivated	Shrub
Cissus hexangularis	Vitaceae	Cultivated	Shrub
Samanea saman	Fabaceae	Cultivated	Tree, Shrub
Leucaenaleucocephala	Fabaceae	Cultivated	Tree, Shrub, Herb
Desmodium triflorum	Fabaceae	Spontaneously growing	Herb
Albizia lebbeck	Fabaceae	Cultivated	Tree
Mimosa diplotricha	Fabaceae	Cultivated	Tree, Shrub, Herb
Alysicarpus vaginalis	Fabaceae	Spontaneously growing	Herb
Macroptilium atropurpureum	Fabaceae	Spontaneously growing	Herb
Cassia fistula	Fabaceae	Cultivated	Tree
Indigofera tinctoriaLinn	Fabaceae	Cultivated	Tree, Shrub, Herb
Caesalpinia pulcherrima	Fabaceae	Cultivated	Shrub
Desmodium heterocarpon	Fabaceae	Spontaneously growing	Herb
Arachis hypogaea	Fabaceae	Cultivated	Tree, Shrub, Herb
Caesalpinia sappan	Fabaceae	Cultivated	Tree
Kummerowia striata	Fabaceae	Cultivated	Tree, Shrub, Herb
Bauhinia purpurea	Fabaceae	Cultivated	Tree
Albizia falcataria	Fabaceae	Cultivated	Tree, Shrub, Herb
Acacia catechu	Fabaceae	Cultivated	Tree, Shrub, Herb
Cladrastis platycarpa	Fabaceae	Cultivated	Tree, Shrub, Herb
Robinia pseudoacacia	Fabaceae	Cultivated	Tree, Shrub, Herb
Delonix regia	Fabaceae	Cultivated	Tree, Shrub
Erythrophleum fordii	Fabaceae	Cultivated	Tree, Shrub, Herb
Ormosia pinnata	Fabaceae	Cultivated	Tree
Tadehagi triquetrum	Fabaceae	Cultivated	Tree, Shrub, Herb
Sophora japonica	Fabaceae	Cultivated	Tree, Shrub, Herb
Arachis duranensis	Fabaceae	Cultivated or Spontaneously growing	Herb
Caesalpinia decapetala	Fabaceae	Cultivated	Tree, Shrub, Herb
Senna alata	Fabaceae	Cultivated	Tree, Shrub, Herb
Acacia confusa	Fabaceae	Cultivated	Tree, Shrub
Pongamia pinnata	Fabaceae	Cultivated	Tree, Shrub, Herb
Castanospermum australe	Fabaceae	Cultivated	Tree, Shrub, Herb
Vachellia farnesiana	Fabaceae	Cultivated	Tree, Shrub, Herb
Erythrina crista-galli	Fabaceae	Cultivated	Tree, Shrub
Hylodesmum podocarpum	Fabaceae	Cultivated	Tree, Shrub, Herb
Lablab purpureus	Fabaceae	Cultivated	Tree, Shrub, Herb
Vigna unguiculata	Fabaceae	Cultivated	Tree, Shrub, Herb
Senna tora	Fabaceae	Cultivated	Tree, Shrub, Herb
Leptodesmia microphylla	Fabaceae	Cultivated	Tree, Shrub, Herb
Chamaecrista nictitans	Fabaceae	Cultivated	Tree, Shrub, Herb
Pleurolobus gangeticus	Fabaceae	Spontaneously growing	Herb
Mimosa pudica	Fabaceae	Spontaneously growing	Herb
Crotalaria albida	Fabaceae	Cultivated	Tree, Shrub, Herb
Crotalaria trichotoma	Fabaceae	Cultivated	Tree, Shrub, Herb
Dalbergia mimosoides	Fabaceae	Cultivated	Tree, Shrub, Herb
Albizia chinensis	Fabaceae	Cultivated	Tree, Shrub, Herb
Albizia julibrissin	Fabaceae	Cultivated	Tree, Shrub, Herb
Dalbergia hainanensis	Fabaceae	Cultivated	Tree, Shrub, Herb
Bauhinia × blakeana	Fabaceae	Cultivated	Tree, Shrub, Herb
Tamarindus indica	Fabaceae	Cultivated	Tree
Dalbergia benthamii	Fabaceae	Cultivated	Tree, Shrub, Herb
Styphnolobium japonicum	Fabaceae	Cultivated	Tree, Shrub, Herb
Millettia pulchra	Fabaceae	Cultivated	Tree, Shrub, Herb
Sindora tonkinensis	Fabaceae	Cultivated	Tree, Shrub, Herb
Acacia mangium	Fabaceae	Cultivated	Tree, Shrub, Herb
Acacia auriculiformis	Fabaceae	Cultivated	Tree
Calliandra haematocephala	Fabaceae	Cultivated	Shrub
Lathyrus davidii	Fabaceae	Cultivated	Tree, Shrub, Herb
Pterocarpus indicus	Fabaceae	Cultivated	Tree
Acrocarpus fraxinifolius	Fabaceae	Cultivated	Tree, Shrub, Herb
Vigna angularis	Fabaceae	Cultivated	Tree, Shrub, Herb
Rhamnus leptophylla	Rhamnaceae	Spontaneously growing	Shrub
Broussonetia kazinoki	Moraceae	Cultivated	Tree
Ficus lyrata	Moraceae	Cultivated	Shrub
Ficus altissima	Moraceae	Cultivated	Tree
Paper Mulberry	Moraceae	Cultivated	Tree
Ficus benjamina	Moraceae	Cultivated	Tree, Shrub
Ficus microcarpa	Moraceae	Cultivated	Tree, Shrub, Herb
Ficus stenophylla	Moraceae	Cultivated	Tree
Ficus hispida	Moraceae	Spontaneously growing	Tree
Ficus pumila	Moraceae	Cultivated	Tree
Ficus concinna	Moraceae	Cultivated	Tree
Ficus tinctoria	Moraceae	Cultivated	Tree
Ficus variegata	Moraceae	Cultivated	Tree
Ficus tikoua	Moraceae	Cultivated	Tree
Ficus deltoidea	Moraceae	Cultivated	Tree
Humulus scandens	Moraceae	Cultivated	Tree
Ficus religiosa	Moraceae	Cultivated	Tree
Broussonetia papyrifera	Moraceae	Cultivated	Tree
Ficus racemosa	Moraceae	Cultivated	Tree
Ficus fistulosa	Moraceae	Cultivated	Tree
Artocarpus communis	Moraceae	Cultivated	Tree
Morus australis	Moraceae	Cultivated	Tree
Broussonetia papyrifera	Moraceae	Cultivated	Tree
Ficus esquiroliana	Moraceae	Cultivated	Tree
Ficus virens	Moraceae	Cultivated	Tree, Shrub
Fatoua villosa	Moraceae	Cultivated	Tree
Ficus elastica	Moraceae	Cultivated	Tree
Artocarpus heterophyllus	Moraceae	Cultivated	Tree
Morus alba	Moraceae	Cultivated	Tree
Ficus variolosa	Moraceae	Cultivated	Tree
Antiaris toxicaria	Moraceae	Cultivated	Tree
Quercus acutissima	Fagaceae	Cultivated	Tree
Castanopsis chinensis	Fagaceae	Cultivated	Tree
Castanopsis fargesii	Fagaceae	Cultivated	Tree
Coccinia grandis	Cucurbitaceae	Cultivated or Spontaneously growing	Herb
Actinostemma tenerum	Cucurbitaceae	Cultivated or Spontaneously growing	Herb
Cucurbita moschata	Cucurbitaceae	Cultivated or Spontaneously growing	Herb
Oxalis articulata	Oxalidaceae	Cultivated	Tree
Averrhoa carambola	Oxalidaceae	Cultivated	Tree
Oxalis debilis	Oxalidaceae	Cultivated	Tree
Oxalis corniculata	Oxalidaceae	Spontaneously growing	Herb
Oxalis triangularis	Oxalidaceae	Cultivated	Tree
Elaeocarpus hainanensis	Elaeocarpaceae	Cultivated	Tree
Elaeocarpus decipiens	Elaeocarpaceae	Cultivated	Tree
Carallia brachiata	Rhizophoraceae	Cultivated	Shrub
Bruguiera gymnorhiza	Rhizophoraceae	Cultivated	Shrub
Acalypha wilkesiana	Euphorbiaceae	Cultivated	Shrub
Jatropha integerrima	Euphorbiaceae	Cultivated	Tree, Shrub
Jatropha pandurifolia	Euphorbiaceae	Cultivated	Shrub
Euphorbia royleana	Euphorbiaceae	Cultivated	Shrub
Phyllanthus emblica	Euphorbiaceae	Cultivated	Shrub
Euphorbia pulcherrima	Euphorbiaceae	Cultivated	Shrub
Euphorbia sieboldiana	Euphorbiaceae	Cultivated	Shrub
Phyllanthus virgatus	Euphorbiaceae	Cultivated	Shrub
Bischofia javanica	Euphorbiaceae	Cultivated	Tree
Euphorbia lathyris	Euphorbiaceae	Cultivated	Shrub
Euphorbia milii	Euphorbiaceae	Cultivated	Shrub
Excoecaria acerifolia	Euphorbiaceae	Cultivated	Shrub
Aleurites moluccana	Euphorbiaceae	Cultivated	Shrub
Euphorbia thymifolia	Euphorbiaceae	Cultivated	Shrub
Euphorbia humifusa	Euphorbiaceae	Spontaneously growing	Herb
Bischofia polycarpa	Euphorbiaceae	Cultivated	Shrub
Manihot esculenta	Euphorbiaceae	Cultivated or Spontaneously growing	Shrub
Acalypha australis	Euphorbiaceae	Spontaneously growing	Herb
Sapium sebiferum	Euphorbiaceae	Cultivated	Shrub
Plukenetia volubilis	Euphorbiaceae	Cultivated	Shrub
Euphorbia hypericifolia	Euphorbiaceae	Spontaneously growing	Herb
Euphorbia maculata	Euphorbiaceae	Cultivated	Shrub
Euphorbia antiquorum	Euphorbiaceae	Cultivated	Shrub
Ricinus communis	Euphorbiaceae	Spontaneously growing	Shrub
Euphorbia tithymaloides	Euphorbiaceae	Cultivated	Shrub
Euphorbia esula	Euphorbiaceae	Cultivated	Shrub
Codiaeum variegatum	Euphorbiaceae	Cultivated	Tree, Shrub, Herb
Excoecaria cochinchinensis	Euphorbiaceae	Cultivated	Tree, Shrub, Herb
Phyllanthus cochinchinensis	Phyllanthaceae	Spontaneously growing	Shrub
Bridelia tomentosa	Phyllanthaceae	Spontaneously growing	Tree
Phyllanthus urinaria	Phyllanthaceae	Spontaneously growing	Herb
Breynia disticha	Phyllanthaceae	Spontaneously growing	Shrub
Phyllanthus reticulatus	Phyllanthaceae	Spontaneously growing	Shrub
Flueggea virosa	Phyllanthaceae	Spontaneously growing	Shrub
Phyllanthus ussuriensis	Phyllanthaceae	Spontaneously growing	Shrub
Passiflora foetida	Passifloraceae	Spontaneously growing	Herb
Passiflora edulis	Passifloraceae	Cultivated	Herb
Salix matsudana	Salicaceae	Cultivated	Shrub
Populus nigra	Salicaceae	Cultivated	Shrub
Populus przewalskii	Salicaceae	Cultivated	Shrub
Mesua ferrea	Clusiaceae	Cultivated	Shrub
Garcinia subelliptica	Clusiaceae	Cultivated	Shrub
Terminalia neotaliala	Combretaceae	Cultivated	Tree
Terminalia catappa	Combretaceae	Cultivated	Tree
Quisqualis indica	Combretaceae	Cultivated	Tree, Shrub, Herb
Lagerstroemia indica	Lythraceae	Cultivated	Tree, Shrub
Cuphea hookeriana	Lythraceae	Cultivated	Shrub, Herb
Lawsonia inermis	Lythraceae	Cultivated	Shrub, Herb
Lagerstroemia speciosa	Lythraceae	Cultivated	Tree
Cuphea balsamona	Lythraceae	Cultivated	Shrub, Herb
Eucalyptus robusta	Myrtaceae	Cultivated	Tree
Eucalyptus camaldulensis	Myrtaceae	Cultivated	Shrub
Syzygium hancei	Myrtaceae	Cultivated	Shrub
Syzygium samarangense	Myrtaceae	Cultivated	Tree, Shrub
Syzygium cumini	Myrtaceae	Cultivated	Shrub
Syzygium grijsii	Myrtaceae	Cultivated	Shrub
Eucalyptus citriodora	Myrtaceae	Cultivated	Shrub
Syzygium acuminatissimum	Myrtaceae	Cultivated	Shrub
Callistemon hybridus	Myrtaceae	Cultivated	Shrub
Plinia cauliflora	Myrtaceae	Cultivated	Shrub
Syzygium hainanense	Myrtaceae	Cultivated	Shrub
Myrtus communis	Myrtaceae	Cultivated	Shrub
Syzygium jambos	Myrtaceae	Cultivated or Spontaneously growing	Shrub
Psidium guajava	Myrtaceae	Cultivated	Shrub
Memecylon ligustrifolium	Melastomataceae	Cultivated	Shrub
Pleroma semidecandrum	Melastomataceae	Cultivated	Shrub
Dracontomelon duperreanum	Anacardiaceae	Cultivated	Tree
Rhus Typhina	Anacardiaceae	Cultivated	Tree, Shrub
Mangifera indica	Anacardiaceae	Cultivated	Tree
Cotinus coggygria	Anacardiaceae	Cultivated	Tree, Shrub
Koelreuteria paniculata	Sapindaceae	Cultivated	Tree
Nephelium lappaceum	Sapindaceae	Cultivated	Tree
Cardiospermum halicacabum	Sapindaceae	Cultivated	Tree
Litchi chinensis	Sapindaceae	Cultivated	Tree
Dimocarpus longan	Sapindaceae	Cultivated	Tree
Citrus maxima	Rutaceae	Cultivated or Spontaneously growing	Shrub
Murraya paniculata	Rutaceae	Cultivated	Shrub
Clausena lansium	Rutaceae	Spontaneously growing	Tree, Shrub
Phellodendron sinii	Rutaceae	Cultivated	Shrub
Zanthoxylum avicennae	Rutaceae	Cultivated	Shrub
Murraya exotica	Rutaceae	Cultivated	Shrub
Citrus reticulata	Rutaceae	Cultivated	Shrub
Tetradium daniellii	Rutaceae	Cultivated	Shrub
Citrus medica	Rutaceae	Cultivated	Shrub
Citrus × limon	Rutaceae	Cultivated	Shrub
Citrus × aurantium	Rutaceae	Cultivated	Shrub
Citrus japonica	Rutaceae	Cultivated	Shrub
Melia azedarach	Meliaceae	Spontaneously growing	Tree, Shrub
Aglaia odorata	Meliaceae	Cultivated	Shrub
Swietenia mahagoni	Meliaceae	Cultivated	Tree
Khayaseegalesis	Meliaceae	Cultivated	Tree
Toona sinensis	Meliaceae	Cultivated	Tree
Chukrasia tabularis	Meliaceae	Cultivated	Tree
Malvastrum coromandelianum	Malvaceae	Cultivated	Tree
Malvaviscus penduliflorus	Malvaceae	Cultivated	Tree
Sida acuta	Malvaceae	Spontaneously growing	Shrub, Herb
Urena lobata	Malvaceae	Spontaneously growing	Shrub
Sida yunnanensis	Malvaceae	Cultivated	Tree
Hibiscus tiliaceus	Malvaceae	Cultivated	Tree
Sida szechuensis	Malvaceae	Cultivated	Tree
Hibiscus rosa-sinensis	Malvaceae	Cultivated	Shrub
Hibiscus schizopetalus	Malvaceae	Cultivated	Tree
Sida rhombifolia	Malvaceae	Spontaneously growing	Shrub, Herb
Triumfetta rhomboidea	Malvaceae	Spontaneously growing	Herb
Heritiera parvifolia	Malvaceae	Cultivated	Tree
Abelmoschus esculentus	Malvaceae	Cultivated	Tree
Bombax ceiba	Malvaceae	Cultivated	Tree
Brachychiton acerifolius	Malvaceae	Cultivated	Tree
Brachychiton rupestris	Malvaceae	Cultivated	Tree
Carica papaya	Caricaceae	Cultivated or Spontaneously growing	Tree, Shrub
Persicaria hastatosagittata	Polygonaceae	Spontaneously growing	Herb
Pleuropterus multiflorus	Polygonaceae	Spontaneously growing	Herb
Silene conoidea	Caryophyllaceae	Spontaneously growing	Herb
Drymaria cordata	Caryophyllaceae	Spontaneously growing	Herb
Alternanthera bettzickiana	Amaranthaceae	Cultivated	Herb
Alternanthera sessilis	Amaranthaceae	Spontaneously growing	Herb
Alternanthera philoxeroides	Amaranthaceae	Spontaneously growing	Herb
Amaranthus viridis	Amaranthaceae	Spontaneously growing	Herb
Celosia cristata	Amaranthaceae	Spontaneously growing	Herb
Achyranthes aspera	Amaranthaceae	Spontaneously growing	Herb
Amaranthus blitum	Amaranthaceae	Spontaneously growing	Herb
Celosia argentea	Amaranthaceae	Spontaneously growing	Herb
Iresine herbstii	Amaranthaceae	Spontaneously growing	Herb
Dysphania schraderiana	Amaranthaceae	Spontaneously growing	Herb
Amaranthus spinosus	Amaranthaceae	Spontaneously growing	Herb
Gomphrena celosioides	Amaranthaceae	Spontaneously growing	Herb
Bougainvillea spectabilis	Nyctaginaceae	Cultivated	Shrub, Herb
Bougainvillea	Nyctaginaceae	Cultivated	Shrub, Herb
Bougainvillea glabra	Nyctaginaceae	Cultivated	Shrub, Herb
Boerhavia diffusa	Nyctaginaceae	Spontaneously growing	Herb
Portulaca oleracea	Portulacaceae	Cultivated or Spontaneously growing	Herb
Portulaca pilosa	Portulacaceae	Cultivated	Herb
Barringtonia macrostachya	Lecythidaceae	Cultivated	Tree
Mimusops elengi	Sapotaceae	Cultivated	Tree
Synsepalum dulcificum	Sapotaceae	Cultivated	Tree
Pouteria campechiana	Sapotaceae	Cultivated	Tree
Ardisia pusilla	Primulaceae	Spontaneously growing	Shrub, Herb
Stimpsonia chamaedryoides	Primulaceae	Spontaneously growing	Shrub, Herb
Mussaenda pubescens	Rubiaceae	Spontaneously growing	Herb
Spermacoce pusilla	Rubiaceae	Spontaneously growing	Herb
Hedyotis Chrysotricha	Rubiaceae	Spontaneously growing	Herb
Borrerialatifolia	Rubiaceae	Spontaneously growing	Herb
Morinda citrifolia	Rubiaceae	Cultivated	Shrub
Hedyotis diffusa	Rubiaceae	Spontaneously growing	Herb
Neolamarckia cadamba	Rubiaceae	Spontaneously growing	Herb
Paederia cruddasiana	Rubiaceae	Spontaneously growing	Herb
Gardenia jasminoides	Rubiaceae	Cultivated	Shrub
Hedyotis hedyotidea	Rubiaceae	Spontaneously growing	Herb
Rubia cordifolia	Rubiaceae	Spontaneously growing	Herb
Ixora chinensis	Rubiaceae	Cultivated	Tree, Shrub
Hedyotis corymbosa	Rubiaceae	Spontaneously growing	Herb
Hedyotis uncinella	Rubiaceae	Spontaneously growing	Herb
Psychotria asiatica	Rubiaceae	Spontaneously growing	Shrub
Ixora coccinea	Rubiaceae	Cultivated	Shrub
Hedyotis auricularia	Rubiaceae	Spontaneously growing	Herb
Fagraea ceilanica	Gentianaceae	Cultivated	Shrub
Tabernaemontana divaricata	Apocynaceae	Cultivated	Shrub
Catharanthus roseus	Apocynaceae	Cultivated or Spontaneously growing	Shrub, Herb
Nerium oleander	Apocynaceae	Cultivated	Shrub, Herb
Alstonia scholaris	Apocynaceae	Cultivated	Tree
Plumeria obtusa	Apocynaceae	Cultivated	Tree
Allamanda cathartica	Apocynaceae	Cultivated	Shrub
Nerium indicum	Apocynaceae	Cultivated	Tree
Thevetia peruviana	Apocynaceae	Cultivated	Shrub
Trachelospermum jasminoides	Apocynaceae	Cultivated	Tree
Wrightia pubescens	Apocynaceae	Cultivated	Tree
Plumeria rubra	Apocynaceae	Cultivated	Tree, Shrub
Cryptostegia grandiflora	Apocynaceae	Cultivated	Tree
Trigonotis peduncularis	Boraginaceae	Cultivated	Shrub
Heliotropium indicum	Boraginaceae	Spontaneously growing	Herb
Thyrocarpus sampsonii	Boraginaceae	Cultivated	Shrub
Lappula myosotis	Boraginaceae	Cultivated	Shrub
Carmona microphylla	Boraginaceae	Cultivated	Shrub
Cuscuta japonica	Convolvulaceae	Spontaneously growing	Herb
Ipomoea biflora	Convolvulaceae	Spontaneously growing	Herb
Merremia sibirica	Convolvulaceae	Spontaneously growing	Herb
Ipomoea cairica	Convolvulaceae	Spontaneously growing	Herb
Dichondra micrantha	Convolvulaceae	Spontaneously growing	Herb
Ipomoea obscura	Convolvulaceae	Spontaneously growing	Herb
Ipomoea batatas	Convolvulaceae	Cultivated or Spontaneously growing	Herb
Ipomoea aquatica	Convolvulaceae	Cultivated or Spontaneously growing	Herb
Ipomoea carnea	Convolvulaceae	Spontaneously growing	Herb
Camonea vitifolia	Convolvulaceae	Spontaneously growing	Herb
Solanum nigrum	Solanaceae	Spontaneously growing	Herb
Cestrum nocturnum	Solanaceae	Cultivated	Herb
Brunfelsia latifolia	Solanaceae	Spontaneously growing	Herb
Solanum americanum	Solanaceae	Spontaneously growing	Herb
Capsicum annuum	Solanaceae	Spontaneously growing	Herb
Solandra maxima	Solanaceae	Spontaneously growing	Herb
olanumpseudocapsicum	Solanaceae	Spontaneously growing	Herb
Solanum torvum	Solanaceae	Spontaneously growing	Herb
Solanum texanum	Solanaceae	Spontaneously growing	Herb
Physalis philadelphica	Solanaceae	Spontaneously growing	Herb
Solanum pseudocapsicum	Solanaceae	Spontaneously growing	Herb
Solanum tuberosum	Solanaceae	Cultivated	Herb
Jasminum sambac	Oleaceae	Cultivated	Shrub
Ligustrum obtusifolium	Oleaceae	Cultivated	Herb
Osmanthus fragrans	Oleaceae	Cultivated	Herb
Syringa oblata	Oleaceae	Cultivated	Herb
Ligustrum × vicaryi	Oleaceae	Cultivated	Herb
Osmanthus	Oleaceae	Cultivated	Herb
Forsythia suspensa	Oleaceae	Cultivated	Herb
Ligustrum lucidum	Oleaceae	Cultivated	Herb
Ligustrum sinense	Oleaceae	Cultivated or Spontaneously growing	Shrub
Olea europaea	Oleaceae	Cultivated	Herb
Salvia miltiorrhiza	Lamiaceae	Cultivated	Shrub
Mosla dianthera	Lamiaceae	Cultivated	Shrub
Salvia chinensis	Lamiaceae	Cultivated	Shrub
Mentha spicata	Lamiaceae	Cultivated	Shrub
Clinopodium megalanthum	Lamiaceae	Cultivated	Shrub
Clerodendrum quadriloculare	Lamiaceae	Cultivated	Shrub
Salvia bowleyana	Lamiaceae	Cultivated	Shrub
Ocimum basilicum	Lamiaceae	Spontaneously growing	Herb
Mentha canadensis	Lamiaceae	Cultivated	Shrub
Coleus scutellarioides	Lamiaceae	Cultivated	Shrub
Clerodendrum chinense	Lamiaceae	Cultivated	Shrub
Elsholtzia argyi	Lamiaceae	Cultivated	Shrub
Vitex negundo	Lamiaceae	Cultivated	Shrub
Isodon excisus	Lamiaceae	Cultivated	Shrub
Salvia plebeia	Lamiaceae	Cultivated	Shrub
Ruellia simplex	Acanthaceae	Cultivated	Shrub, Herb
Asystasia gangetica	Acanthaceae	Cultivated or Spontaneously growing	Shrub
Clinacanthus nutans	Acanthaceae	Cultivated or Spontaneously growing	Shrub
Ruellia brittoniana	Acanthaceae	Cultivated or Spontaneously growing	Shrub
Sanchezia nobilis	Acanthaceae	Cultivated or Spontaneously growing	Shrub
Barleria cristata	Acanthaceae	Cultivated or Spontaneously growing	Shrub
Lepidagathis incurva	Acanthaceae	Cultivated or Spontaneously growing	Shrub
Justicia gendarussa	Acanthaceae	Cultivated	Herb
Sanchezia oblonga	Acanthaceae	Cultivated or Spontaneously growing	Shrub
Justicia quadrifaria	Acanthaceae	Cultivated or Spontaneously growing	Shrub
Justicia procumbens	Acanthaceae	Spontaneously growing	Herb
Fittonia verschaffeltii	Acanthaceae	Cultivated or Spontaneously growing	Shrub
Ruellia elegans	Acanthaceae	Cultivated	Herb
Strobilanthes henryi	Acanthaceae	Cultivated or Spontaneously growing	Shrub
Dicliptera chinensis	Acanthaceae	Cultivated or Spontaneously growing	Shrub
Kigelia africana	Bignoniaceae	Cultivated	Tree
Handroanthus impetiginosus	Bignoniaceae	Cultivated	Tree
Handroanthus chrysanthus	Bignoniaceae	Cultivated	Tree
Oroxylum indicum	Bignoniaceae	Cultivated	Tree
Radermachera hainanensis	Bignoniaceae	Cultivated	Tree
Catalpa speciosa	Bignoniaceae	Cultivated	Tree
Dolichandrone stipulata	Bignoniaceae	Cultivated	Tree
Spathodea campanulata	Bignoniaceae	Cultivated	Tree
Campsis grandiflora	Bignoniaceae	Cultivated	Tree
Mansoa alliacea	Bignoniaceae	Cultivated	Tree
Jacaranda mimosifolia	Bignoniaceae	Cultivated	Tree
Radermachera sinica	Bignoniaceae	Cultivated	Tree
Catalpa ovata	Bignoniaceae	Cultivated	Tree
Catalpa fargesii	Bignoniaceae	Cultivated	Tree
Duranta repens	Verbenaceae	Cultivated	Shrub, Herb
Duranta erecta	Verbenaceae	Cultivated	Tree, Shrub
Lantana montevidensis	Verbenaceae	Cultivated	Shrub, Herb
Vitex quinata	Verbenaceae	Cultivated	Shrub, Herb
Lantana camara	Verbenaceae	Cultivated or Spontaneously growing	Shrub
Verbena officinalis	Verbenaceae	Cultivated	Shrub, Herb
Petrea volubilis	Verbenaceae	Cultivated	Shrub, Herb
Stachytarpheta jamaicensis	Verbenaceae	Spontaneously growing	Herb
Scaevola taccada	Goodeniaceae	Cultivated	Shrub, Herb
Emilia sonchifolia	Asteraceae	Spontaneously growing	Herb
Taraxacum mongolicum	Asteraceae	Spontaneously growing	Herb
Blumea mollis	Asteraceae	Spontaneously growing	Herb
Synedrella nodiflora	Asteraceae	Spontaneously growing	Herb
Vernonia esculenta	Asteraceae	Spontaneously growing	Herb
Erigeron acris	Asteraceae	Spontaneously growing	Herb
Crassocephalum crepidioides	Asteraceae	Spontaneously growing	Herb
Parthenium hysterophorus	Asteraceae	Spontaneously growing	Herb
Tridax procumbens	Asteraceae	Spontaneously growing	Herb
Eschenbachia japonica	Asteraceae	Spontaneously growing	Herb
Emilia prenanthoidea	Asteraceae	Spontaneously growing	Herb
Erigeron sumatrensis	Asteraceae	Spontaneously growing	Herb
Vernonia amygdalina	Asteraceae	Spontaneously growing	Herb
Artemisia indica	Asteraceae	Spontaneously growing	Herb
Ambrosia trifida	Asteraceae	Spontaneously growing	Herb
Mikania micrantha	Asteraceae	Spontaneously growing	Herb
Wedelia chinensis	Asteraceae	Spontaneously growing	Herb
Vernonia cinerea	Asteraceae	Spontaneously growing	Herb
Laggera pterodonta	Asteraceae	Spontaneously growing	Herb
Eclipta prostrata	Asteraceae	Spontaneously growing	Herb
Galinsoga quadriradiata	Asteraceae	Spontaneously growing	Herb
Eupatorium odoratum	Asteraceae	Spontaneously growing	Herb
Erigeron canadensis	Asteraceae	Spontaneously growing	Herb
Bidens biternata	Asteraceae	Spontaneously growing	Herb
Gerbera anandria	Asteraceae	Spontaneously growing	Herb
Elephantopus scaber	Asteraceae	Spontaneously growing	Herb
Blumea megacephala	Asteraceae	Spontaneously growing	Herb
Crepidiastrum lanceolatum	Asteraceae	Spontaneously growing	Herb
Sonchus wightianus	Asteraceae	Spontaneously growing	Herb
Sonchus oleraceus	Asteraceae	Spontaneously growing	Herb
Artemisia selengensis	Asteraceae	Spontaneously growing	Herb
Nouelia insignis	Asteraceae	Spontaneously growing	Herb
Gamochaeta pensylvanica	Asteraceae	Spontaneously growing	Herb
Cichorium intybus	Asteraceae	Spontaneously growing	Herb
Lactuca sibirica	Asteraceae	Spontaneously growing	Herb
Sphagneticola trilobata	Asteraceae	Cultivated or Spontaneously growing	Herb
Cyanthillium cinereum	Asteraceae	Spontaneously growing	Herb
Artemisia lancea	Asteraceae	Spontaneously growing	Herb
Blumea balsamifera	Asteraceae	Spontaneously growing	Herb
Youngia japonica	Asteraceae	Spontaneously growing	Herb
Crassocephalum rubens	Asteraceae	Spontaneously growing	Herb
Blumea sinuata	Asteraceae	Spontaneously growing	Herb
Ambrosia artemisiifolia	Asteraceae	Spontaneously growing	Herb
Carthamus tinctorius	Asteraceae	Spontaneously growing	Herb
Zinnia elegans	Asteraceae	Spontaneously growing	Herb
Artemisia argyi	Asteraceae	Spontaneously growing	Herb
Scorzonera albicaulis	Asteraceae	Spontaneously growing	Herb
Ainsliaea latifolia	Asteraceae	Spontaneously growing	Herb
Ageratum conyzoides	Asteraceae	Spontaneously growing	Herb
Gnaphalium japonicum	Asteraceae	Spontaneously growing	Herb
Crepidiastrum sonchifolium	Asteraceae	Spontaneously growing	Herb
Glebionis segetum	Asteraceae	Spontaneously growing	Herb
Lactuca sativa	Asteraceae	Spontaneously growing	Herb
Ixeridium dentatum	Asteraceae	Spontaneously growing	Herb
Dahlia pinnata	Asteraceae	Spontaneously growing	Herb
Petasites japonicus	Asteraceae	Spontaneously growing	Herb
Artemisia japonica	Asteraceae	Spontaneously growing	Herb
Bidens alba	Asteraceae	Spontaneously growing	Herb
Symphyotrichum subulatum	Asteraceae	Spontaneously growing	Herb
Adenostemma lavenia	Asteraceae	Spontaneously growing	Herb
Youngia heterophylla	Asteraceae	Spontaneously growing	Herb
Praxelis clematidea	Asteraceae	Spontaneously growing	Herb
Bidens pilosa	Asteraceae	Spontaneously growing	Herb
Schefflera arboricola	Araliaceae	Cultivated	Tree, Shrub, Herb
Dizygotheca elegantissima	Araliaceae	Cultivated	Tree, Shrub
Heteropanax fragrans	Araliaceae	Cultivated	Tree
Schefflera octophylla	Araliaceae	Cultivated	Tree, Shrub
Heptapleurum actinophyllum	Araliaceae	Cultivated	Tree, Shrub
Polyscias scutellaria	Araliaceae	Cultivated	Tree, Shrub
Hydrocotyle sibthorpioides	Apiaceae	Spontaneously growing	Herb
Hydrocotyle vulgaris	Apiaceae	Cultivated	Herb

## Sheet: Sanya
Plant list in the build-up area of Sanya recorded in investigation
Latin name	Family name	Cultivated or Spontaneously growing	Life form
Lygodium japonicum	Lygodiaceae	Spontaneously growing	Herb
Pteris vittata	Pteridaceae	Spontaneously growing	Herb
Adiantum capillus-veneris	Pteridaceae	Cultivated	Herb
Nephrolepis biserrata	Nephrolepidaceae	Cultivated	Herb
Nephrolepis cordifolia	Nephrolepidaceae	Cultivated	Herb
Cycas revoluta	Cycadaceae	Cultivated	Shrub
Araucaria cunninghamii	Araucariaceae	Cultivated	Tree
Podocarpus macrophyllus	Podocarpaceae	Cultivated	Shrub
Piper sarmentosum	Piperaceae	Cultivated	Herb
Michelia alba	Magnoliaceae	Cultivated	Tree
Polyalthia longifolia	Annonaceae	Cultivated	Tree
Annona squamosa	Annonaceae	Cultivated	Shrub
Litsea glutinosa	Lauraceae	Spontaneously growing	Tree
Cinnamomum camphora	Lauraceae	Cultivated	Tree
Cassytha filiformis	Lauraceae	Spontaneously growing	Tree
Aglaonema nitidum	Araceae	Cultivated	Herb
Syngonium podophyllum	Araceae	Cultivated	Herb
Dieffenbachia seguine	Araceae	Cultivated	Herb
Alocasia odora	Araceae	Cultivated	Herb
Epipremnum aureum	Araceae	Cultivated	Herb
Dioscorea polystachya	Dioscoreaceae	Cultivated	Herb
Pandanus utilis	Pandanaceae	Cultivated	Shrub
Pandanus urophyllus	Pandanaceae	Cultivated	Shrub
Neomarica gracilis	Iridaceae	Cultivated	Herb
Iris domestica	Iridaceae	Cultivated	Herb
Dianella ensifolia	Xanthorrhoeaceae	Cultivated or Spontaneously growing	Herb
Zephyranthes candida	Amaryllidaceae	Cultivated	Herb
Hippeastrum striatum	Amaryllidaceae	Cultivated	Herb
Hymenocallis littoralis	Amaryllidaceae	Cultivated	Tree, Shrub, Herb
Crinum asiaticum	Amaryllidaceae	Cultivated	Herb
Zephyranthes minuta	Amaryllidaceae	Cultivated	Herb
Cordyline fruticosa	Asparagaceae	Cultivated	Shrub, Herb
Asparagus cochinchinensis	Asparagaceae	Cultivated	Herb
Dracaena fragrans	Asparagaceae	Cultivated	Shrub
Dracaena reflexa	Asparagaceae	Cultivated	Shrub
Dracaena cambodiana	Asparagaceae	Cultivated	Tree, Shrub
Dracaena draco	Asparagaceae	Cultivated	Shrub
Dracaena marginata	Asparagaceae	Cultivated	Shrub
Furcraea foetida	Asparagaceae	Cultivated	Herb
Ophiopogon bodinieri	Asparagaceae	Cultivated	Herb
Sansevieria trifasciata	Asparagaceae	Cultivated	Shrub, Herb
Agave sisalana	Asparagaceae	Cultivated	Shrub, Herb
Butia capitata	Arecaceae	Cultivated	Shrub
Chamaedorea elegans	Arecaceae	Cultivated	Shrub
Cocos nucifera	Arecaceae	Cultivated	Tree, Shrub
Dypsis decaryi	Arecaceae	Cultivated	Tree
Latania loddigesii	Arecaceae	Cultivated	Tree
Phoenix sylvestris	Arecaceae	Cultivated	Tree, Shrub
Ptychosperma macarthurii	Arecaceae	Cultivated	Tree
Trachycarpus fortunei	Arecaceae	Cultivated	Tree
Borassus flabellifer	Arecaceae	Cultivated	Tree
Elaeis guineensis	Arecaceae	Cultivated	Tree, Shrub
Hyophorbe lagenicaulis	Arecaceae	Cultivated	Shrub
Latania lontaroides	Arecaceae	Cultivated	Shrub
Phoenix canariensis	Arecaceae	Cultivated	Tree
Phoenix roebelenii	Arecaceae	Cultivated	Shrub, Herb
Roystonea regia	Arecaceae	Cultivated	Tree
Wodyetia bifurcata	Arecaceae	Cultivated	Tree, Shrub
Dypsis lutescens	Arecaceae	Cultivated	Tree, Shrub
Rhapis excelsa	Arecaceae	Cultivated	Shrub, Herb
Rhapis gracilis	Arecaceae	Cultivated	Shrub
Archontophoenix alexandrae	Arecaceae	Cultivated	Tree
Areca catechu	Arecaceae	Cultivated	Tree, Shrub
Areca triandra	Arecaceae	Cultivated	Shrub
Bismarckia nobilis	Arecaceae	Cultivated	Tree
Hyophorbe verschaffeltii	Arecaceae	Cultivated	Tree
Livistona chinensis	Arecaceae	Cultivated	Tree, Shrub
Washingtonia filifera	Arecaceae	Cultivated	Tree, Shrub
Caryota mitis	Arecaceae	Cultivated	Tree, Shrub
Caryota maxima	Arecaceae	Cultivated	Tree, Shrub
Tradescantia spathacea	Commelinaceae	Cultivated	Herb
Commelina communis	Commelinaceae	Spontaneously growing	Herb
Commelina benghalensis	Commelinaceae	Spontaneously growing	Herb
Pontederia cordata	Pontederiaceae	Cultivated	Herb
Ravenala madagascariensis	Strelitziaceae	Cultivated	Shrub, Herb
Strelitzia reginae	Strelitziaceae	Cultivated	Shrub, Herb
Heliconia bihai	Heliconiaceae	Cultivated	Herb
Musa acuminata	Musaceae	Cultivated	Herb
Musa basjoo	Musaceae	Cultivated	Herb
Canna indica	Cannaceae	Cultivated	Herb
Etlingera elatior	Zingiberaceae	Cultivated	Herb
Alpinia japonica	Zingiberaceae	Cultivated	Herb
Alpinia zerumbet	Zingiberaceae	Cultivated	Herb
Typha angustifolia	Typhaceae	Spontaneously growing	Herb
Kyllinga nemoralis	Cyperaceae	Spontaneously growing	Herb
Cyperus papyrus	Cyperaceae	Spontaneously growing	Herb
Cyperus rotundus	Cyperaceae	Spontaneously growing	Herb
Cyperus alternifolius	Cyperaceae	Spontaneously growing	Herb
Fimbristylis dichotoma	Cyperaceae	Spontaneously growing	Herb
Cyperus iria	Cyperaceae	Spontaneously growing	Herb
Axonopus compressus	Poaceae	Cultivated or Spontaneously growing	Herb
Zoysia japonica	Poaceae	Cultivated or Spontaneously growing	Herb
Bambusa multiplex	Poaceae	Cultivated	Herb
Bambusa tuldoides	Poaceae	Cultivated	Shrub
Cenchrus alopecuroides	Poaceae	Spontaneously growing	Herb
Brachiaria subquadripara	Poaceae	Spontaneously growing	Herb
Cenchrus echinatus	Poaceae	Spontaneously growing	Herb
Chloris formosana	Poaceae	Spontaneously growing	Herb
Chrysopogon aciculatus	Poaceae	Spontaneously growing	Herb
Cyrtococcum patens	Poaceae	Spontaneously growing	Herb
Digitaria radicosa	Poaceae	Spontaneously growing	Herb
Digitaria sanguinalis	Poaceae	Spontaneously growing	Herb
Echinochloa colona	Poaceae	Spontaneously growing	Herb
Paspalum conjugatum	Poaceae	Spontaneously growing	Herb
Paspalum thunbergii	Poaceae	Spontaneously growing	Herb
Cynodon dactylon	Poaceae	Cultivated or Spontaneously growing	Herb
Dactyloctenium aegyptium	Poaceae	Spontaneously growing	Herb
Eleusine indica	Poaceae	Spontaneously growing	Herb
Imperata cylindrica	Poaceae	Spontaneously growing	Herb
Melinis repens	Poaceae	Spontaneously growing	Herb
Panicum repens	Poaceae	Spontaneously growing	Herb
Setaria viridis	Poaceae	Spontaneously growing	Herb
Arundo donax	Poaceae	Spontaneously growing	Herb
Eragrostis tenella	Poaceae	Spontaneously growing	Herb
Zoysia sinica	Poaceae	Spontaneously growing	Herb
Miscanthus sinensis	Poaceae	Spontaneously growing	Herb
Loropetalum chinense	Hamamelidaceae	Cultivated	Shrub
Parthenocissus dalzielii	Vitaceae	Cultivated	Shrub
Caesalpinia pulcherrima	Fabaceae	Cultivated	Tree, Shrub, Herb
Acacia podalyriifolia	Fabaceae	Cultivated	Tree
Mimosa invisa	Fabaceae	Spontaneously growing	Herb
Desmodium heterocarpon	Fabaceae	Spontaneously growing	Herb
Leucaena leucocephala	Fabaceae	Cultivated	Tree
Acacia auriculiformis	Fabaceae	Cultivated	Tree
Dalbergia odorifera	Fabaceae	Cultivated	Tree, Shrub
Derris trifoliata	Fabaceae	Cultivated	Shrub
Peltophorum pterocarpum	Fabaceae	Cultivated	Tree
Macroptilium atropurpureum	Fabaceae	Spontaneously growing	Herb
Mimosa bimucronata	Fabaceae	Spontaneously growing	Tree, Shrub
Stylosanthes guianensis	Fabaceae	Spontaneously growing	Herb
Pleurolobus gangeticus	Fabaceae	Spontaneously growing	Herb
Aeschynomene indica	Fabaceae	Spontaneously growing	Shrub
Chamaecrista mimosoides	Fabaceae	Spontaneously growing	Herb
Crotalaria pallida	Fabaceae	Spontaneously growing	Herb
Desmodium triflorum	Fabaceae	Spontaneously growing	Herb
Falcataria moluccana	Fabaceae	Cultivated	Herb
Guilandina minax	Fabaceae	Spontaneously growing	Shrub
Pueraria phaseoloides	Fabaceae	Spontaneously growing	Herb
Uraria crinita	Fabaceae	Spontaneously growing	Tree
Zornia gibbosa	Fabaceae	Spontaneously growing	Herb
Alysicarpus vaginalis	Fabaceae	Spontaneously growing	Herb
Canavalia rosea	Fabaceae	Spontaneously growing	Herb
Cassia fistula	Fabaceae	Cultivated	Tree
Erythrina crista-galli	Fabaceae	Cultivated	Tree, Shrub
Senna surattensis	Fabaceae	Cultivated	Tree, Shrub, Herb
Ormosia pinnata	Fabaceae	Cultivated	Tree
Bauhinia purpurea	Fabaceae	Cultivated	Tree
Mimosa pudica	Fabaceae	Spontaneously growing	Herb
Tamarindus indica	Fabaceae	Cultivated	Tree
Acacia confusa	Fabaceae	Cultivated	Tree, Shrub
Indigofera endecaphylla	Fabaceae	Cultivated	Herb
Arachis duranensis	Fabaceae	Cultivated or Spontaneously growing	Herb
Samanea saman	Fabaceae	Cultivated	Tree, Shrub
Calliandra haematocephala	Fabaceae	Cultivated	Shrub
Delonix regia	Fabaceae	Cultivated	Tree, Shrub
Sageretia thea	Rhamnaceae	Spontaneously growing	Shrub
Artocarpus altilis	Moraceae	Cultivated	Tree
Artocarpus heterophyllus	Moraceae	Cultivated	Tree
Streblus asper	Moraceae	Cultivated or Spontaneously growing	Tree, Shrub
Ficus binnendijkii	Moraceae	Cultivated	Tree, Shrub
Ficus benjamina	Moraceae	Cultivated	Tree, Shrub
Ficus hispida	Moraceae	Spontaneously growing	Tree
Ficus microcarpa	Moraceae	Cultivated	Tree, Shrub, Herb
Ficus religiosa	Moraceae	Cultivated	Tree
Ficus altissima	Moraceae	Cultivated	Tree
Ficus cyathistipula	Moraceae	Cultivated	Shrub
Ficus elastica	Moraceae	Cultivated	Tree
Ficus lyrata	Moraceae	Cultivated	Shrub
Ficus pandurata	Moraceae	Cultivated	Tree, Shrub
Ficus subpisocarpa	Moraceae	Cultivated	Tree
Ficus tinctoria	Moraceae	Cultivated	Tree
Ficus virens	Moraceae	Cultivated	Tree, Shrub
Pterocarpus indicus	Fagaceae	Cultivated	Tree
Casuarina equisetifolia	Casuarinaceae	Cultivated	Tree
Coccinia grandis	Cucurbitaceae	Cultivated or Spontaneously growing	Herb
Diplocyclos palmatus	Cucurbitaceae	Spontaneously growing	Herb
Citrullus lanatus	Cucurbitaceae	Spontaneously growing	Herb
Averrhoa carambola	Oxalidaceae	Cultivated	Tree
Oxalis corniculata	Oxalidaceae	Spontaneously growing	Herb
Elaeocarpus hainanensis	Elaeocarpaceae	Cultivated	Tree
Elaeocarpus rugosus	Elaeocarpaceae	Cultivated	Tree
Rhizophora stylosa	Rhizophoraceae	Cultivated	Shrub
Acalypha wilkesiana	Euphorbiaceae	Cultivated	Shrub
Codiaeum variegatum	Euphorbiaceae	Cultivated	Tree, Shrub, Herb
Euphorbia cyathophora	Euphorbiaceae	Spontaneously growing	Herb
Excoecaria cochinchinensis	Euphorbiaceae	Cultivated	Tree, Shrub, Herb
Microstachys chamaelea	Euphorbiaceae	Spontaneously growing	Herb
Euphorbia hirta	Euphorbiaceae	Spontaneously growing	Herb
Euphorbia humifusa	Euphorbiaceae	Spontaneously growing	Herb
Euphorbia hypericifolia	Euphorbiaceae	Spontaneously growing	Herb
Mallotus repandus	Euphorbiaceae	Spontaneously growing	Shrub
Ricinus communis	Euphorbiaceae	Spontaneously growing	Shrub
Acalypha australis	Euphorbiaceae	Spontaneously growing	Herb
Mallotus peltatus	Euphorbiaceae	Spontaneously growing	Shrub
Manihot esculenta	Euphorbiaceae	Cultivated or Spontaneously growing	Shrub
Jatropha integerrima	Euphorbiaceae	Cultivated	Tree, Shrub
Acalypha hispida	Euphorbiaceae	Cultivated	Shrub
Flueggea virosa	Phyllanthaceae	Spontaneously growing	Shrub
Bridelia tomentosa	Phyllanthaceae	Spontaneously growing	Tree
Antidesma bunius	Phyllanthaceae	Cultivated	Tree
Bischofia javanica	Phyllanthaceae	Cultivated	Tree
Phyllanthus urinaria	Phyllanthaceae	Spontaneously growing	Herb
Breynia fruticosa	Phyllanthaceae	Spontaneously growing	Shrub
Phyllanthus niruri	Phyllanthaceae	Spontaneously growing	Herb
Passiflora foetida	Passifloraceae	Spontaneously growing	Herb
Turnera ulmifolia	Passifloraceae	Cultivated or Spontaneously growing	Herb
Passiflora edulis	Passifloraceae	Cultivated	Herb
Flacourtia indica	Salicaceae	Cultivated	Shrub
Calophyllum inophyllum	Calophyllaceae	Cultivated	Tree
Garcinia spicata	Clusiaceae	Cultivated	Shrub
Combretum indicum	Combretaceae	Cultivated	Tree, Shrub, Herb
Terminalia catappa	Combretaceae	Cultivated	Tree
Terminalia neotaliala	Combretaceae	Cultivated	Tree
Cuphea hyssopifolia	Lythraceae	Cultivated	Shrub, Herb
Lagerstroemia indica	Lythraceae	Cultivated	Tree, Shrub
Lagerstroemia speciosa	Lythraceae	Cultivated	Tree
Ludwigia prostrata	Onagraceae	Spontaneously growing	Herb
Eugenia uniflora	Myrtaceae	Cultivated	Shrub
Psidium guajava	Myrtaceae	Cultivated	Shrub
Syzygium jambos	Myrtaceae	Cultivated or Spontaneously growing	Shrub
Syzygium samarangense	Myrtaceae	Cultivated	Tree, Shrub
Xanthostemon chrysanthus	Myrtaceae	Cultivated	Tree, Shrub
Callistemon viminalis	Myrtaceae	Cultivated	Tree
Eucalyptus robusta	Myrtaceae	Cultivated	Tree
Syzygium myrtifolium	Myrtaceae	Cultivated	Tree, Shrub
Melaleuca bracteata	Myrtaceae	Cultivated	Shrub
Syzygium nervosum	Myrtaceae	Cultivated	Tree
Tibouchina semidecandra	Melastomataceae	Cultivated	Shrub
Mangifera persiciforma	Anacardiaceae	Cultivated	Tree, Shrub
Dracontomelon duperreanum	Anacardiaceae	Cultivated	Tree
Mangifera indica	Anacardiaceae	Cultivated	Tree
Dimocarpus longan	Sapindaceae	Cultivated	Tree
Lepisanthes rubiginosa	Sapindaceae	Spontaneously growing	Shrub
Murraya paniculata	Rutaceae	Cultivated	Shrub
Citrus japonica	Rutaceae	Cultivated	Shrub
Citrus maxima	Rutaceae	Cultivated or Spontaneously growing	Shrub
Clausena lansium	Rutaceae	Spontaneously growing	Tree, Shrub
Euodia suaveolens	Rutaceae	Cultivated	Herb
Zanthoxylum beecheyanum	Rutaceae	Cultivated	Shrub
Harrisonia perforata	Rutaceae	Spontaneously growing	Shrub
Brucea javanica	Simaroubaceae	Spontaneously growing	Shrub
Chukrasia tabularis	Meliaceae	Cultivated	Tree
Khaya senegalensis	Meliaceae	Cultivated	Tree
Aglaia odorata	Meliaceae	Cultivated	Shrub
Melia azedarach	Meliaceae	Spontaneously growing	Tree, Shrub
Muntingia calabura	Muntingiaceae	Cultivated	Tree, Shrub
Bombax ceiba	Malvaceae	Cultivated	Tree
Brachychiton acerifolius	Malvaceae	Cultivated	Tree
Ceiba speciosa	Malvaceae	Cultivated	Tree
Hibiscus rosa-sinensis	Malvaceae	Cultivated	Shrub
Pachira glabra	Malvaceae	Cultivated	Tree, Shrub
Abutilon indicum	Malvaceae	Spontaneously growing	Shrub, Herb
Microcos paniculata	Malvaceae	Cultivated or Spontaneously growing	Shrub
Sida acuta	Malvaceae	Spontaneously growing	Shrub, Herb
Sida rhombifolia	Malvaceae	Spontaneously growing	Shrub, Herb
Triumfetta rhomboidea	Malvaceae	Spontaneously growing	Herb
Urena lobata	Malvaceae	Spontaneously growing	Shrub
Waltheria indica	Malvaceae	Spontaneously growing	Herb
Sida cordifolia	Malvaceae	Spontaneously growing	Shrub
Sterculia lanceolata	Malvaceae	Cultivated	Tree
Hibiscus tiliaceus	Malvaceae	Cultivated	Tree
Moringa drouhardii	Moringaceae	Cultivated	Tree
Carica papaya	Caricaceae	Cultivated or Spontaneously growing	Tree, Shrub
Cleome viscosa	Cleomaceae	Spontaneously growing	Herb
Plumbago zeylanica	Plumbaginaceae	Spontaneously growing	Shrub, Herb
Rumex japonicus	Polygonaceae	Spontaneously growing	Herb
Drymaria cordata	Caryophyllaceae	Spontaneously growing	Herb
Achyranthes aspera	Amaranthaceae	Spontaneously growing	Herb
Alternanthera philoxeroides	Amaranthaceae	Spontaneously growing	Herb
Alternanthera bettzickiana	Amaranthaceae	Cultivated	Herb
Alternanthera brasiliana	Amaranthaceae	Cultivated	Herb
Gomphrena celosioides	Amaranthaceae	Spontaneously growing	Herb
Amaranthus spinosus	Amaranthaceae	Spontaneously growing	Herb
Amaranthus viridis	Amaranthaceae	Spontaneously growing	Herb
Celosia argentea	Amaranthaceae	Spontaneously growing	Herb
Trianthema portulacastrum	Aizoaceae	Spontaneously growing	Herb
Bougainvillea spectabilis	Nyctaginaceae	Cultivated	Shrub, Herb
Boerhavia diffusa	Nyctaginaceae	Spontaneously growing	Herb
Mollugo stricta	Molluginaceae	Spontaneously growing	Herb
Talinum fruticosum	Talinaceae	Cultivated	Herb
Portulaca pilosa	Portulacaceae	Cultivated	Herb
Portulaca grandiflora	Portulacaceae	Cultivated	Tree, Herb
Portulaca oleracea	Portulacaceae	Cultivated or Spontaneously growing	Herb
Hylocereus undatus	Cactaceae	Cultivated	Herb
Opuntia dillenii	Cactaceae	Cultivated	Herb
Alangium salviifolium	Cornaceae	Cultivated	Tree
Barringtonia racemosa	Lecythidaceae	Cultivated	Tree
Manilkara zapota	Sapotaceae	Cultivated	Tree
Mimusops elengi	Sapotaceae	Cultivated	Tree
Embelia laeta	Primulaceae	Spontaneously growing	Shrub, Herb
Primula malacoides	Primulaceae	Cultivated	Shrub
Mitracarpus hirtus	Rubiaceae	Spontaneously growing	Herb
Ixora chinensis	Rubiaceae	Cultivated	Tree, Shrub
Gardenia jasminoides	Rubiaceae	Cultivated	Shrub
Hamelia patens	Rubiaceae	Spontaneously growing	Shrub
Ixora coccinea	Rubiaceae	Cultivated	Shrub
Oldenlandia auricularia	Rubiaceae	Spontaneously growing	Herb
Psychotria asiatica	Rubiaceae	Spontaneously growing	Shrub
Richardia scabra	Rubiaceae	Spontaneously growing	Herb
Hedyotis pruinosa	Rubiaceae	Spontaneously growing	Herb
Hedyotis herbacea	Rubiaceae	Spontaneously growing	Herb
Paederia foetida	Rubiaceae	Spontaneously growing	Herb
Spermacoce pusilla	Rubiaceae	Spontaneously growing	Herb
Morinda citrifolia	Rubiaceae	Cultivated	Shrub
Mussaenda erythrophylla	Rubiaceae	Cultivated	Shrub, Herb
Fagraea ceilanica	Gentianaceae	Cultivated	Shrub
Spigelia anthelmia	Loganiaceae	Spontaneously growing	Herb
Alstonia scholaris	Apocynaceae	Cultivated	Tree
Cerbera manghas	Apocynaceae	Cultivated	Tree, Shrub
Allamanda cathartica	Apocynaceae	Cultivated	Shrub
Allamanda schottii	Apocynaceae	Cultivated	Shrub
Catharanthus roseus	Apocynaceae	Cultivated or Spontaneously growing	Shrub, Herb
Nerium oleander	Apocynaceae	Cultivated	Shrub, Herb
Plumeria rubra	Apocynaceae	Cultivated	Tree, Shrub
Tabernaemontana divaricata	Apocynaceae	Cultivated	Shrub
Thevetia peruviana	Apocynaceae	Cultivated	Shrub
Carmona microphylla	Boraginaceae	Cultivated	Shrub
Heliotropium indicum	Boraginaceae	Spontaneously growing	Herb
Ipomoea nil	Convolvulaceae	Spontaneously growing	Herb
Ipomoea obscura	Convolvulaceae	Spontaneously growing	Herb
Ipomoea aquatica	Convolvulaceae	Cultivated or Spontaneously growing	Herb
Cuscuta chinensis	Convolvulaceae	Spontaneously growing	Herb
Evolvulus alsinoides	Convolvulaceae	Spontaneously growing	Herb
Ipomoea batatas	Convolvulaceae	Cultivated or Spontaneously growing	Herb
Ipomoea cairica	Convolvulaceae	Spontaneously growing	Herb
Ipomoea pes-caprae	Convolvulaceae	Spontaneously growing	Herb
Physalis angulata	Solanaceae	Spontaneously growing	Herb
Brunfelsia brasiliensis	Solanaceae	Cultivated	Shrub
Cestrum nocturnum	Solanaceae	Cultivated	Herb
Solanum tuberosum	Solanaceae	Cultivated	Herb
Datura stramonium	Solanaceae	Cultivated	Herb
Jasminum nudiflorum	Oleaceae	Cultivated	Herb
Jasminum sambac	Oleaceae	Cultivated	Shrub
Ligustrum sinense	Oleaceae	Cultivated or Spontaneously growing	Shrub
Russelia equisetiformis	Plantaginaceae	Cultivated	Herb
Scoparia dulcis	Plantaginaceae	Spontaneously growing	Herb
Torenia fournieri	Linderniaceae	Cultivated	Herb
Lindernia crustacea	Linderniaceae	Spontaneously growing	Herb
Lindernia ruellioides	Linderniaceae	Spontaneously growing	Herb
Volkameria inermis	Lamiaceae	Cultivated	Shrub
Ocimum basilicum	Lamiaceae	Spontaneously growing	Herb
Thunbergia erecta	Acanthaceae	Cultivated or Spontaneously growing	Shrub
Sanchezia speciosa	Acanthaceae	Cultivated	Shrub, Herb
Justicia gendarussa	Acanthaceae	Cultivated	Herb
Justicia procumbens	Acanthaceae	Spontaneously growing	Herb
Ruellia elegans	Acanthaceae	Cultivated	Herb
Ruellia simplex	Acanthaceae	Cultivated	Shrub, Herb
Tabebuia aurea	Bignoniaceae	Cultivated	Tree
Handroanthus impetiginosus	Bignoniaceae	Cultivated	Tree
Pyrostegia venusta	Bignoniaceae	Cultivated	Shrub
Spathodea campanulata	Bignoniaceae	Cultivated	Tree
Kigelia africana	Bignoniaceae	Cultivated	Tree
Radermachera sinica	Bignoniaceae	Cultivated	Tree
Crescentia cujete	Bignoniaceae	Cultivated	Tree
Tecoma capensis	Bignoniaceae	Cultivated	Shrub
Lantana montevidensis	Verbenaceae	Cultivated	Shrub, Herb
Phyla nodiflora	Verbenaceae	Spontaneously growing	Herb
Stachytarpheta jamaicensis	Verbenaceae	Spontaneously growing	Herb
Duranta erecta	Verbenaceae	Cultivated	Tree, Shrub
Lantana camara	Verbenaceae	Cultivated or Spontaneously growing	Shrub
Scaevola taccada	Goodeniaceae	Cultivated	Shrub, Herb
Launaea sarmentosa	Asteraceae	Spontaneously growing	Herb
Praxelis clematidea	Asteraceae	Spontaneously growing	Herb
Tridax procumbens	Asteraceae	Spontaneously growing	Herb
Bidens pilosa	Asteraceae	Spontaneously growing	Herb
Chromolaena odorata	Asteraceae	Spontaneously growing	Shrub, Herb
Cyanthillium cinereum	Asteraceae	Spontaneously growing	Herb
Erigeron canadensis	Asteraceae	Spontaneously growing	Herb
Mikania micrantha	Asteraceae	Spontaneously growing	Herb
Synedrella nodiflora	Asteraceae	Spontaneously growing	Herb
Artemisia indica	Asteraceae	Spontaneously growing	Herb
Eclipta prostrata	Asteraceae	Spontaneously growing	Herb
Elephantopus scaber	Asteraceae	Spontaneously growing	Herb
Emilia sonchifolia	Asteraceae	Spontaneously growing	Herb
Sphagneticola trilobata	Asteraceae	Cultivated or Spontaneously growing	Herb
Sphagneticola calendulacea	Asteraceae	Spontaneously growing	Herb
Heptapleurum heptaphyllum	Araliaceae	Cultivated	Tree, Shrub
Polyscias guilfoylei	Araliaceae	Cultivated	Shrub
Schefflera actinophylla	Araliaceae	Cultivated	Tree, Shrub
Heteropanax fragrans	Araliaceae	Cultivated	Tree
Hydrocotyle sibthorpioides	Araliaceae	Spontaneously growing	Herb
Hydrocotyle vulgaris	Araliaceae	Cultivated	Herb
Schefflera arboricola	Araliaceae	Cultivated	Tree, Shrub, Herb
Schefflera heptaphylla	Araliaceae	Cultivated or Spontaneously growing	Tree

## Sheet: Yazhou
Plant list in the build-up area of Yazhou recorded in investigation
Latin name	Family name	Cultivated or Spontaneously growing	Life form
Lygodium japonicum	Lygodiaceae	Spontaneously growing	Herb
Lygodium microphyllum	Lygodiaceae	Spontaneously growing	Herb
Eremochloa ciliaris	Pteridaceae	Spontaneously growing	Herb
Paragymnopteris delavayi	Pteridaceae	Spontaneously growing	Herb
Adiantum pedatum	Pteridaceae	Spontaneously growing	Herb
Pteris arisanensis	Pteridaceae	Cultivated	Herb
Pteris ensiformis	Pteridaceae	Spontaneously growing	Herb
Pteris semipinnata	Pteridaceae	Spontaneously growing	Herb
Nephrolepis auriculata	Nephrolepidaceae	Cultivated	Herb
Nephrolepis exaltata	Nephrolepidaceae	Cultivated	Herb
Pyrrosia adnascens	Polypodiaceae	Spontaneously growing	Herb
Lemmaphyllum microphyllum	Polypodiaceae	Spontaneously growing	Herb
Cycas revoluta	Cycadaceae	Cultivated	Shrub
Cycas panzhihuaensis	Cycadaceae	Cultivated	Shrub
Cycas taiwaniana	Cycadaceae	Cultivated	Shrub
Araucaria cunninghamii	Araucariaceae	Cultivated	Tree
Araucaria heterophylla	Araucariaceae	Cultivated	Tree
Podocarpus chinensis	Podocarpaceae	Cultivated	Shrub
Podocarpus macrophyllus	Podocarpaceae	Cultivated	Shrub
Piper kadsura	Piperaceae	Cultivated	Herb
Piper sarmentosum	Piperaceae	Cultivated	Herb
Michelia alba	Magnoliaceae	Cultivated	Tree
Magnolia henryi	Magnoliaceae	Cultivated	Tree
Michelia maudiae	Magnoliaceae	Cultivated	Tree
Magnolia championii	Magnoliaceae	Cultivated	Tree
Parakmeria lotungensis	Magnoliaceae	Cultivated	Tree
Yulania liliiflora	Magnoliaceae	Cultivated	Tree
Michelia figo	Magnoliaceae	Cultivated	Tree
Annona muricata	Annonaceae	Cultivated	Tree
Annona squamosa	Annonaceae	Cultivated	Shrub
Desmos chinensis	Annonaceae	Spontaneously growing	Shrub
Persea americana	Lauraceae	Spontaneously growing	Tree
Cinnamomum camphora	Lauraceae	Cultivated	Tree
Phoebe zhennan	Lauraceae	Spontaneously growing	Tree
Cinnamomum japonicum	Lauraceae	Spontaneously growing	Tree
Litsea glutinosa	Lauraceae	Spontaneously growing	Tree, Shrub
Cinnamomum burmanni	Lauraceae	Cultivated	Tree
Cinnamomum kotoense	Lauraceae	Cultivated	Shrub
Machilus nanmu	Lauraceae	Spontaneously growing	Tree
Cinnamomum bodinieri	Lauraceae	Spontaneously growing	Tree
Colocasia gigantea	Araceae	Cultivated	Herb
Colocasia antiquorum	Araceae	Cultivated	Herb
Colocasia esculenta	Araceae	Cultivated	Herb
Thaumatophyllum bipinnatifidum	Araceae	Cultivated	Herb
Monstera deliciosa	Araceae	Cultivated	Herb
Philodendron erubescens	Araceae	Cultivated	Herb
Zamioculcas zamiifolia	Araceae	Cultivated	Herb
Pandanus tectorius	Pandanaceae	Cultivated	Shrub
Pandanus utilis	Pandanaceae	Cultivated	Tree, Shrub
Phormium tenax	Liliaceae	Cultivated	Shrub
Dianella caerulea	Liliaceae	Cultivated	Herb
Liparis viridiflora	Orchidaceae	Cultivated	Tree
Platanthera minor	Orchidaceae	Cultivated	Tree
Crinum asiaticum	Amaryllidaceae	Cultivated	Herb
Curculigo orchioides	Amaryllidaceae	Cultivated	Herb
Curculigo capitulata	Amaryllidaceae	Cultivated	Herb
Allium chinense	Amaryllidaceae	Cultivated	Herb
Hymenocallis littoralis	Amaryllidaceae	Cultivated	Tree, Shrub, Herb
Hippeastrum reticulatum	Amaryllidaceae	Cultivated	Herb
Hippeastrum striatum	Amaryllidaceae	Cultivated	Herb
Crinum moorei	Amaryllidaceae	Cultivated	Herb
Dracaena sanderianaSander	Asparagaceae	Cultivated	Shrub, Herb
Rohdea japonica	Asparagaceae	Cultivated	Herb
Reineckea carnea	Asparagaceae	Cultivated	Shrub, Herb
Agave americana	Asparagaceae	Cultivated	Herb
Chlorophytum comosum	Asparagaceae	Cultivated	Herb
Wodyetia bifurcata	Arecaceae	Cultivated	Tree, Shrub
Chrysalidocarpus lutescens	Arecaceae	Cultivated	Shrub
Caryota maxima	Arecaceae	Cultivated	Tree
Trachycarpus fortunei	Arecaceae	Cultivated	Tree
Syagrus romanzoffiana	Arecaceae	Cultivated	Shrub
Cocos nucifera	Arecaceae	Cultivated	Tree, Shrub
Trachycarpus nana	Arecaceae	Cultivated	Shrub
Livistona chinensis	Arecaceae	Cultivated	Tree, Shrub
Tradescantia spathacea	Commelinaceae	Cultivated	Herb
Murdannia loriformis	Commelinaceae	Spontaneously growing	Herb
Commelina diffusa	Commelinaceae	Cultivated	Herb
Commelina communis	Commelinaceae	Spontaneously growing	Herb
Commelina paludosa	Commelinaceae	Cultivated	Herb
Murdannia triquetra	Commelinaceae	Cultivated	Herb
Strelitzia nicolaiBegel	Strelitziaceae	Cultivated	Shrub, Herb
Ravenala madagascariensis	Strelitziaceae	Cultivated	Shrub, Herb
Heliconia metallica	Heliconiaceae	Cultivated	Herb
Heliconia psittacorum	Heliconiaceae	Cultivated	Herb
Musa basjoo	Musaceae	Cultivated	Herb
Musa nana	Musaceae	Cultivated	Herb
Canna glauca	Cannaceae	Cultivated	Herb
Canna indica	Cannaceae	Cultivated	Herb
Canna orchioides	Cannaceae	Cultivated	Herb
Canna warszewiczii	Cannaceae	Cultivated	Herb
Phrynium rheedei	Marantaceae	Cultivated	Herb
Maranta arundinacea	Marantaceae	Cultivated	Herb
Curcuma phaeocaulis	Zingiberaceae	Cultivated	Herb
Alpinia zerumbet	Zingiberaceae	Cultivated	Herb
Alpinia hainanensis	Zingiberaceae	Cultivated	Herb
Cyperus rotundus	Cyperaceae	Spontaneously growing	Herb
Cyperus microiria	Cyperaceae	Spontaneously growing	Herb
Eleocharis yokoscensis	Cyperaceae	Spontaneously growing	Herb
Cyperus iria	Cyperaceae	Spontaneously growing	Herb
Cyperus difformis	Cyperaceae	Spontaneously growing	Herb
Carex siderosticta	Cyperaceae	Spontaneously growing	Herb
Kyllinga brevifolia	Cyperaceae	Spontaneously growing	Herb
Bambusa tuldoides	Poaceae	Cultivated	Shrub
Cenchrus alopecuroides	Poaceae	Spontaneously growing	Herb
Echinochloa colona	Poaceae	Spontaneously growing	Herb
Cynodon dactylon	Poaceae	Cultivated or Spontaneously growing	Herb
Panicum repens	Poaceae	Spontaneously growing	Herb
Zoysia sinica	Poaceae	Spontaneously growing	Herb
Axonopus compressus	Poaceae	Cultivated or Spontaneously growing	Herb
Paspalum thunbergii	Poaceae	Spontaneously growing	Herb
Miscanthus sinensis	Poaceae	Spontaneously growing	Herb
Fortunearia sinensis	Hamamelidaceae	Cultivated	Shrub
Sinowilsonia henryi	Hamamelidaceae	Cultivated	Shrub
Loropetalum chinense	Hamamelidaceae	Cultivated	Shrub
Parthenocissus tricuspidata	Vitaceae	Cultivated	Shrub
Parthenocissus semicordata	Vitaceae	Cultivated	Shrub
Causonis japonica	Vitaceae	Cultivated	Shrub
Cissus hexangularis	Vitaceae	Cultivated	Shrub
Acacia confusa	Fabaceae	Cultivated	Tree
Mimosa invisa	Fabaceae	Spontaneously growing	Shrub, Herb
Robinia pseudoacacia	Fabaceae	Cultivated	Tree, Shrub
Delonix regia	Fabaceae	Cultivated	Tree
Canavalia rosea	Fabaceae	Spontaneously growing	Herb
Senna surattensis	Fabaceae	Cultivated	Tree, Shrub
Grona heterocarpos	Fabaceae	Spontaneously growing	Herb
Dalbergia odorifera	Fabaceae	Cultivated	Tree
Alysicarpus vaginalis	Fabaceae	Spontaneously growing	Herb
Styphnolobium japonicum	Fabaceae	Cultivated	Tree
Acacia mangium	Fabaceae	Cultivated	Tree
Arachis duranensis	Fabaceae	Cultivated or Spontaneously growing	Herb
Medicago sativa	Fabaceae	Spontaneously growing	Herb
Desmodium triflorum	Fabaceae	Spontaneously growing	Herb
Sesbania cannabina	Fabaceae	Spontaneously growing	Herb
Senna siamea	Fabaceae	Cultivated	Tree
Calliandra haematocephala	Fabaceae	Cultivated	Shrub
Macroptilium atropurpureum	Fabaceae	Spontaneously growing	Herb
Leptodesmia microphylla	Fabaceae	Cultivated	Tree, Shrub, Herb
Chamaecrista nictitans	Fabaceae	Cultivated	Tree, Shrub, Herb
Mimosa pudica	Fabaceae	Spontaneously growing	Herb
Crotalaria albida	Fabaceae	Cultivated	Tree, Shrub, Herb
Crotalaria trichotoma	Fabaceae	Cultivated	Tree, Shrub, Herb
Rhamnus leptophylla	Rhamnaceae	Spontaneously growing	Shrub
Artocarpus heterophyllus	Moraceae	Cultivated	Tree
Ficus benjamina	Moraceae	Cultivated	Tree, Shrub
Ficus hispida	Moraceae	Spontaneously growing	Tree, Shrub
Ficus altissima	Moraceae	Cultivated	Tree
Ficus virens	Moraceae	Cultivated	Tree
Artocarpus altilis	Moraceae	Cultivated	Tree
Streblus asper	Moraceae	Cultivated or Spontaneously growing	Tree, Shrub
Ficus microcarpa	Moraceae	Cultivated or Spontaneously growing	Tree, Shrub
Ficus deltoidea	Moraceae	Cultivated	Shrub
Ficus religiosa	Moraceae	Cultivated	Tree
Broussonetia papyrifera	Moraceae	Cultivated	Tree
Morus australis	Moraceae	Cultivated	Tree
Quercus acutissima	Fagaceae	Cultivated	Tree
Castanopsis chinensis	Fagaceae	Cultivated	Tree
Castanopsis fargesii	Fagaceae	Cultivated	Tree
Coccinia grandis	Cucurbitaceae	Cultivated or Spontaneously growing	Herb
Actinostemma tenerum	Cucurbitaceae	Cultivated or Spontaneously growing	Herb
Cucurbita moschata	Cucurbitaceae	Cultivated or Spontaneously growing	Herb
Oxalis articulata	Oxalidaceae	Cultivated	Tree
Averrhoa carambola	Oxalidaceae	Cultivated	Tree
Oxalis debilis	Oxalidaceae	Cultivated	Tree
Oxalis corniculata	Oxalidaceae	Spontaneously growing	Herb
Oxalis triangularis	Oxalidaceae	Cultivated	Tree
Elaeocarpus hainanensis	Elaeocarpaceae	Cultivated	Tree
Elaeocarpus decipiens	Elaeocarpaceae	Cultivated	Tree
Carallia brachiata	Rhizophoraceae	Cultivated	Shrub
Bruguiera gymnorhiza	Rhizophoraceae	Cultivated	Shrub
Acalypha wilkesiana	Euphorbiaceae	Cultivated	Shrub
Euphorbia cyathophora	Euphorbiaceae	Spontaneously growing	Herb
Acalypha australis	Euphorbiaceae	Spontaneously growing	Herb
Mallotus peltatus	Euphorbiaceae	Spontaneously growing	Shrub
Manihot esculenta	Euphorbiaceae	Cultivated or Spontaneously growing	Shrub
Jatropha integerrima	Euphorbiaceae	Cultivated	Tree, Shrub
Acalypha hispida	Euphorbiaceae	Cultivated	Shrub
Phyllanthus cochinchinensis	Phyllanthaceae	Spontaneously growing	Shrub
Bridelia tomentosa	Phyllanthaceae	Spontaneously growing	Tree
Phyllanthus urinaria	Phyllanthaceae	Spontaneously growing	Herb
Breynia disticha	Phyllanthaceae	Spontaneously growing	Shrub
Phyllanthus reticulatus	Phyllanthaceae	Spontaneously growing	Shrub
Flueggea virosa	Phyllanthaceae	Spontaneously growing	Shrub
Phyllanthus ussuriensis	Phyllanthaceae	Spontaneously growing	Shrub
Passiflora foetida	Passifloraceae	Spontaneously growing	Herb
Passiflora edulis	Passifloraceae	Cultivated	Herb
Salix matsudana	Salicaceae	Cultivated	Shrub
Populus nigra	Salicaceae	Cultivated	Shrub
Populus przewalskii	Salicaceae	Cultivated	Shrub
Mesua ferrea	Clusiaceae	Cultivated	Shrub
Garcinia subelliptica	Clusiaceae	Cultivated	Shrub
Terminalia neotaliala	Combretaceae	Cultivated	Tree
Terminalia catappa	Combretaceae	Cultivated	Tree
Quisqualis indica	Combretaceae	Cultivated	Tree, Shrub, Herb
Lagerstroemia indica	Lythraceae	Cultivated	Tree, Shrub
Cuphea hookeriana	Lythraceae	Cultivated	Shrub, Herb
Lawsonia inermis	Lythraceae	Cultivated	Shrub, Herb
Lagerstroemia speciosa	Lythraceae	Cultivated	Tree
Cuphea balsamona	Lythraceae	Cultivated	Shrub, Herb
Callistemon hybridus	Myrtaceae	Cultivated	Shrub
Plinia cauliflora	Myrtaceae	Cultivated	Shrub
Syzygium hainanense	Myrtaceae	Cultivated	Shrub
Myrtus communis	Myrtaceae	Cultivated	Shrub
Syzygium jambos	Myrtaceae	Cultivated or Spontaneously growing	Shrub
Psidium guajava	Myrtaceae	Cultivated	Shrub
Memecylon ligustrifolium	Melastomataceae	Cultivated	Shrub
Pleroma semidecandrum	Melastomataceae	Cultivated	Shrub
Dracontomelon duperreanum	Anacardiaceae	Cultivated	Tree
Rhus Typhina	Anacardiaceae	Cultivated	Tree, Shrub
Mangifera indica	Anacardiaceae	Cultivated	Tree
Cotinus coggygria	Anacardiaceae	Cultivated	Tree, Shrub
Koelreuteria paniculata	Sapindaceae	Cultivated	Tree
Nephelium lappaceum	Sapindaceae	Cultivated	Tree
Cardiospermum halicacabum	Sapindaceae	Cultivated	Tree
Litchi chinensis	Sapindaceae	Cultivated	Tree
Dimocarpus longan	Sapindaceae	Cultivated	Tree
Citrus maxima	Rutaceae	Cultivated or Spontaneously growing	Shrub
Murraya paniculata	Rutaceae	Cultivated	Shrub
Clausena lansium	Rutaceae	Spontaneously growing	Tree, Shrub
Phellodendron sinii	Rutaceae	Cultivated	Shrub
Citrus × limon	Rutaceae	Cultivated	Shrub
Citrus × aurantium	Rutaceae	Cultivated	Shrub
Citrus japonica	Rutaceae	Cultivated	Shrub
Melia azedarach	Meliaceae	Spontaneously growing	Tree, Shrub
Aglaia odorata	Meliaceae	Cultivated	Shrub
Swietenia mahagoni	Meliaceae	Cultivated	Tree
Khayaseegalesis	Meliaceae	Cultivated	Tree
Toona sinensis	Meliaceae	Cultivated	Tree
Chukrasia tabularis	Meliaceae	Cultivated	Tree
Malvastrum coromandelianum	Malvaceae	Cultivated	Tree
Malvaviscus penduliflorus	Malvaceae	Cultivated	Tree
Sida acuta	Malvaceae	Spontaneously growing	Shrub, Herb
Urena lobata	Malvaceae	Spontaneously growing	Shrub
Sida yunnanensis	Malvaceae	Cultivated	Tree
Hibiscus tiliaceus	Malvaceae	Cultivated	Tree
Hibiscus rosa-sinensis	Malvaceae	Cultivated	Shrub
Hibiscus schizopetalus	Malvaceae	Cultivated	Tree
Sida rhombifolia	Malvaceae	Spontaneously growing	Shrub, Herb
Triumfetta rhomboidea	Malvaceae	Spontaneously growing	Herb
Heritiera parvifolia	Malvaceae	Cultivated	Tree
Brachychiton rupestris	Malvaceae	Cultivated	Tree
Carica papaya	Caricaceae	Cultivated or Spontaneously growing	Tree, Shrub
Persicaria hastatosagittata	Polygonaceae	Spontaneously growing	Herb
Pleuropterus multiflorus	Polygonaceae	Spontaneously growing	Herb
Silene conoidea	Caryophyllaceae	Spontaneously growing	Herb
Drymaria cordata	Caryophyllaceae	Spontaneously growing	Herb
Alternanthera bettzickiana	Amaranthaceae	Cultivated	Herb
Alternanthera sessilis	Amaranthaceae	Spontaneously growing	Herb
Alternanthera philoxeroides	Amaranthaceae	Spontaneously growing	Herb
Dysphania schraderiana	Amaranthaceae	Spontaneously growing	Herb
Amaranthus spinosus	Amaranthaceae	Spontaneously growing	Herb
Gomphrena celosioides	Amaranthaceae	Spontaneously growing	Herb
Bougainvillea spectabilis	Nyctaginaceae	Cultivated	Shrub, Herb
Bougainvillea	Nyctaginaceae	Cultivated	Shrub, Herb
Bougainvillea glabra	Nyctaginaceae	Cultivated	Shrub, Herb
Boerhavia diffusa	Nyctaginaceae	Spontaneously growing	Herb
Portulaca oleracea	Portulacaceae	Cultivated or Spontaneously growing	Herb
Portulaca pilosa	Portulacaceae	Cultivated	Herb
Barringtonia macrostachya	Lecythidaceae	Cultivated	Tree
Mimusops elengi	Sapotaceae	Cultivated	Tree
Synsepalum dulcificum	Sapotaceae	Cultivated	Tree
Pouteria campechiana	Sapotaceae	Cultivated	Tree
Ardisia pusilla	Primulaceae	Spontaneously growing	Shrub, Herb
Stimpsonia chamaedryoides	Primulaceae	Spontaneously growing	Shrub, Herb
Mussaenda pubescens	Rubiaceae	Spontaneously growing	Herb
Spermacoce pusilla	Rubiaceae	Spontaneously growing	Herb
Rubia cordifolia	Rubiaceae	Spontaneously growing	Herb
Ixora chinensis	Rubiaceae	Cultivated	Tree, Shrub
Hedyotis corymbosa	Rubiaceae	Spontaneously growing	Herb
Hedyotis uncinella	Rubiaceae	Spontaneously growing	Herb
Psychotria asiatica	Rubiaceae	Spontaneously growing	Shrub
Ixora coccinea	Rubiaceae	Cultivated	Shrub
Hedyotis auricularia	Rubiaceae	Spontaneously growing	Herb
Fagraea ceilanica	Gentianaceae	Cultivated	Shrub
Tabernaemontana divaricata	Apocynaceae	Cultivated	Shrub
Catharanthus roseus	Apocynaceae	Cultivated or Spontaneously growing	Shrub, Herb
Nerium oleander	Apocynaceae	Cultivated	Shrub, Herb
Alstonia scholaris	Apocynaceae	Cultivated	Tree
Plumeria rubra	Apocynaceae	Cultivated	Tree, Shrub
Cryptostegia grandiflora	Apocynaceae	Cultivated	Tree
Trigonotis peduncularis	Boraginaceae	Cultivated	Shrub
Heliotropium indicum	Boraginaceae	Spontaneously growing	Herb
Thyrocarpus sampsonii	Boraginaceae	Cultivated	Shrub
Lappula myosotis	Boraginaceae	Cultivated	Shrub
Carmona microphylla	Boraginaceae	Cultivated	Shrub
Cuscuta japonica	Convolvulaceae	Spontaneously growing	Herb
Ipomoea biflora	Convolvulaceae	Spontaneously growing	Herb
Dichondra micrantha	Convolvulaceae	Spontaneously growing	Herb
Ipomoea obscura	Convolvulaceae	Spontaneously growing	Herb
Ipomoea batatas	Convolvulaceae	Cultivated or Spontaneously growing	Herb
Ipomoea aquatica	Convolvulaceae	Cultivated or Spontaneously growing	Herb
Ipomoea carnea	Convolvulaceae	Spontaneously growing	Herb
Solanum nigrum	Solanaceae	Spontaneously growing	Herb
Cestrum nocturnum	Solanaceae	Cultivated	Herb
Brunfelsia latifolia	Solanaceae	Spontaneously growing	Herb
Solanum americanum	Solanaceae	Spontaneously growing	Herb
Capsicum annuum	Solanaceae	Spontaneously growing	Herb
Solanum pseudocapsicum	Solanaceae	Spontaneously growing	Herb
Solanum tuberosum	Solanaceae	Cultivated	Herb
Jasminum sambac	Oleaceae	Cultivated	Shrub
Osmanthus	Oleaceae	Cultivated	Herb
Forsythia suspensa	Oleaceae	Cultivated	Herb
Ligustrum lucidum	Oleaceae	Cultivated	Herb
Ligustrum sinense	Oleaceae	Cultivated or Spontaneously growing	Shrub
Olea europaea	Oleaceae	Cultivated	Herb
Salvia miltiorrhiza	Lamiaceae	Cultivated	Shrub
Mosla dianthera	Lamiaceae	Cultivated	Shrub
Salvia bowleyana	Lamiaceae	Cultivated	Shrub
Ocimum basilicum	Lamiaceae	Spontaneously growing	Herb
Mentha canadensis	Lamiaceae	Cultivated	Shrub
Coleus scutellarioides	Lamiaceae	Cultivated	Shrub
Ruellia simplex	Acanthaceae	Cultivated	Shrub, Herb
Asystasia gangetica	Acanthaceae	Cultivated or Spontaneously growing	Shrub
Clinacanthus nutans	Acanthaceae	Cultivated or Spontaneously growing	Shrub
Ruellia brittoniana	Acanthaceae	Cultivated or Spontaneously growing	Shrub
Sanchezia nobilis	Acanthaceae	Cultivated or Spontaneously growing	Shrub
Barleria cristata	Acanthaceae	Cultivated or Spontaneously growing	Shrub
Lepidagathis incurva	Acanthaceae	Cultivated or Spontaneously growing	Shrub
Justicia gendarussa	Acanthaceae	Cultivated	Herb
Sanchezia oblonga	Acanthaceae	Cultivated or Spontaneously growing	Shrub
Justicia quadrifaria	Acanthaceae	Cultivated or Spontaneously growing	Shrub
Justicia procumbens	Acanthaceae	Spontaneously growing	Herb
Fittonia verschaffeltii	Acanthaceae	Cultivated or Spontaneously growing	Shrub
Ruellia elegans	Acanthaceae	Cultivated	Herb
Strobilanthes henryi	Acanthaceae	Cultivated or Spontaneously growing	Shrub
Dicliptera chinensis	Acanthaceae	Cultivated or Spontaneously growing	Shrub
Kigelia africana	Bignoniaceae	Cultivated	Tree
Handroanthus impetiginosus	Bignoniaceae	Cultivated	Tree
Jacaranda mimosifolia	Bignoniaceae	Cultivated	Tree
Radermachera sinica	Bignoniaceae	Cultivated	Tree
Catalpa fargesii	Bignoniaceae	Cultivated	Tree
Duranta repens	Verbenaceae	Cultivated	Shrub, Herb
Duranta erecta	Verbenaceae	Cultivated	Tree, Shrub
Lantana montevidensis	Verbenaceae	Cultivated	Shrub, Herb
Vitex quinata	Verbenaceae	Cultivated	Shrub, Herb
Lantana camara	Verbenaceae	Cultivated or Spontaneously growing	Shrub
Verbena officinalis	Verbenaceae	Cultivated	Shrub, Herb
Petrea volubilis	Verbenaceae	Cultivated	Shrub, Herb
Stachytarpheta jamaicensis	Verbenaceae	Spontaneously growing	Herb
Scaevola taccada	Goodeniaceae	Cultivated	Shrub, Herb
Launaea sarmentosa	Asteraceae	Spontaneously growing	Herb
Praxelis clematidea	Asteraceae	Spontaneously growing	Herb
Elephantopus scaber	Asteraceae	Spontaneously growing	Herb
Emilia sonchifolia	Asteraceae	Spontaneously growing	Herb
Sphagneticola trilobata	Asteraceae	Cultivated or Spontaneously growing	Herb
Sphagneticola calendulacea	Asteraceae	Spontaneously growing	Herb
Blumea axillaris	Asteraceae	Spontaneously growing	Herb
Cirsium belingschanicum	Asteraceae	Spontaneously growing	Herb
Artemisia lancea	Asteraceae	Spontaneously growing	Herb
Schefflera arboricola	Araliaceae	Cultivated	Tree, Shrub, Herb
Dizygotheca elegantissima	Araliaceae	Cultivated	Tree, Shrub
Heteropanax fragrans	Araliaceae	Cultivated	Tree
Schefflera octophylla	Araliaceae	Cultivated	Tree, Shrub
Heptapleurum actinophyllum	Araliaceae	Cultivated	Tree, Shrub
Polyscias scutellaria	Araliaceae	Cultivated	Tree, Shrub
Hydrocotyle sibthorpioides	Apiaceae	Spontaneously growing	Herb
Hydrocotyle vulgaris	Apiaceae	Cultivated	Herb
